# Supplementary material for: How effective is teamwork really? The relationship between teamwork and performance in healthcare teams: a systematic review and meta-analysis
Source: PubMed Central journal article supplement — BMJ Open. 2019 Sep 12;9(9):e028280. doi: 10.1136/bmjopen-2018-028280 (PMC6747874; doi:10.1136/bmjopen-2018-028280), 2019-09-12
Supplement: bmjopen-2018-028280.draft_revisions.pdf [file bmjopen-2018-028280.draft_revisions.pdf]

# BMJ Open

BMJ Open is committed to open peer review. As part of this commitment we make the peer review history of every article we publish publicly available.

When an article is published we post the peer reviewers' comments and the authors' responses online. We also post the versions of the paper that were used during peer review. These are the versions that the peer review comments apply to.

The versions of the paper that follow are the versions that were submitted during the peer review process. They are not the versions of record or the final published versions. They should not be cited or distributed as the published version of this manuscript.

BMJ Open is an open access journal and the full, final, typeset and author-corrected version of record of the manuscript is available on our site with no access controls, subscription charges or pay-per-view fees (<http://bmjopen.bmj.com>).

If you have any questions on BMJ Open's open peer review process please email [info.bmjopen@bmj.com](mailto:info.bmjopen@bmj.com)

# BMJ Open

## How effective is teamwork really? The relationship between teamwork and performance in healthcare teams: A systematic review and meta-analysis

|                               |                                                                                                                                                                                                                                                          |
|-------------------------------|----------------------------------------------------------------------------------------------------------------------------------------------------------------------------------------------------------------------------------------------------------|
| Journal:                      | <i>BMJ Open</i>                                                                                                                                                                                                                                          |
| Manuscript ID                 | bmjopen-2018-028280                                                                                                                                                                                                                                      |
| Article Type:                 | Research                                                                                                                                                                                                                                                 |
| Date Submitted by the Author: | 29-Nov-2018                                                                                                                                                                                                                                              |
| Complete List of Authors:     | Schmutz, Jan B.; Northwestern University, Department of Communication Studies<br>Meier, Laurenz ; University of Neuchâtel , Occupational Psychology and Organizations<br>Manser, Tanja; University of Applied Sciences and Arts Northwestern Switzerland |
| Keywords:                     | teamwork, non-technical skills, communication, meta-analysis, teams                                                                                                                                                                                      |
|                               |                                                                                                                                                                                                                                                          |

SCHOLARONE™  
Manuscripts

1  
2  
3 **How effective is teamwork really? The relationship between teamwork and**  
4 **performance in healthcare teams: A systematic review and meta-analysis**  
5  
6  
7

8 **Jan B. Schmutz, PhD**  
9

10 Researcher at the Department of Communication Studies, Northwestern University, Evanston,  
11 USA  
12

13 Postdoctoral Researcher and Lecturer at the Department of Management, Technology, and  
14 Economics, ETH Zurich, Zurich, Switzerland  
15

16 jan.schmutz@northwestern.edu  
17  
18

19 **Laurenz L. Meier, PhD**  
20

21 Professor at the Institute of Work and Organizational Psychology, University of Neuchâtel,  
22 Neuchâtel, Switzerland  
23

24 laurenz.meier@unine.ch  
25  
26

27 **Tanja Manser, PhD**  
28

29 Director of the FHNW School of Applied Psychology, University of Applied Sciences and Arts  
30 Northwestern Switzerland, Olten, Switzerland  
31

32 tanja.manser@fhnw.ch  
33  
34

35 Word count: 3807  
36  
37

38 Keywords: teamwork, non-technical skills, communication, teams, meta-analysis  
39  
40  
41  
42

43 **Correspondence to**  
44

45 Jan B. Schmutz  
46 ATLAS Lab  
47 Department of Communication Studies  
48 Northwestern University  
49 Frances Searle Building 1.220  
50 2240 Campus Drive  
51 Evanston, IL 60208  
52 United States  
53 Phone 847-491-7023  
54 jan.schmutz@northwestern.edu  
55  
56  
57  
58  
59  
60

## ABSTRACT

**Objectives** To investigate the relationship between teamwork and clinical performance and potential moderating variables of this relationship.

**Design** Systematic review and meta-analysis.

**Methods** Data sources were searched up to June 2018 and included PubMed, manual backward search of relevant reviews, manual backward and forward search of studies included in the meta-analysis and contacting of selected authors via e-mail. Studies were included if they reported a relationship between a teamwork process and a performance measure. Moderator variables (i.e. professional composition, team familiarity, average teams size, task type, patient realism and type of performance measure) were coded and random-effect models were estimated. Two investigator independently extracted information on study characteristics in accordance with PRISMA guidelines.

**Results** The review identified 2002 articles of which 31 were included in the meta-analysis comprising 1390 teams. The sample-sized weighted mean correlation was  $r = .28$ , indicating that teamwork is positively related to performance. The test of moderators was not significant, suggesting that the examined factors did not influence the average effect of teamwork on performance.

**Conclusion** Teamwork has a medium-sized effect on performance. The analysis of moderators illustrated that teamwork relates to performance regardless of characteristics of the team or task. Therefore, healthcare organizations should recognize the value of teamwork and emphasize approaches that maintain and improve teamwork for the benefit of their patients.

## ARTICLE SUMMARY

### Strengths and limitations of this study

- This systematic review evaluates available studies investigating the effectiveness of teamwork processes.
- 31 studies have been included resulting in a substantial sample size of 1390 teams.
- The sample size of the primary studies included is usually low.
- For some subgroup analysis, the number of studies included was small.

## INTRODUCTION

Teams are ubiquitous in healthcare and must work across professional, disciplinary and sectorial boundaries. Experts agree that effective teamwork anchors safe and effective care at various levels of the healthcare systems[1-4] leading to a relatively recent shift towards team research and training.[5-7] Our field now widely accepts that a team of individual experts does not necessarily make an expert team.[8,9]

However, the literature investigating healthcare teams reports mixed and sometimes even contradicting results about the relationship between teamwork and clinical performance.[9] Some studies find a large effect of teamwork on performance (e.g. Carlson et al.[10]) while others report small or no relationships.[11,12] This inconsistency arises due to several reasons. First, the conceptual and empirical literature examining teamwork is fragmented and research examining teamwork effectiveness is spread across disciplines including medicine, psychology and organization science. Therefore, researchers and practitioners often lack a common conceptual foundation for investigating teams and teamwork in healthcare. Second, research studies on teamwork in healthcare usually exhibit small sample sizes because of the challenges of recruiting actual professional teams and carefully balancing research with patient care priorities. Small sample sizes, however, increase the likelihood of reporting results that fail to represent true effect. Third, studies investigating healthcare teams often ignore important context variables of teams (e.g. team composition and size, task characteristics, team environment) that likely influence the effect that teamwork has on clinical performance.[13,14]

These inconsistencies in the teamwork literature may lead to confusion about the importance of teamwork in healthcare, thus giving voice to critics who hinder efforts to improve teamwork. We aim to address these problems with a meta-analytical study investigating the performance

1  
2  
3 implications of teamwork. A meta-analytical approach moves beyond existing reviews on  
4 teamwork in healthcare[9,15-18] and quantitatively tests if the widely advocated positive effect  
5 of teamwork on performance holds true. In addition, this approach allows us to investigate  
6 context variables as moderators that may influence the effect of teamwork on performance,  
7 meaning that this effect might be stronger or weaker under certain conditions. Previous meta-  
8 analyses[19,20] focused mainly on the effectiveness of team trainings but not on the effect of  
9 teamwork itself. This meta-analysis will generate strong quantitative evidence to inform the  
10 relevance of future interventions targeting teamwork in healthcare organizations.  
11  
12  
13  
14  
15  
16  
17  
18  
19  
20  
21

22 In the following we will first establish an operational definition of teamwork, elaborate on  
23 relevant contextual factors, and present our respective meta-analytic results and their  
24 interpretation.  
25  
26  
27  
28  
29  
30

### 31 **Teamwork and performance**

32  
33 *Teamwork* as a term is widely used and often difficult to grasp. However, we absolutely  
34 require a clear definition of teamwork especially for team trainings that target specific behaviors.  
35  
36 *Teamwork* is a process that describes interactions among team members who combine collective  
37 resources to resolve task demands (e.g. giving clear orders).[21,22] Teamwork or team processes  
38 can be differentiated from *taskwork*. *Taskwork* denotes a team's individual interaction with tasks,  
39 tools, machines and systems.[22] *Taskwork* is independent of other team members and is often  
40 described as *what* a team is doing whereas *teamwork* is *how* the members of a team are doing  
41 something with each other.[23] Therefore, *team performance* represents the accumulation of  
42 teamwork and taskwork (i.e. what the team actually does).[17]  
43  
44  
45  
46  
47  
48  
49  
50  
51  
52  
53  
54  
55  
56  
57  
58  
59  
60

1  
2  
3 Team performance is often described in terms of inputs, processes and outputs (IPO).[21,24-  
4  
5 26] *Outputs* like quality of care, errors or performance are influenced by team related *processes*  
6  
7 (i.e. teamwork) like communication, coordination or decision making. Furthermore, these  
8  
9 processes are influenced by various *inputs* like team members experience, task complexity, time  
10  
11 pressure and more. This IPO framework helps to systematize the mechanisms that predict team  
12  
13 performance and represents the basis for the selection of the teamwork studies included in our  
14  
15 meta-analysis.  
16  
17  
18  
19  
20  
21

### 22 **Contextual factors of teamwork effectiveness**

23  
24 Based on a large body of team research from various domains, we hypothesize that several  
25  
26 contextual and methodological factors might moderate the effectiveness of teamwork, indicating  
27  
28 that teamwork is more important under certain conditions.[27,28] Therefore, we investigate  
29  
30 several factors: (a) team characteristics (i.e. professional composition, team familiarity, team  
31  
32 size); (b) task type (i.e. routine vs. non-routine tasks); (c) two methodological factors related to  
33  
34 patient realism (i.e. simulated vs. real) and the type of performance measures used (i.e. process  
35  
36 vs. outcome performance). In the following we discuss these potentially moderating factors and  
37  
38 the proposed effects on teamwork.  
39  
40  
41

42 *Professional composition.* We distinguished between interprofessional and uniprofessional  
43  
44 teams. Interprofessional teams consist of members from various professions that must work  
45  
46 together in a coordinated fashion.[29] Diverse educational paths in interprofessional teams may  
47  
48 shape respective values, beliefs, attitudes and behaviors.[30] As a result team members with  
49  
50 different backgrounds might perceive and interpret the environment differently and have a  
51  
52 different understanding of how to work together. Therefore, we assume that explicit teamwork is  
53  
54 especially important in interprofessional teams compared to uniprofessional teams.  
55  
56  
57  
58  
59  
60



1  
2  
3 *Team familiarity.* If team members have worked together, they are familiar with their  
4 individual working styles; and roles and responsibilities are usually clear. If a team works  
5 together for the first time, this potential lack of familiarity and clarity might make teamwork  
6 even more important. Therefore, we differentiate between *real teams* that also work together in  
7 their everyday clinical practice and *experiential teams* that only came together for study  
8 purposes.  
9

10  
11  
12 *Team size.* Another factor that may moderate the relationship between teamwork and  
13 performance is team size. Since larger teams exhibit more linkages among members than smaller  
14 teams, they also face greater coordination challenges. Also, with increasing size teams have  
15 greater difficulty developing and maintaining role structures and responsibilities. For these  
16 reasons, we expect the influence of teamwork on clinical performance to be stronger in larger  
17 teams as compared to smaller teams.  
18

19  
20  
21 *Task type.* Routine situations are characterized by repetitive and unvarying actions (e.g.  
22 standard anaesthesia induction).[31] In contrast, non-routine situations exhibit more variation  
23 and uncertainty, requiring teams to be flexible and adaptive. Whereas team members mostly rely  
24 on pre-learned sequences during routine situations, during non-routine situations we assume that  
25 teamwork is more important in order for team members to resolve task demands.  
26

27  
28  
29 *Patient realism.* Authors highlight the importance of using medical simulators in  
30 education.[32] Therefore, we investigate the realism used in a study (simulated vs. real patients)  
31 as a potential methodological factor that influences the relationship between teamwork and  
32 performance. Studies conducted with medical simulators might be more standardized and less  
33 influenced by confounding variables than studies conducted with real patients. Therefore, results  
34 from simulation studies might show stronger relationships between the two variables. Further,  
35  
36  
37  
38  
39  
40  
41  
42  
43  
44  
45  
46  
47  
48  
49  
50  
51  
52  
53  
54  
55  
56  
57  
58  
59  
60

1  
2  
3 using simulated patients could cause individuals and teams to act differently than in real settings,  
4  
5 thereby distorting the results. However, in the last decade high-fidelity simulators have become  
6  
7 increasingly realistic, suggesting that the results from simulation studies generalize to real  
8  
9 environments. Including realism as a contextual factor in our analysis will reveal if the effects of  
10  
11 teamwork observed in simulation compare with real life settings. Better understanding would  
12  
13 provide important insights about simulation use in teamwork studies.  
14  
15

16  
17 *Performance measures.* As a second methodological factor, we expect that the type of  
18  
19 performance measure used in a study influences the reported teamwork effectiveness. The  
20  
21 literature usually differentiates between process- and outcome-related aspects of  
22  
23 performance.[33,34] Process performance measures are action-related aspects and refer to  
24  
25 adequate behaviour during procedures (e.g. adhering to guidelines), making them easier to  
26  
27 assess. Outcome performance measures (e.g. infection rates after operations) follow team  
28  
29 actions, with assessment occurring later than process measures. Outcome performance measures  
30  
31 suffer from several factors: greater sensitivity to confounding variables (e.g. comorbidities),  
32  
33 assessment challenges, and greater difficulty linking team processes to outcomes. Looking at the  
34  
35 predictors of the survival of cardiac arrest patients illustrates the difference between the two  
36  
37 types of performance measures. The main predictors for the survival (i.e. performance outcome)  
38  
39 of a cardiac arrest patient are “*duration of the arrest*” and “*age of the patient less than 70*”.[35]  
40  
41 Although a team delivers perfect basic life support (i.e. high process performance) the patient  
42  
43 can still die (i.e. low outcome performance). Due to these methodological considerations, we  
44  
45 expect that studies assessing process performance report a stronger relationship between  
46  
47 teamwork and performance than studies assessing outcome performance.  
48  
49  
50  
51  
52  
53  
54  
55  
56  
57  
58  
59  
60

## METHODS

The study was conducted based on the recommendations of the PRISMA statement[36] as well as established guidelines in social sciences.[37,38] Through the combination of studies in the meta-analytical process, we will increase the statistical power and provide an accurate estimation of the true impact that teamwork has on performance.

### Search strategy

We applied the following search strategy to select relevant papers: a) an electronic search of the data base PubMed (no limit was placed on date of publication, last search June 2018) using the key words *teamwork*, *coordination*, *decision making*, *leadership* and *communication* in combination with *patient safety*, *clinical performance*, the final syntax for PubMed is available online (Supplementary File), b) a manual backwards search for all references cited by 8 systematic literature reviews that focus on teamwork or non-technical skills in various healthcare domains ,[9,16,18,39-43] c) a manual backwards search for all references cited in studies we included in our meta-analysis, d) a manual forward search to identify studies that cite the studies we included in our meta-analysis, e) identification of relevant unpublished manuscripts via e-mail from authors currently investigating medical teams using specific mailing lists.

### Inclusion criteria

Studies were included if a construct complied to the definition of teamwork processes outlined in the introduction (e.g. coordination, communication). In addition, studies needed to investigate the relationship between at least one teamwork process and a performance measure (e.g. patient outcome). When studies reported multiple estimates of the same relationship from the same sample (e.g. between coordination and more than one indicator of performance), those

1  
2  
3 correlations were examined separately only as appropriate for sub-analyses, but an average  
4  
5 correlation was computed for all global meta-analyses of those relationships to maintain  
6  
7 independence.[44] All articles included in this meta-analysis are listed in Table 1 and Table 2.  
8  
9

10 For the criterion level of analysis, we included only effect sizes at the team level and not on  
11  
12 an individual level. Therefore, the performance measure had to be clearly linked to a team. This  
13  
14 approach aligns with research that strongly recommends against mixing levels of analysis in  
15  
16 meta-analytic integrations.[45,46]  
17  
18

19 Two reviewers independently screened titles and abstracts from articles yielded in the search.  
20  
21 Afterwards full texts of all relevant articles were obtained and screened by the same two  
22  
23 reviewers. Agreement was above 90%. Any disagreement in the selection process was resolved  
24  
25 through consensus discussion.  
26  
27

## 28 **Data extraction**

29  
30 With the help of a jointly developed coding scheme, studies were independently coded by  
31  
32 one of the authors (JS) and another rater, both with a background in industrial psychology and  
33  
34 human factors. 20% of the studies were rated by both coders. Inter-coder agreement was above  
35  
36 90%. Any disagreement was resolved through discussion. The data extracted comprised details  
37  
38 of the authors and publication as well as important study characteristics and statistical  
39  
40 relationships between a teamwork variable and performance (Table 2).  
41  
42  
43  
44  
45  
46

## 47 **Coding of team characteristics**

48  
49 The *professional composition* of teams was coded either as “Interprofessional” if a team  
50  
51 consisted of members from different professions (e.g. nurses and physicians) or as  
52  
53 “Uniprofessional” if the members of the teams were of the same profession. *Team size* was  
54  
55  
56  
57  
58  
59  
60

1  
2  
3 coded as the number of members (average number if team size varied) of the investigated teams.  
4  
5 Team familiarity was coded either as “experimental” or “real”. “Real” indicates that the team  
6  
7 members also worked together in their everyday clinical practice. “Experimental” means that the  
8  
9 teams only worked together during the study.  
10  
11  
12  
13

#### 14 Coding of task characteristics

15  
16  
17 *Task type* was coded either as “Routine task” or “Non-routine task”. We defined “Non-  
18  
19 routine tasks” as unexpected events that require flexible behavior often under time-pressure (e.g.  
20  
21 emergency situations). “Routine tasks” describe previously planned standard procedures (e.g.  
22  
23 standard anesthesia induction, planned surgery).  
24  
25  
26  
27

#### 28 Coding of methodological factors

29  
30  
31 *Patient realism* was either coded as “Real patients” or “Simulated patients”. “Simulated  
32  
33 patient” included a simulated or standardized patient whereas “Real patient” included real  
34  
35 patients in clinical settings.  
36  
37

38  
39 *Clinical performance measures* were coded either as “Outcome performance” or “Process  
40  
41 performance”. [34,47] “Outcome performance” includes an outcome that is measured after the  
42  
43 treatment process (e.g. infection rate, mortality). We focused only on patient-related outcomes  
44  
45 and not on team outcomes (e.g. team satisfaction). “Process performance” describes the  
46  
47 evaluation of the treatment process and describes how well the process was executed (e.g.  
48  
49 adherence to guidelines through expert rating). Process performance measures are often based on  
50  
51 official guidelines and extensive expert knowledge.[48] Thus, we assumed that process  
52  
53 performance closely relates to patient outcomes.  
54  
55  
56  
57  
58  
59  
60

Table 1. Descriptions of study objectives, settings and description of teamwork process and outcome measures

| Authors                                     | Year | Main study objectives                                                                                                            | Participants and setting                                                                                                                                                | Teamwork process measure                                                                                                        | Outcome measure                                                              |
|---------------------------------------------|------|----------------------------------------------------------------------------------------------------------------------------------|-------------------------------------------------------------------------------------------------------------------------------------------------------------------------|---------------------------------------------------------------------------------------------------------------------------------|------------------------------------------------------------------------------|
| Amacher, Schumacher, Legeret, et al.[64]    | 2017 | To compare female and male rescuers in regard to cardiopulmonary resuscitation and leadership performance                        | Video observation of medical students managing cardiopulmonary resuscitation in a high-fidelity patient simulator                                                       | Structured observation of secure leadership statements within teams                                                             | Time until start chest compression<br>Hands-on time within first 180 seconds |
| Brogaard, Kierkegaard, Hvidmand, et al.[65] | 2018 | To investigate the relationship between non-technical skills and clinical performance in obstetric teams                         | Video observation of obstetric teams (Obstetricians, obstetric nurse, anaesthesiologists) managing real-life emergencies (postpartum haemorrhage)                       | Assessment of non-technical skills using a behaviourally anchored rating scale (ATOP; Assessment of Obstetric Team Performance) | Checklist tool for clinical performance (TeamOBS-PPH)                        |
| Burtscher, Kolbe, Wacker, et al.[66]        | 2011 | To investigate how team mental models and team monitoring behaviour interact to predict team performance in anaesthesia          | Video observation of anaesthesia teams (residents, nurses) conducting a standard anaesthesia induction using a high-fidelity patient simulator                          | Structured observation of team monitoring behaviour                                                                             | Checklist based expert rating                                                |
| Burtscher, Manser, Kolbe, et al.[67]        | 2011 | To investigate the relationship between adaptation of team coordination and clinical performance in response to a critical event | Video observation of anaesthesia teams (resident, nurse) conducting a standard anaesthesia induction including a critical event using a high-fidelity patient simulator | Structured observation of team coordination                                                                                     | Reaction time related to the critical event                                  |
| Burtscher, Wacker, Grote, et al.[68]        | 2010 | To examine the role of anaesthesia teams' adaptive coordination in managing changing situational demands                         | Video observation of anaesthesia teams (residents, nurses, students) conducting standard anaesthesia inductions with non-routine events                                 | Structured observation of team coordination                                                                                     | Checklist based expert rating                                                |

|    |                      |      |                                |                                  |                          |                     |
|----|----------------------|------|--------------------------------|----------------------------------|--------------------------|---------------------|
| 1  |                      |      |                                |                                  |                          |                     |
| 2  |                      |      |                                |                                  |                          |                     |
| 3  | Carlson, Min,        | 2009 | To explore the relationship    | Video observation of trainees    | Assessment of team       | Checklist based     |
| 4  | Bridges[10]          |      | between team behaviour and     | participating in a simulated     | behaviour using a        | expert rating       |
| 5  |                      |      | the delivery of an appropriate | event involving the presentation | behaviourally            |                     |
| 6  |                      |      | standard of care specific to   | of acute dyspnoea                | anchored rating scale    |                     |
| 7  |                      |      | the simulated case             |                                  | (leadership and team     |                     |
| 8  |                      |      |                                |                                  | behaviour                |                     |
| 9  |                      |      |                                |                                  | measurement tool)        |                     |
| 10 | Catchpole, Giddings, | 2007 | To investigate if effective    | Live observation of surgical     | Observation of non-      | Assessment of minor |
| 11 | Wilkinson, et        |      | teamwork can prevent the       | teams conducting paediatric      | technical skills using a | problems,           |
| 12 | al.[69]              |      | development of serious         | cardiac and orthopaedic          | behaviourally            | intraoperative      |
| 13 |                      |      | situations and provide         | surgeries                        | anchored rating scale    | performance and     |
| 14 |                      |      | evidence for improvements in   |                                  | (NOTECHS scoring         | duration of surgery |
| 15 |                      |      | training and systems           |                                  | system)                  |                     |
| 16 | Catchpole, Mishra,   | 2008 | To analyse the effects of      | Observation of surgical teams    | Observation of non-      | Operating time and  |
| 17 | Handa, et al.[70]    |      | surgical, aesthetic, and       | conducting laparoscopic          | technical skills using a | errors in surgical  |
| 18 |                      |      | nursing teamwork skills on     | cholecystectomies and carotid    | behaviourally            | technique           |
| 19 |                      |      | technical outcomes             | endarterectomies                 | anchored rating scale    |                     |
| 20 |                      |      |                                |                                  | (NOTECHS scoring         |                     |
| 21 |                      |      |                                |                                  | system)                  |                     |
| 22 | Cooper,              | 1999 | To examine the relationship    | Video observation of emergency   | Survey about leadership  | Checklist based     |
| 23 | Wakelam[71]          |      | between leadership behaviour,  | teams managing full              | behaviour using the      | expert rating       |
| 24 |                      |      | team dynamics and task         | cardiopulmonary arrests with a   | Leadership Behaviour     |                     |
| 25 |                      |      | performance                    | resuscitation attempt lasting    | Description              |                     |
| 26 |                      |      |                                | longer than 3 minutes            | Questionnaire            |                     |
| 27 | Davenport,           | 2007 | To measure the impact of       | Survey of staff on general and   | Survey about teamwork    | Surgical morbidity  |
| 28 | Henderson,           |      | organizational climate safety  | vascular surgery services        | climate, level of        | Surgical mortality  |
| 29 | Mosca, et al.[72]    |      | factors on risk-adjusted       |                                  | communication and        |                     |
| 30 |                      |      | surgical morbidity and         |                                  | collaboration with       |                     |
| 31 |                      |      | mortality                      |                                  | surgeon                  |                     |
| 32 | El Bardissi,         | 2008 | To identify patterns of        | Live observation of surgical     | Structured observation   | Surgical technical  |
| 33 | Wiegmann,            |      | teamwork failures that would   | teams conducting cardiac         | of teamwork failures     | errors              |
| 34 | Henrickson, et       |      | benefit from intervention in   | surgery                          | that disrupted the flow  |                     |
| 35 | al.[73]              |      | the cardiac surgical setting   |                                  | of the operation         |                     |
| 36 |                      |      |                                |                                  |                          |                     |
| 37 | Gillespie, Chaboyer, | 2012 | To investigate how various     | Live observation of surgical     | Structured observation   | Deviation from      |
| 38 | Fairweather[74]      |      | human factors variables,       | teams across 10 specialties      | of numbers of            | expected length of  |
| 39 |                      |      | extend the expected length of  |                                  | communication            | operation           |
| 40 |                      |      | an operation                   |                                  | failures                 |                     |
| 41 |                      |      |                                |                                  |                          |                     |
| 42 |                      |      |                                |                                  |                          |                     |
| 43 |                      |      |                                |                                  |                          |                     |
| 44 |                      |      |                                |                                  |                          |                     |
| 45 |                      |      |                                |                                  |                          |                     |
| 46 |                      |      |                                |                                  |                          |                     |
| 47 |                      |      |                                |                                  |                          |                     |

|    |                     |      |                                  |                                    |                         |                       |
|----|---------------------|------|----------------------------------|------------------------------------|-------------------------|-----------------------|
| 1  |                     |      |                                  |                                    |                         |                       |
| 2  |                     |      |                                  |                                    |                         |                       |
| 3  | Kolbe, Burtscher,   | 2012 | To test the relationship between | Observation of 2-person (nurse,    | Structured observation  | Checklist based       |
| 4  | Wacker, et al.[75]  |      | speaking up and technical        | resident) ad hoc anaesthesia       | of speaking up          | expert rating         |
| 5  |                     |      | team performance in              | teams performing simulated         | behaviour               |                       |
| 6  |                     |      | anaesthesia.                     | inductions of general              |                         |                       |
| 7  |                     |      |                                  | anaesthesia with minor             |                         |                       |
| 8  |                     |      |                                  | nonroutine events                  |                         |                       |
| 9  | Kuenzle, Zala-Mezo, | 2009 | To investigate shared leadership | Observation of 2-person (nurse,    | Structured observation  | Reaction time to      |
| 10 | Wacker, et al.[76]  |      | patterns during anaesthesia      | resident) ad hoc anaesthesia       | of leadership           | nonroutine event      |
| 11 |                     |      | induction and to show how        | teams performing simulated         | behaviour               |                       |
| 12 |                     |      | they are linked to team          | inductions of general              |                         |                       |
| 13 |                     |      | performance                      | anaesthesia with a nonroutine      |                         |                       |
| 14 |                     |      |                                  | event (asystole)                   |                         |                       |
| 15 | Manojilovich,       | 2009 | To determine the relationships   | A survey was conducted with        | Survey about perception | Ventilator-associated |
| 16 | Antonakos, David,   |      | between patients' outcomes       | nurses on various ICU wards        | of nurse-physician      | pneumonia             |
| 17 | et al.[77]          |      | and nurses' perceptions of       |                                    | communication using     | Bloodstream           |
| 18 |                     |      | communication and                |                                    | the ICU-nurse           | infections            |
| 19 |                     |      | characteristics of the practice  |                                    | physician               | Pressure ulcers       |
| 20 |                     |      | environment.                     |                                    | questionnaire           | Acute physiology and  |
| 21 |                     |      |                                  |                                    |                         | chronic health        |
| 22 |                     |      |                                  |                                    |                         | evaluation score      |
| 23 | Manser, Bogdanovic, | 2015 | To investigate surgeons team     | Live observation of surgical       | Structured observation  | Checklist based       |
| 24 | Arora, et al.[78]   |      | management skills and its        | teams managing a simulated         | of team management      | expert rating         |
| 25 |                     |      | influence on performance         | laparoscopic cholecystectomy       | using the ComEd-E       |                       |
| 26 |                     |      |                                  |                                    | observation system      |                       |
| 27 | Marsch, Müller,     | 2004 | To determine whether and how     | Observation of healthcare worker   | Structured observation  | Checklist based       |
| 28 | Marquardt, et       |      | human factors affect the         | (nurse, physician) managing a      | of task distribution,   | expert rating         |
| 29 | al.[79]             |      | quality of cardiopulmonary       | cardiac arrest due to ventricular  | information transfer    |                       |
| 30 |                     |      | resuscitation                    | fibrillation using a high-fidelity | and leadership          |                       |
| 31 |                     |      |                                  | patient simulator                  | behaviour within the    |                       |
| 32 |                     |      |                                  |                                    | team                    |                       |
| 33 | Mazzocco, Petitti,  | 2009 | To determine if patients of      | Live observation of surgical       | Structured observation  | Postoperative         |
| 34 | Fong, et al.[80]    |      | teams with good teamwork         | teams managing a variety of        | of information sharing, | complications and     |
| 35 |                     |      | had better outcomes than         | surgical procedures                | inquiry for relevant    | death                 |
| 36 |                     |      | those with poor teamwork         |                                    | information and         |                       |
| 37 |                     |      |                                  |                                    | vigilance and           |                       |
| 38 |                     |      |                                  |                                    | awareness using a       |                       |
| 39 |                     |      |                                  |                                    | behaviourally           |                       |
| 40 |                     |      |                                  |                                    | anchored rating scale   |                       |
| 41 |                     |      |                                  |                                    |                         |                       |
| 42 |                     |      |                                  |                                    |                         |                       |
| 43 |                     |      |                                  |                                    |                         |                       |
| 44 |                     |      |                                  |                                    |                         |                       |
| 45 |                     |      |                                  |                                    |                         |                       |
| 46 |                     |      |                                  |                                    |                         |                       |
| 47 |                     |      |                                  |                                    |                         |                       |



|    |                      |      |                                 |                                   |                          |                      |
|----|----------------------|------|---------------------------------|-----------------------------------|--------------------------|----------------------|
| 1  |                      |      |                                 |                                   |                          |                      |
| 2  |                      |      |                                 |                                   |                          |                      |
| 3  | Mishra, Catchpole,   | 2008 | To report on the development    | Live observation of surgical      | Assessment of non-       | Surgical technical   |
| 4  | Dale, et al.[81]     |      | and evaluation of a method      | teams conducting laparoscopic     | technical skills using a | errors assessed      |
| 5  |                      |      | for measuring operating-        | cholecystectomy                   | behaviourally            | with the OCHRA-      |
| 6  |                      |      | theatre teamwork quality        |                                   | anchored rating scale    | tool                 |
| 7  |                      |      |                                 |                                   | (NOTECHS scoring         |                      |
| 8  |                      |      |                                 |                                   | system)                  |                      |
| 9  | Schmutz, Hoffmann,   | 2015 | To investigate the moderating   | Video observation of paediatric   | Structured observation   | Checklist based      |
| 10 | Heimberg, et         |      | effect of task characteristics  | teams managing various            | of closed loop           | expert rating        |
| 11 | al.[82]              |      | on the relationship between     | paediatric emergencies using a    | communication, task      |                      |
| 12 |                      |      | coordination and performance    | high-fidelity patient simulator   | distribution and         |                      |
| 13 |                      |      |                                 |                                   | provide information      |                      |
| 14 |                      |      |                                 |                                   | without request using    |                      |
| 15 |                      |      |                                 |                                   | the CoMeT-E              |                      |
| 16 |                      |      |                                 |                                   | observation system       |                      |
| 17 | Siassakos, Bristowe, | 2012 | To investigate the relationship | Video observation of teams        | Structured observation   | Timely               |
| 18 | Draycott, et al.[83] |      | between patient satisfaction    | (physicians, midwives)            | of closed loop           | administration of    |
| 19 |                      |      | and communication               | managing obstetric emergencies    | communication            | magnesium            |
| 20 |                      |      |                                 | in secondary and tertiary         |                          | sulphate             |
| 21 |                      |      |                                 | maternity units                   |                          |                      |
| 22 | Siassakos, Fox,      | 2011 | To determine whether team       | Video observation of healthcare   | Assessment of generic    | Clinical efficiency  |
| 23 | Crofts, et al.[84]   |      | performance in a simulated      | professionals (physician,         | teamwork using a         | score                |
| 24 |                      |      | emergency is related to         | midwives) managing various        | behaviourally            |                      |
| 25 |                      |      | generic teamwork skills and     | emergencies using a high-         | anchored rating scale    |                      |
| 26 |                      |      | behaviors                       | fidelity patient simulator        | (teamwork analytical     |                      |
| 27 |                      |      |                                 |                                   | tool)                    |                      |
| 28 | Thomas, Sexton,      | 2006 | To investigate the relationship | Video observation of neonatal     | Structured observation   | Compliance with      |
| 29 | Lasky, et al.[85]    |      | of team behaviours during       | care teams managing a             | of communication,        | Neonatal             |
| 30 |                      |      | delivery room care and          | resuscitation during a caesarean  | team management and      | Resuscitation        |
| 31 |                      |      | behaviours relate to the        | section                           | leadership               | Program guidelines   |
| 32 |                      |      | quality of care                 |                                   |                          |                      |
| 33 | Tschan, Semmer,      | 2006 | To investigate the influence of | Video observation of medical      | Structured observation   | Clinical performance |
| 34 | Gautschi, et al.[86] |      | human factors on team           | emergency teams (senior doctor,   | of directive leadership  | assessed based on a  |
| 35 |                      |      | performance in medical          | resident, nurse) managing a       | and structuring inquiry  | time-based coding    |
| 36 |                      |      | emergency driven groups         | cardiac arrest in a high-fidelity |                          | of observable        |
| 37 |                      |      |                                 | patient simulator                 |                          | technical acts       |
| 38 |                      |      |                                 |                                   |                          |                      |
| 39 |                      |      |                                 |                                   |                          |                      |
| 40 |                      |      |                                 |                                   |                          |                      |
| 41 |                      |      |                                 |                                   |                          |                      |
| 42 |                      |      |                                 |                                   |                          |                      |
| 43 |                      |      |                                 |                                   |                          |                      |
| 44 |                      |      |                                 |                                   |                          |                      |
| 45 |                      |      |                                 |                                   |                          |                      |
| 46 |                      |      |                                 |                                   |                          |                      |
| 47 |                      |      |                                 |                                   |                          |                      |

|    |                       |      |                                 |                                   |                          |                   |
|----|-----------------------|------|---------------------------------|-----------------------------------|--------------------------|-------------------|
| 1  |                       |      |                                 |                                   |                          |                   |
| 2  |                       |      |                                 |                                   |                          |                   |
| 3  | Tschan, Semmer,       | 2009 | To investigate the influence of | Video observation of groups of    | Structured observation   | Accuracy of       |
| 4  | Gurtner, et al.[87]   |      | communication on diagnostic     | physicians diagnosing a difficult | of the diagnostic        | diagnosis         |
| 5  |                       |      | accuracy in ambiguous           | patient with an anaphylactic      | information that have    |                   |
| 6  |                       |      | situations                      | shock in a high-fidelity patient  | been considered,         |                   |
| 7  |                       |      |                                 | simulator                         | explicit reasoning and   |                   |
| 8  |                       |      |                                 |                                   | talking to the room      |                   |
| 9  |                       |      |                                 |                                   |                          |                   |
| 10 | Westli, Johnsen, Eid, | 2010 | To investigate whether          | Video observation of trauma       | Assessment of non-       | Checklist based   |
| 11 | et al.[88]            |      | demonstrated teamwork skills    | teams (surgeons,                  | technical skills using a | expert rating     |
| 12 |                       |      | and behaviour indicating        | anaesthesiologists, nurses,       | behaviourally            |                   |
| 13 |                       |      | shared mental models would      | radiographers) in a high-fidelity | anchored rating scale    |                   |
| 14 |                       |      | be associated with improved     | patient simulator                 | (ANTS and ATOM           |                   |
| 15 |                       |      | medical management              |                                   | scoring system)          |                   |
| 16 | Wiegmann, El          | 2007 | To investigate surgical errors  | Live observation of surgical      | Structured observation   | Structured        |
| 17 | Bardissi, Dearani,    |      | and their relationship to       | teams conducting cardiac          | of teamwork and          | observation of    |
| 18 | et al.[89]            |      | surgical flow disruptions to    | surgery operations                | communication            | surgical errors   |
| 19 |                       |      | understand better the effect of |                                   | failures                 | during the        |
| 20 |                       |      | these disruptions on surgical   |                                   |                          | operation         |
| 21 |                       |      | errors and patient safety       |                                   |                          |                   |
| 22 | Williams, Lasky,      | 2010 | To describe relationships       | Video observation of intensive    | Structured observation   | Structured        |
| 23 | Dannemiller, et       |      | between teamwork                | care teams managing neonatal      | of teamwork behaviour    | observation of    |
| 24 | al.[90]               |      | behaviours and errors during    | resuscitations                    | (vigilance, workload     | errors (non-      |
| 25 |                       |      | neonatal resuscitation          |                                   | management,              | compliance with   |
| 26 |                       |      |                                 |                                   | information sharing,     | guidelines)       |
| 27 |                       |      |                                 |                                   | inquiry, assertion)      |                   |
| 28 | Wright, Phillips-     | 2009 | To test if observer ratings of  | Video observation of teams        | Observation using a      | Checklist based   |
| 29 | Bute, Petrusa, et     |      | team skills will correlate with | consisting of medical students    | behaviourally            | expert rating     |
| 30 | al.[91]               |      | objective measures of clinical  | performing low-fidelity           | anchored rating scale    |                   |
| 31 |                       |      | performance                     | classroom based patient           | for teamwork skills      |                   |
| 32 |                       |      |                                 | assessment and high-fidelity      | (assertiveness,          |                   |
| 33 |                       |      |                                 | simulation emergent care.         | decision-making,         |                   |
| 34 |                       |      |                                 |                                   | situation assessment,    |                   |
| 35 |                       |      |                                 |                                   | leadership,              |                   |
| 36 | Yamada, Fuerch,       | 2016 | To investigate the effect of    | Video observation of teams        | Structured observation   | Error rate        |
| 37 | Halamek[92]           |      | standardized communication      | (Neonatologists, neonatal nurse   | of standardised          | Time to initiate  |
| 38 |                       |      | techniques on errors during     | practitioners, neonatology        | communication            | positive pressure |
| 39 |                       |      | resuscitation                   | fellows) managing neonatal        |                          | ventilation       |
| 40 |                       |      |                                 | resuscitation                     |                          | Time to chest     |
| 41 |                       |      |                                 |                                   |                          | compression       |
| 42 |                       |      |                                 |                                   |                          |                   |
| 43 |                       |      |                                 |                                   |                          |                   |
| 44 |                       |      |                                 |                                   |                          |                   |
| 45 |                       |      |                                 |                                   |                          |                   |
| 46 |                       |      |                                 |                                   |                          |                   |
| 47 |                       |      |                                 |                                   |                          |                   |

Table 2. Studies, effect sizes and moderator variables included in the meta-analytic database

| Authors                                       | Year | Study goal | Participants and setting | No. of teams | Professional composition | Team familiarity | Average team size | Task type             | Patient realism | Performance measure |
|-----------------------------------------------|------|------------|--------------------------|--------------|--------------------------|------------------|-------------------|-----------------------|-----------------|---------------------|
| Amacher, Schumacher, Legeret, et al.[64]      | 2017 | .11        | Emergency medicine       | 72           | Uniprofessional          | Experimental     | 3                 | Non-routine           | Simulated       | Process             |
| Brogaard, Kierkegaard, Hvidmand, et al.[65]   | 2018 | .43        | Obstetrics               | 99           | Interprofessional        | Real             | 5                 | Non-routine           | Real            | Process             |
| Burtscher, Kolbe, Wacker, et al.[66]          | 2011 | -.27       | Anaesthesia              | 31           | Interprofessional        | Experimental     | 2                 | Routine               | Simulated       | Process             |
| Burtscher, Manser, Kolbe, et al.[67]          | 2011 | .19        | Anaesthesia              | 15           | Interprofessional        | Experimental     | 2                 | Routine & non-routine | Simulated       | Process             |
| Burtscher, Wacker, Grote, et al.[68]          | 2010 | .07        | Anaesthesia              | 22           | Interprofessional        | Real             | 3                 | Non-routine           | Real            | Process             |
| Carlson, Min, Bridges[10], b                  | 2009 | .83        | Emergency medicine       | 44           | Uniprofessional          | Experimental     | 2.6               | Non-routine           | Simulated       | Process             |
| Catchpole, Giddings, Wilkinson, et al.[69]    | 2007 | .45†       | Surgery                  | 24           | Interprofessional        | Real             | 9                 | Non-routine           | Real            | Process             |
|                                               | 2007 | .29†       | Surgery                  | 18           | Interprofessional        | Real             | 5                 | Routine               | Real            | Process             |
| Catchpole, Mishra, Handa, et al.[70]          | 2008 | .36†       | Surgery                  | 26           | Interprofessional        | Real             |                   | Routine               | Real            | Process             |
|                                               | 2008 | .09†       | Surgery                  | 22           | Interprofessional        | Real             |                   | Routine               | Real            | Process             |
| Cooper, Wakelam[71]                           | 1999 | .50        | General care             | 20           | Interprofessional        | Real             | 4                 | Routine               | Real            | Process             |
| Davenport, Henderson, Mosca, et al.[72]       | 2007 | .17        | Surgery                  | 52           | Interprofessional        | Real             |                   | Routine               | Real            | Outcome             |
| El Bardissi, Wiegmann, Henrickson, et al.[73] | 2008 | .67        | Surgery                  | 31           | Interprofessional        | Real             | 7                 | Routine               | Real            | Process             |
| Gillespie, Chaboyer, Fairweather[74]          | 2012 | .23        | Surgery                  | 160          | Interprofessional        | Real             | 6                 | Routine               | Real            | Process             |
| Kolbe, Burtscher, Wacker, et al.[75]          | 2012 | .33        | Anaesthesia              | 31           | Interprofessional        | Real             | 2                 | Non-routine           | Simulated       | Process             |
| Kuenzle, Zala-Mezo, Wacker, et al.[76]        | 2009 | .56        | Anaesthesia              | 12           | Interprofessional        | Real             | 2                 | Routine               | Simulated       | Process             |
| Manojilovich, Antonakos, David, et al.[77]    | 2009 | .11        | Intensive care           | 25           | Uniprofessional          | Real             | 36                | Routine               | Real            | Outcome             |

|    |                                     |      |     |                         |     |                   |              |      |             |           |         |
|----|-------------------------------------|------|-----|-------------------------|-----|-------------------|--------------|------|-------------|-----------|---------|
| 1  |                                     |      |     |                         |     |                   |              |      |             |           |         |
| 2  |                                     |      |     |                         |     |                   |              |      |             |           |         |
| 3  | Manser, Bogdanovic, Arora, et       | 2015 | .39 | Surgery                 | 19  | Interprofessional | Experimental | 5    | Routine     | Simulated | Process |
| 4  | al.[78]                             |      |     |                         |     |                   |              |      |             |           |         |
| 5  | Marsch, Müller, Marquardt, et       | 2004 | .23 | Intensive               | 16  | Interprofessional | Experimental | 3    | Non-routine | Simulated | Process |
| 6  | al.[79]                             |      |     | care                    |     |                   |              |      |             |           |         |
| 7  | Mazzocco, Petitti, Fong, et al.[80] | 2009 | .11 | Surgery                 | 293 | Interprofessional | Real         | 6    | Routine     | Real      | Outcome |
| 8  |                                     |      |     |                         |     |                   |              |      |             |           |         |
| 9  | Mishra, Catchpole, Dale, et         | 2008 | .05 | Surgery                 | 26  | Interprofessional | Real         | 6    | Routine     | Real      | Process |
| 10 | al.[81]                             |      |     |                         |     |                   |              |      |             |           |         |
| 11 | Schmutz, Hoffmann, Heimberg,        | 2015 | .12 | Emergency               | 68  | Interprofessional | Real         | 6    | Non-routine | Simulated | Process |
| 12 | et al.[82]                          |      |     | medicine                |     |                   |              |      |             |           |         |
| 13 | Siassakos, Bristowe, Draycott, et   | 2012 | .66 | Obstetrics              | 19  | Interprofessional | Real         | 6    | Non-routine | Simulated | Process |
| 14 | al.[83]                             |      |     |                         |     |                   |              |      |             |           |         |
| 15 | Siassakos, Fox, Crofts, et al.[84]  | 2011 | .55 | Emergency               | 24  | Interprofessional | Experimental | 6    | Non-routine | Simulated | Process |
| 16 |                                     |      |     | medicine/<br>obstetrics |     |                   |              |      |             |           |         |
| 17 | Thomas, Sexton, Lasky, et al.[85]   | 2006 | .23 | Neonatal                | 132 | Interprofessional | Real         | 5    | Non-routine | Real      | Process |
| 18 |                                     |      |     | care                    |     |                   |              |      |             |           |         |
| 19 | Tschan, Semmer, Gautschi, et        | 2006 | .23 | Emergency               | 21  | Interprofessional | Experimental | 5    | Non-routine | Simulated | Process |
| 20 | al.[86]                             |      |     | medicine                |     |                   |              |      |             |           |         |
| 21 | Tschan, Semmer, Gurtner, et         | 2009 | .37 | Emergency               | 20  | Uniprofessional   | Experimental | 2.65 | Non-routine | Simulated | Outcome |
| 22 | al.[87]                             |      |     | medicine                |     |                   |              |      |             |           |         |
| 23 | Westli, Johnsen, Eid, et al.[88]    | 2010 | .18 | Emergency               | 27  | Interprofessional | Real         | 5.1  | Non-routine | Simulated | Process |
| 24 |                                     |      |     | medicine                |     |                   |              |      |             |           |         |
| 25 | Wiegmann, El Bardissi, Dearani,     | 2007 | .56 | Surgery                 | 31  | Interprofessional | Real         |      | Routine     | Real      | Process |
| 26 | et al.[89]                          |      |     |                         |     |                   |              |      |             |           |         |
| 27 | Williams, Lasky, Dannemiller, et    | 2010 | .18 | Neonatal                | 12  | Interprofessional | Real         | 5    | Non-routine | Real      | Process |
| 28 | al.[90]                             |      |     | care                    |     |                   |              |      |             |           |         |
| 29 | Wright, Phillips-Bute, Petrusa, et  | 2009 | .81 | General care            | 9   | Uniprofessional   | Experimental | 4    | Non-routine | Simulated | Process |
| 30 | al.[91]                             |      |     |                         |     |                   |              |      |             |           |         |
| 31 | Yamada, Fuerch, Halamek[92]         | 2016 | .11 | Emergency               | 13  | Interprofessional | Experimental | 3    | Non-routine | Simulated | Process |
| 32 |                                     |      |     | medicine                |     |                   |              |      |             |           |         |
| 33 |                                     |      |     |                         |     |                   |              |      |             |           |         |

<sup>a</sup> Effect sizes ( $r$ ) with an † represent an average for a single sample and a single outcome and have been combined for this meta-analysis.

<sup>b</sup> Carlson, Min & Bridges has been identified as an outlier and therefore excluded from the analysis

## Statistical Analysis

Different types of effect sizes (e.g. Odds ratio,  $F$  values, and  $r$ ) have been reported in the original studies. We therefore converted the different effect sizes to a common metric, namely  $r$  using the formulas provided by Borenstein et al.[49] and Walker.[50] Moreover, some samples contained effect sizes of teamwork with two or more measures of performance. Because independence of the included effects sizes is required for a meta-analysis,[44,51] we used Fisher's  $z$  score to average the multiple correlations from the same sample. The correlations were weighted for sample size. However, in contrast to many meta-analyses in social sciences, the correlations were not adjusted for measurement reliability. This is because information about the measurement reliability could not be compared (Kappa vs. Cronbach Alpha) or were not available at all for the majority of studies. Therefore, we report uncorrected, sample-size weighted mean correlation, its 95% confidence interval (CI), and the 80% credibility interval (CR). The CI reflects the accuracy of a point estimate and can be used to examine the significance of the effect size estimates, whereas the CR refers to the deviation of these estimates and informs us about the existence of possible moderators.

Random-effects models were estimated based on two considerations.[52] First, we expected study heterogeneity to be high given the different study design characteristics such as *patient realism* ("Real patient" vs. "Simulated patient"), *task type* ("Routine task" vs. "Non-routine task"), and different forms of performance measures. Second, we aimed to provide an inference on the average effect in the entire population of studies from which the included studies are assumed to be a random selection of it. Therefore, random-effects models were estimated.[52] These models were calculated by the restricted maximum-likelihood estimator, an efficient and unbiased estimator.[53] Since we included only descriptive studies and no

1  
2  
3 interventions we only included the sample size of the individual studies as a potential bias into  
4  
5 the meta-analysis.  
6

7  
8 The estimation of meta-analytical models including the outlier analyses were performed  
9  
10 with the package “metafor” from the programming language and statistical environment R.[52]  
11  
12

## 13 14 15 **RESULTS**

16  
17 The online search resulted in 2002 articles (Figure 1). Based on title and abstract 67 articles  
18  
19 were selected for a full text review. Full text examination, forward and backward search of  
20  
21 selected articles and relevant reviews resulted in 30 studies coming from 28 articles (Two  
22  
23 publications presented two independent studies in one publication[69,70]). Two additional  
24  
25 studies were identified via contacting authors directly and have been presented at conferences in  
26  
27 the past.[65,78] This led to a total of 32 studies coming from 30 articles. Following suggestions  
28  
29 by Viechtbauer and Cheung,[54] outliers were examined using the externally standardized  
30  
31 residual score. One case (Carlson et al.,[10]  $r = .89$ ,  $n = 44$ , standardized residual score = 4.26)  
32  
33 was identified as outlier and therefore excluded from further analyses, resulting in a final sample  
34  
35 size of  $k = 31$ .  
36  
37

38  
39  
40 Table 1 provides a qualitative description of the selected articles including study objectives,  
41  
42 the setting in which the studies were carried out and a description of the teamwork processes as  
43  
44 well as the outcome measures that were assessed. If a specific tool for the assessment of a  
45  
46 teamwork process or outcome measure was used this is indicated in the corresponding column.  
47  
48 Observational studies were most prevalent. Teamwork processes were assessed using either  
49  
50 behaviourally anchored rating scales ( $N=8$ ) or structured observation ( $N=19$ ) of specific  
51  
52 teamwork behaviour. Structured observation—as we describe it—is defined as a purely  
53  
54  
55  
56  
57  
58  
59  
60

1  
2  
3 descriptive assessment of certain behaviour usually using a predefined observation system (e.g.  
4 amount of speaking up behaviour). In contrast, behaviourally anchored rating scales consist of an  
5 evaluation of teamwork process behaviour by an expert. Only three studies used surveys to  
6 assess teamwork behaviours. The majority of the studies ( $N=27$ ) assessed process performance  
7 using either a checklist-based expert rating or assessing a reaction time measure after the  
8 occurrence of a certain event (e.g. time until intervention). Only four studies assessed outcome  
9 performance measures (e.g. morbidity, mortality). Table 2 provides an overview of all variables  
10 included in the meta-analysis including the effect sizes and moderator variables.  
11  
12  
13  
14  
15  
16  
17  
18  
19  
20  
21  
22  
23

#### 24 **Effect of teamwork and contextual factors**

25  
26 Table 3 shows the relationship between teamwork and team performance. The sample-  
27 sized weighted mean correlation was .28 (95% CI: .20 – .35,  $z = 6.55$ ,  $p < .001$ ), indicating that  
28 teamwork is positively related to clinical performance. Results further indicated heterogeneous  
29 effect size distributions across the included samples ( $Q = 53.73$ ,  $p < .05$ ,  $I^2 = 45.96$ ), signifying  
30 that the variability across the sample effect sizes was more than what would be expected from  
31 sampling error alone.  
32  
33  
34  
35  
36  
37  
38  
39

40 To test for moderator effects of the contextual factors, we conducted mixed-effects  
41 models including the mentioned moderators: *professional composition*, *team familiarity*, *team*  
42 *size*, *task type*, *patient realism* and *performance measures*.  
43  
44  
45  
46

47 The omnibus test of moderators was not significant ( $F = 0.18$ ,  $df_1 = 6$ ,  $df_2 = 18$ ,  $p > .20$ ),  
48 suggesting that the examined contextual factors did not influence the average effect of teamwork  
49 on clinical performance. To provide greater detail about the role of the contextual factors, we  
50 conducted separate analyses for the categorical contextual factors and report them in Table 3.  
51  
52  
53  
54  
55  
56  
57  
58  
59  
60

Table 3. Meta-Analytic relationships between teamwork and clinical performance

|                                 | N     | k  | r   | 95% CI       | 80% CR       | Q     | I <sup>2</sup> |
|---------------------------------|-------|----|-----|--------------|--------------|-------|----------------|
| Overall relationship            | 1,390 | 31 | .28 | [.20 ; .35]  | [.09 ; .45]  | 53.7  | 46.0           |
| <i>Team characteristics</i>     |       |    |     |              |              |       |                |
| <i>Professional composition</i> |       |    |     |              |              |       |                |
| Interprofessional               | 1,264 | 27 | .28 | [.20 ; .36]  | [.09 ; .46]  | 47.1* | 48.2           |
| Uniprofessional                 | 126   | 4  | .28 | [-.01 ; .52] | [-.04 ; .54] | 6.5   | 47.1           |
| <i>Team familiarity</i>         |       |    |     |              |              |       |                |
| Experimental team               | 240   | 10 | .25 | [.05 ; .43]  | [-.05 ; .51] | 17.2* | 47.2           |
| Real team                       | 1,150 | 21 | .29 | [.20 ; .37]  | [.12 ; .45]  | 36.2* | 45.7           |
| Team size <sup>a</sup>          |       |    |     |              |              |       |                |
| <i>Task characteristics</i>     |       |    |     |              |              |       |                |
| <i>Task type</i>                |       |    |     |              |              |       |                |
| Routine task                    | 766   | 14 | .27 | [.12 ; .40]  | [-.01 ; .50] | 30.9* | 65.0           |
| Non-routine task                | 609   | 16 | .29 | [.20 ; .39]  | [.16 ; .42]  | 20.5  | 24.6           |
| <i>Methodological factors</i>   |       |    |     |              |              |       |                |
| <i>Patient realism</i>          |       |    |     |              |              |       |                |
| Real patient                    | 993   | 16 | .28 | [.18 ; .38]  | [.10 ; .45]  | 28.7* | 49.3           |
| Simulated patient               | 397   | 15 | .28 | [.13 ; .41]  | [.02 ; .50]  | 25.0* | 44.6           |
| <i>Performance measures</i>     |       |    |     |              |              |       |                |
| Outcome performance             | 390   | 4  | .13 | [.03 ; .23]  | [.06 ; .19]  | 1.3   | 0.0            |
| Process performance             | 1,000 | 27 | .30 | [.21 ; .39]  | [.10 ; .49]  | 45.6* | 45.6           |

Note. *k* = number of studies; *N* = cumulative sample size (number of teams); *r* = sample-size weighted correlation; CI = confidence interval; CR = credibility interval; *Q* = test statistic for residual heterogeneity of the models; *I*<sup>2</sup> = % of total variability in the effect size estimates due to heterogeneity among true effects (vs. sampling error)

<sup>a</sup> Team size was entered as a continuous variable, therefore, no subgroup analyses exist



## DISCUSSION

With this study, we quantified the relationship between teamwork and performance in healthcare teams. By including various contextual factors, we investigated potential contingencies that these factors might have on this relationship. The analysis of 1390 teams from 31 different studies showed that teamwork has a medium sized effect ( $r=.28$ ;[55]) on clinical performance across various care settings. Our study is the first to investigate this relationship quantitatively with a meta-analytical procedure. We provide strong evidence that teamwork contributes considerably towards quality of care—or in other words, poor teamwork significantly increases the risk for unsafe care and even patient harm. This finding aligns with and advances previous work that explored this relationship in a qualitative way.[9,16,18,39-43]

The analysis of moderators illustrates that teamwork is related with performance under a variety of conditions. Regardless of team characteristics (professional composition, familiarity, team size) or task type (routine vs. non-routine task), teamwork influences clinical performance. Clinicians and educators from all fields should strive to maintain or increase effective teamwork. Our results suggest that teams in different contexts characterised by different team constellations, team size and levels of acuity of care all benefit from teamwork.

A closer look at methodological factors of the included studies revealed that the observed relationship between teamwork and performance in simulation settings does not differ from relationships observed in real settings. Therefore, we conclude that teamwork studies conducted in simulation settings generalize to real life settings. Further, the analysis of different performance measures reveals a trend towards process performance measures being more strongly related with teamwork than outcome performance measures. A possible explanation of this finding relates to the difficulty of investigating outcome performance measures in a manner

1  
2  
3 isolated from other variables. Nevertheless, we still found a significant relationship between  
4  
5 teamwork and objective patient outcomes (e.g. postoperative complications, bloodstream  
6  
7 infections) despite the methodological challenges of measuring outcome performance and the  
8  
9 small number of studies using outcome performance ( $k = 4$ ).  
10

11  
12 Our results are in line with previous meta-analyses investigating the effectiveness of team  
13  
14 training in healthcare.[19,20] Similar to our results, Hughes et al. highlighted the effectiveness of  
15  
16 team trainings under a variety of conditions—irrespective of team composition,[19] simulator  
17  
18 fidelity or patient acuity of the trainee’s unit as well as other factors.  
19

20  
21 We were unable to find a moderation of task type in our study, potentially explained by task  
22  
23 interdependence, which reflects the degree to which team members depend on one another for  
24  
25 their effort, information, and resources.[56] A meta-analysis including teams from multiple  
26  
27 industries (e.g. project teams, management teams) found that task interdependence moderates the  
28  
29 relationship between teamwork and performance, demonstrating the importance of teamwork for  
30  
31 highly interdependent team tasks.[57] Most studies included in our analysis focused on rather  
32  
33 short and intense patient care episodes (e.g. a surgery, a resuscitation task) with high task  
34  
35 interdependence, which may explain the high relevance of teamwork for all these teams.  
36  
37  
38  
39  
40  
41

## 42 **Limitations and future directions**

43  
44 Despite greater attention to healthcare team research and team training over the last decade,  
45  
46 we were only able to identify 32 studies (31 included in meta-analysis). Of note, over two-thirds  
47  
48 of the studies in our analysis emerged in the last 10 years, reflecting the increasing interest in the  
49  
50 topic. The rather small number of studies might relate to the difficulties in quantifying teamwork,  
51  
52 the considerable theoretical and methodological knowledge required, and the challenges of  
53  
54  
55  
56  
57  
58  
59  
60

1  
2  
3 capturing relevant outcome measures. Future research should build on recent theoretical and  
4 applied work[23,24,26,58] about teamwork and use this current meta-analysis as a signpost for  
5 future investigations. In order to move our field forward, we must use existing conceptual  
6 frameworks[21,23,24] and establish standards for investigating teams and teamwork. This can  
7 often only be achieved with interdisciplinary research teams including experts from the medical  
8 fields but equally important from health professions education, psychology or communication  
9 studies.

10  
11  
12 Another limitation relates to the unbalanced analysis of subgroups. For example, we only  
13 identified four studies that used outcome performance variables compared to 27 using process  
14 performance measures. Uneven groups may reduce the power to detect significant differences.  
15 Therefore, we encourage future studies to include outcome performance measures despite the  
16 effort required.

17  
18  
19 Moreover, we cannot rule out a file-drawer effect, meaning that we probably could not find  
20 and include all unpublished studies, a common downside of meta-analysis.[37] Unpublished  
21 studies more often report nonsignificant results.

22  
23  
24 Finally, more factors may influence the relationship between teamwork and performance that  
25 we were unable to extract from the studies. While we tested for the effects of team familiarity by  
26 comparing experimental teams and real teams, this does not fully capture team member  
27 familiarity. The extent to which team members actually worked together during prior clinical  
28 practice might predict of how effectively they perform together. However, even two people  
29 working in the same ward might actually not have interacted much during patient care depending  
30 on the setting. Further, also team climate on a ward or in a hospital may be an important  
31 predictor of how well teams work together, especially related to sharing information or speaking

1  
2  
3 up within the team.[59,60] Unfortunately we were not able to extract this information from the  
4  
5 primary studies. Therefore, future work needs to consider and also document a broader range of  
6  
7 potentially influencing factors.  
8  
9

## 12 **Conclusion**

14 The current meta-analysis confirms that teamwork across various team compositions  
15  
16 represents a powerful process to improve patient care. Good teamwork can be achieved by joint  
17  
18 reflection about teamwork during clinical event debriefings[61,62] as well as team trainings[63]  
19  
20 and system improvement. All healthcare organisations should recognise these findings and place  
21  
22 continuous efforts into maintaining and improving teamwork for the benefit of their patients.  
23  
24  
25  
26  
27  
28  
29  
30  
31  
32  
33  
34  
35  
36  
37  
38  
39  
40  
41  
42  
43  
44  
45  
46  
47  
48  
49  
50  
51  
52  
53  
54  
55  
56  
57  
58  
59  
60

1  
2  
3 **Funding statement:** This work was funded by the European Society of Anaesthesiology (ESA)  
4 and the Swiss National Science Foundation (SNSF, Grant No. P300P1\_177695). The ESA  
5 provided resources for an additional research assistant helping with literature search and  
6 selection. Part of the salary of JS was funded by the SNSF.  
7  
8  
9

10  
11  
12 **Competing interests:** All authors have completed the Unified Competing Interest form  
13 (available on request from the corresponding author) and declare no support from any  
14 organisation for the submitted work; no financial relationships with any organisations that might  
15 have an interest in the submitted work; no other relationships or activities that could appear to  
16 have influenced the submitted work.  
17  
18  
19

20  
21  
22 **Author contributions:** All authors substantially contributed to this study and were involved in  
23 the study design. JS drafted the paper. LM analysed the data and revised the manuscript for  
24 content. TM revised the manuscript for content and language. All authors approved the final  
25 version.  
26  
27  
28

29  
30  
31  
32 **Ethics approval:** Not required  
33

34  
35 **Acknowledgements:** The authors thank Manuel Stühlinger for his help with study selection and  
36 data extraction and Walter J. Eppich, MD, MEd for a critical review and proof reading the  
37 manuscript.  
38  
39  
40

41  
42 **Data sharing:** Dataset is available from the corresponding author.  
43  
44  
45  
46  
47  
48  
49  
50  
51  
52  
53  
54  
55  
56  
57  
58  
59  
60

1  
2  
3 **REFERENCE**  
4

- 5 1 Thomas EJ. Improving teamwork in healthcare: current approaches and the path  
6 forward. *BMJ Qual Saf* 2011;20:647–50.  
7  
8  
9
- 10 2 Salas E, Rosen MA. Building high reliability teams: progress and some reflections  
11 on teamwork training. *BMJ Qual Saf* 2013;22:369–73.  
12  
13  
14
- 15 3 Schraagen JM, Schouten T, Smit M, et al. Assessing and improving teamwork in  
16 cardiac surgery. *Qual Saf Health Care* 2010;19:e29–9.  
17  
18
- 19 4 Williams AL, Lasky RE, Dannemiller JL, et al. Teamwork behaviours and errors  
20 during neonatal resuscitation. *BMJ Qual Saf* 2010;19:60–4.  
21  
22  
23
- 24 5 Guerlain S, Turrentine FE, Bauer DT, et al. Crew resource management training for  
25 surgeons: Feasibility and impact. *Cogn Technol Work* 2008;10:255–64.  
26  
27  
28
- 29 6 McCulloch P, Mishra A, Handa A, et al. The effects of aviation-style non-technical  
30 skills training on technical performance and outcome in the operating theatre. *Qual*  
31 *Saf Health Care* 2009;18:109–15.  
32  
33  
34
- 35 7 Yule S, Flin R, Maran N, et al. Debriefing surgeons on non-technical skills  
36 (NOTSS). *Cogn Tech Work* 2007;139:131–274.  
37  
38  
39
- 40 8 Burke CS, Salas E, Wilson-Donnelly K, et al. How to turn a team of experts into an  
41 expert medical team: guidance from the aviation and military communities. *Qual Saf*  
42 *Health Care* 2004;13:i96–104.  
43  
44  
45
- 46 9 Schmutz J, Manser T. Do team processes really have an effect on clinical  
47 performance? A systematic literature review. *Br J Anaesth* 2013;110:529–44.  
48  
49  
50
- 51 10 Carlson J, Min E, Bridges D. The impact of leadership and team behavior on  
52 standard of care delivered during human patient simulation: A pilot study for  
53  
54  
55  
56  
57  
58  
59  
60

- 1  
2  
3 undergraduate medical students. *Teach Learn Med* 2009;21:24–32.  
4
- 5  
6 11 Mishra A, Catchpole K, McCulloch P. The Oxford NOTECHS System: Reliability  
7  
8 and validity of a tool for measuring teamwork behaviour in the operating theatre.  
9  
10 *Qual Saf Health Care* 2009;18:104–8.  
11
- 12  
13 12 Manojlovich M, DeCicco B. Healthy Work Environments, Nurse-Physician  
14  
15 Communication, and Patients Outcomes. *Am J Crit Care* 2007;16:536–43.  
16
- 17  
18 13 Schmutz J, Hoffmann F, Heimberg E, et al. Effective coordination in medical  
19  
20 emergency teams: The moderating role of task type. *Europ J Work Org Psych*  
21  
22 2015;24:761–76.  
23
- 24  
25 14 Tschan F, Semmer NK, Nägele C, et al. Task adaptive behavior and performance in  
26  
27 groups. *Group Processes Intergroup Relat* 2000;3:367–86.  
28
- 29  
30 15 Manser T. Teamwork and patient safety in dynamic domains of healthcare: a review  
31  
32 of the literature. *Acta Anaesthesiol Scand* 2009;53:143–51.  
33
- 34  
35 16 Fernandez Castelao E, Russo SG, Riethmüller M, et al. Effects of team coordination  
36  
37 during cardiopulmonary resuscitation: A systematic review of the literature. *J Crit*  
38  
39 *Care* 2013;28:504–21.  
40
- 41  
42 17 Dietz AS, Pronovost PJ, Benson KN, et al. A systematic review of behavioural  
43  
44 marker systems in healthcare: what do we know about their attributes, validity and  
45  
46 application? *BMJ Qual Saf* 2014;23:1031–9.  
47
- 48  
49 18 Flowerdew L, Brown R, Vincent C. Identifying nontechnical skills associated with  
50  
51 safety in the emergency department: a scoping review of the literature. *Ann Emerg*  
52  
53 *Med* 2012;59:386–94.  
54
- 55  
56 19 Hughes AM, Gregory ME, Joseph DL, et al. Saving Lives: A Meta-Analysis of  
57  
58  
59

- 1  
2  
3 Team Training in Healthcare. *J Appl Psychol* 2016;1266-04.  
4  
5  
6 20 O'Dea A, O'Connor P, Keogh I. A meta-analysis of the effectiveness of crew  
7  
8 resource management training in acute care domains. *Postgrad Med J* 2014;90:699–  
9  
10 708.  
11  
12 21 Fernandez R, Kozlowski SW, Shapiro MJ, et al. Toward a definition of teamwork in  
13  
14 emergency medicine. *Acad Emerg Med* 2008;15:1104–12.  
15  
16  
17 22 Bowers CA, Braun CC, Morgan BB. Team workload: Its meaning and  
18  
19 measurement. In: Brannik MT, Salas E, Prince C, eds. Team Performance  
20  
21 Assessment and Measurement: Theory, methods, and applications. New York, NY:  
22  
23 Lawrence Erlbaum Associates 1997:85–108.  
24  
25  
26 23 Marks MA, Mathieu JE, Zaccaro SJ. A temporally based framework and taxonomy  
27  
28 of team processes. *Acad Manag Rev* 2001;26:356–76.  
29  
30  
31 24 Reader TW, Flin R, Mearns K. Developing a team performance framework for the  
32  
33 intensive care unit. *Crit Care Med* 2009;37:1787–93.  
34  
35  
36 25 Ilgen DR, Hollenbeck JR, Johnson M, et al. Teams in organizations: From input-  
37  
38 process-output models to IMO models. *Annu Rev Psychol* 2005;56:517–43.  
39  
40  
41 26 Burke CS, Stagl KC, Salas E, et al. Understanding team adaptation: a conceptual  
42  
43 analysis and model. *J Appl Psychol* 2006;91:1189–207.  
44  
45  
46 27 Maloney MM, Bresman H, Zellmer-Bruhn ME. Contextualization and Context  
47  
48 Theorizing in Teams Research: A Look Back and a Path Forward. *Acad Manag Ann*  
49  
50 2016;10:891–942.  
51  
52 28 Kozlowski SW, Klein KJ. A multilevel approach to theory and research in  
53  
54 organizations: Contextual, temporal, and emergent processes. In Klein KJ,  
55  
56  
57  
58  
59  
60



- 1  
2  
3 Kozlowski SWJ, eds. Multilevel theory, research, and methods in organizations:  
4 Foundations, extensions, and new directions. San Francisco, CA: Jossey-Bass.  
5  
6 2000:3-90.  
7  
8  
9  
10 29 Schofield RF, Amodeo M. Interdisciplinary teams in health care and human services  
11 settings: are they effective? *Health Soc W* 1999;24:210–9.  
12  
13  
14 30 Hall P. Interprofessional teamwork: Professional cultures as barriers. *J Interprof*  
15 *Care* 2005;19:188–96.  
16  
17  
18 31 Lillrank P. The quality of standard, routine and nonroutine processes. *Org Studies*  
19 2003;24:215–33.  
20  
21  
22 32 Eppich WJ, Oconnor LO, Adler M. Providing effective simulation activities. In:  
23 Forrest K, McKimm J, Edgar S, eds. Essential Simulation in Clinical Education,  
24 Oxford, UK: John Wiley & Sons, Ltd; 2013:213–34.  
25  
26  
27 33 Anderson N, Ones DS, Sinangil HK, et al. Handbook of industrial, work and  
28 organizational psychology. London: Sage Publications Ltd; 2001.  
29  
30  
31 34 Sonnentag S, Frese M. Performance concepts and performance theory. *Psych Manag*  
32 *Ind Perf* 2002;23:3–25.  
33  
34  
35 35 Cooper S, Cade J. Predicting survival, in-hospital cardiac arrests: resuscitation  
36 survival variables and training effectiveness. *Resuscitation* 1997;35:17–22.  
37  
38  
39 36 Liberati A, Altman DG, Tetzlaff J, et al. The PRISMA Statement for Reporting  
40 Systematic Reviews and Meta-Analyses of Studies That Evaluate Health Care  
41 Interventions: Explanation and Elaboration. *PLoS Med* 2009;6:e1000100.  
42  
43  
44 37 Hunter JE, Schmidt FL. Methods of meta-analysis: Correcting error and bias in  
45 research findings. Thousand Oaks, CA: Sage Publications; 2004.  
46  
47  
48  
49  
50  
51  
52  
53  
54  
55  
56  
57  
58  
59  
60

- 1  
2  
3 38 Card N. Applied Meta-Analysis for Social Science Research. New York: Guilford  
4 Publications; 2015.  
5  
6  
7  
8 39 Fletcher GCL, McGeorge P, Flin RH, et al. The role of non-technical skills in  
9 anaesthesia: a review of current literature. *Br J Anaesth* 2002;88:418–29.  
10  
11  
12 40 Ghaferi AA, Dimick JB. Importance of teamwork, communication and culture on  
13 failure-to-rescue in the elderly. *B J Surgery* 2016;103.  
14  
15  
16  
17 41 Mitchell L, Flin R. Non-technical skills of the operating theatre scrub nurse:  
18 literature review. *J Adv Nurs* 2008;63:15–24.  
19  
20  
21  
22 42 Santos R, Bakero L, Franco P, et al. Characterization of non-technical skills in  
23 paediatric cardiac surgery: communication patterns. *Eur J Cardiothorac Surg*  
24 2012;41:1005–12.  
25  
26  
27  
28  
29 43 Youngson GG. Nontechnical skills in pediatric surgery: Factors influencing  
30 operative performance. *J Ped Surgery* 2016;51:226–30.  
31  
32  
33  
34 44 Hunter JE, Schmidt FL. Methods of meta-analysis: Correcting error and bias in  
35 research findings. Thousand Oaks, CA: Sage Publications; 2004.  
36  
37  
38 45 Gully SM, Devine DJ, Whitney DJ. A meta-analysis of cohesion and performance  
39 effects of level of analysis and task interdependence. *Small Group Research*  
40 1995;26:497–520.  
41  
42  
43  
44  
45 46 Hunter JE, Schmidt FL. Dichotomization of continuous variables: The implications  
46 for meta-analysis. *J Appl Psychol* 1990;75:334.  
47  
48  
49  
50 47 Campbell JP. Modeling the performance prediction problem in industrial and  
51 organizational psychology. In: Dunnette MD, Hough LM, eds. Handbook of  
52 industrial and organizational psychology, Palo Alto, CA: Consulting Psychologists  
53  
54  
55  
56  
57  
58  
59  
60

- 1  
2  
3 Press; 1990:687–732.  
4  
5  
6 48 Schmutz J, Eppich WJ, Hoffmann F, et al. Five steps to develop checklists for  
7  
8 evaluating clinical performance: An integrative approach. *Acad Med* 2014;89:996–  
9  
10 1005.  
11  
12 49 Borenstein M, Hedges LV, Higgins JPT, et al. Introduction to Meta-Analysis.  
13  
14 Hoboken, NJ: John Wiley & Sons, Ltd; 2009.  
15  
16  
17 50 Walker DA. JMASM9: converting Kendall's tau for correlational or meta-analytic  
18  
19 analyses. *J Mod Appl Stat Meth* 2003;2:525–30.  
20  
21  
22 51 Lipsey MW, Wilson D. Practical meta-analysis. New York: Sage Publications, Inc;  
23  
24 2001.  
25  
26 52 Viechtbauer W. Conducting meta-analyses in R with the metafor package. *J Stat*  
27  
28 *Softw* 2010;36:1–48.  
29  
30  
31 53 Viechtbauer W. Bias and efficiency of meta-analytic variance estimators in the  
32  
33 random-effects model. *J Edu Behav Stat* 2005;30:261–93.  
34  
35  
36 54 Viechtbauer W, Cheung MWL. Outlier and influence diagnostics for meta-analysis.  
37  
38 *Res Synth Methods* 2010;1:112–25.  
39  
40  
41 55 Cohen J. Statistical power analysis for the behavioral sciences. Hillsdale, NJ:  
42  
43 Lawrence Erlbaum; 1988.  
44  
45 56 Wageman R, Baker G. Incentives and cooperation: The joint effects of task and  
46  
47 reward interdependence on group performance. *J Organiz Behav* 1997:139–58.  
48  
49  
50 57 LePine JA, Piccolo RF, Jackson CL, et al. A meta-analysis of teamwork processes:  
51  
52 tests of a multidimensional model and relationships with team effectiveness criteria.  
53  
54 *Pers Psychol* 2008;61:273–307.  
55  
56  
57  
58  
59  
60

- 1  
2  
3 58 Maynard MT, Kennedy DM, Sommer SA. Team adaptation: A fifteen-year  
4 synthesis (1998–2013) and framework for how this literature needs to “adapt” going  
5 forward. *Europ J Work Org* 2015;24:1–26.  
6  
7  
8  
9  
10 59 Edmondson AC. Teaming: How organizations learn, innovate, and compete in the  
11 knowledge economy. San Francisco, CA: Jossey-Bass; 2012.  
12  
13  
14 60 Edmondson AC, Lei Z. Psychological safety: The history, renaissance, and future of  
15 an interpersonal construct. *Annu Rev Organ Psychol Organ Behav* 2014;1:23–43.  
16  
17  
18  
19 61 Eppich WJ, Mullan PC, Brett-Fleegler M, et al. “Let's Talk About It”: Translating  
20 Lessons From Health Care Simulation to Clinical Event Debriefings and Coaching  
21 Conversations. *Clin Pediatr Emerg Med* 2016;17:200–11.  
22  
23  
24  
25  
26 62 Schmutz JB, Eppich WJ. Promoting learning and patient care through shared  
27 reflection: A conceptual framework for team reflexivity in healthcare. *Acad Med*  
28 2017;92:1555–63.  
29  
30  
31  
32  
33 63 Salas E, Diaz Granados D, Weaver SJ, et al. Does Team Training Work? Principles  
34 for Health Care. *Acad Emerg Med* 2008;15:1002–9.  
35  
36  
37  
38 64 Amacher SA, Schumacher C, Legeret C, et al. Influence of Gender on the  
39 Performance of Cardiopulmonary Rescue Teams: A Randomized, Prospective  
40 Simulator Study. *Crit Care Med* 2017.  
41  
42  
43  
44  
45 65 Brogaard L, Kierkegaard O, Hvidmand L, et al. Is non-technical performance the  
46 key to high clinical performance in obstetric teams? Paper presented at the *Annual*  
47 *conference of the British Maternal Fetal Medicine Society*, 2018.  
48  
49  
50  
51 66 Burtscher MJ, Kolbe M, Wacker J, et al. Interactions of team mental models and  
52 monitoring behaviors predict team performance in simulated anesthesia inductions. *J*  
53  
54  
55  
56  
57  
58  
59  
60

- 1  
2  
3 *Exp Psychol Appl* 2011;17:257–69.
- 4  
5 67 Burtscher MJ, Manser T, Kolbe M, et al. Adaptation in anaesthesia team  
6  
7 coordination in response to a simulated critical event and its relationship to clinical  
8  
9 performance. *Br J Anaesth* 2011;106:801–6.
- 10  
11  
12 68 Burtscher MJ, Wacker J, Grote G, et al. Managing nonroutine events in anesthesia:  
13  
14 the role of adaptive coordination. *Hum Factors* 2010;52:282–94.
- 15  
16  
17 69 Catchpole KR, Giddings AE, Wilkinson M, et al. Improving patient safety by  
18  
19 identifying latent failures in successful operations. *Surgery* 2007;142:102–10.
- 20  
21  
22 70 Catchpole K, Mishra A, Handa A, et al. Teamwork and Error in the Operating  
23  
24 Room. *Ann Surg* 2008;247:699–706.
- 25  
26  
27 71 Cooper S, Wakelam A. Leadership of resuscitation teams: “Lighthouse Leadership.”  
28  
29 *Resuscitation* 1999;42:27–45.
- 30  
31  
32 72 Davenport DL, Henderson WG, Mosca CL, et al. Risk-adjusted morbidity in  
33  
34 teaching hospitals correlates with reported levels of communication and  
35  
36 collaboration on surgical teams but not with scale measures of teamwork climate,  
37  
38 safety climate, or working conditions. *J Am Coll Surg* 2007;205:778–84.
- 39  
40  
41 73 El Bardissi AW, Wiegmann DA, Henrickson S, et al. Identifying methods to  
42  
43 improve heart surgery: an operative approach and strategy for implementation on an  
44  
45 organizational level. *Eur J Cardiothorac Surg* 2008;34:1027–33.
- 46  
47  
48 74 Gillespie BM, Chaboyer W, Fairweather N. Factors that influence the expected  
49  
50 length of operation: results of a prospective study. *BMJ Qual Saf* 2012;21:3–12.
- 51  
52  
53 75 Kolbe M, Burtscher MJ, Wacker J, et al. Speaking Up Is Related to Better Team  
54  
55 Performance in Simulated Anesthesia Inductions: An Observational Study. *Anesth*

- 1  
2  
3 *Analg* 2012.  
4  
5  
6 76 Künzle B, Zala-Mezo E, Wacker J. Leadership in anaesthesia teams: the most  
7  
8 effective leadership is shared. *Qual Saf Health Care* 2010;19:1–6.  
9  
10 77 Manojlovich M, DeCicco B. Healthy Work Environments, Nurse-Physician  
11  
12 Communication, and Patients Outcomes. *Am J Crit Care* 2007;16:536–43.  
13  
14 78 Manser T, Bogdanovic J, Arora S, et al. Effective Team Management as a Critical  
15  
16 Coordination Skill of Surgical Leaders. Paper presented at the *9th International*  
17  
18 *Meeting for Behavioural Science in Surgery & Acute Care Settings*, 2015.  
19  
20 79 Marsch SCU, Müller C, Marquardt K, et al. Human factors affect the quality of  
21  
22 cardiopulmonary resuscitation in simulated cardiac arrests. *Resuscitation*  
23  
24 2004;60:51–6.  
25  
26  
27  
28 80 Mazzocco K, Petitti DB, Fong KT, et al. Surgical team behaviors and patient  
29  
30 outcomes. *Am J Surg* 2009;197:678–85.  
31  
32  
33 81 Mishra A, Catchpole K, Dale T, et al. The influence of non-technical performance  
34  
35 on technical outcome in laparoscopic cholecystectomy. *Surg Endosc* 2007;22:68–73.  
36  
37  
38 82 Schmutz J, Hoffmann F, Heimberg E, et al. Effective coordination in medical  
39  
40 emergency teams: The moderating role of task type. *Europ J Work Org Psych*  
41  
42 2015;24:761–76.  
43  
44  
45 83 Siassakos D, Bristowe K, Draycott TJ, et al. Clinical Efficiency in a Simulated  
46  
47 Emergency and Relationship to Team Behaviors: A Multisite Cross-sectional Study.  
48  
49 *Obstet Anesth Digest* 2012;32:41.  
50  
51 84 Siassakos D, Fox R, Crofts JF, et al. The management of a simulated emergency:  
52  
53 Better teamwork, better performance. *Resuscitation*  
54  
55  
56  
57  
58  
59  
60

- 1  
2  
3 85 Thomas EJ, Sexton JB, Lasky RE, et al. Teamwork and quality during neonatal care  
4 in the delivery room. *J Perinatol* 2006;26:163–9.  
5  
6  
7  
8 86 Tschan F, Semmer NK, Gautschi, et al. Leading to Recovery: Group Performance  
9 and Coordinative Activities in Medical Emergency Driven Groups. *Hum Perf*  
10 2006;19:277–304.  
11  
12  
13  
14 87 Tschan F, Semmer NK, Gurtner A, et al. Explicit reasoning, confirmation bias, and  
15 illusory transactive memory: A simulation study of group medical decision making.  
16 *Small Group Res* 2009;40:271–300.  
17  
18  
19  
20  
21 88 Westli H, Johnsen B, Eid J, et al. Teamwork skills, shared mental models, and  
22 performance in simulated trauma teams: an independent group design. *Scand J*  
23 *Trauma Resusc Emerg Med* 2010;18:47.  
24  
25  
26  
27  
28 89 Wiegmann DA, ElBardissi AW, Dearani JA. Disruptions in surgical flow and their  
29 relationship to surgical errors: an exploratory investigation. *Surgery* 2007;142:658–  
30 65.  
31  
32  
33  
34  
35 90 Williams AL, Lasky RE, Dannemiller JL, et al. Teamwork behaviours and errors  
36 during neonatal resuscitation. *Qual Saf Health Care* 2010;19:60–4.  
37  
38  
39  
40 91 Wright MC, Phillips-Bute BG, Petrusa ER et al. Assessing teamwork in medical  
41 education and practice: relating behavioural teamwork ratings and clinical  
42 performance. *Med Teach* 2009;31:30–8.  
43  
44  
45  
46 92 Yamada NK, Fuerch JH, Halamek LP. Impact of standardized communication  
47 techniques on errors during simulated neonatal resuscitation. *AM J Perinatol*  
48 2016;33:385–92.  
49  
50  
51  
52  
53  
54  
55  
56  
57  
58  
59

Figure 1. Systematic literature search.

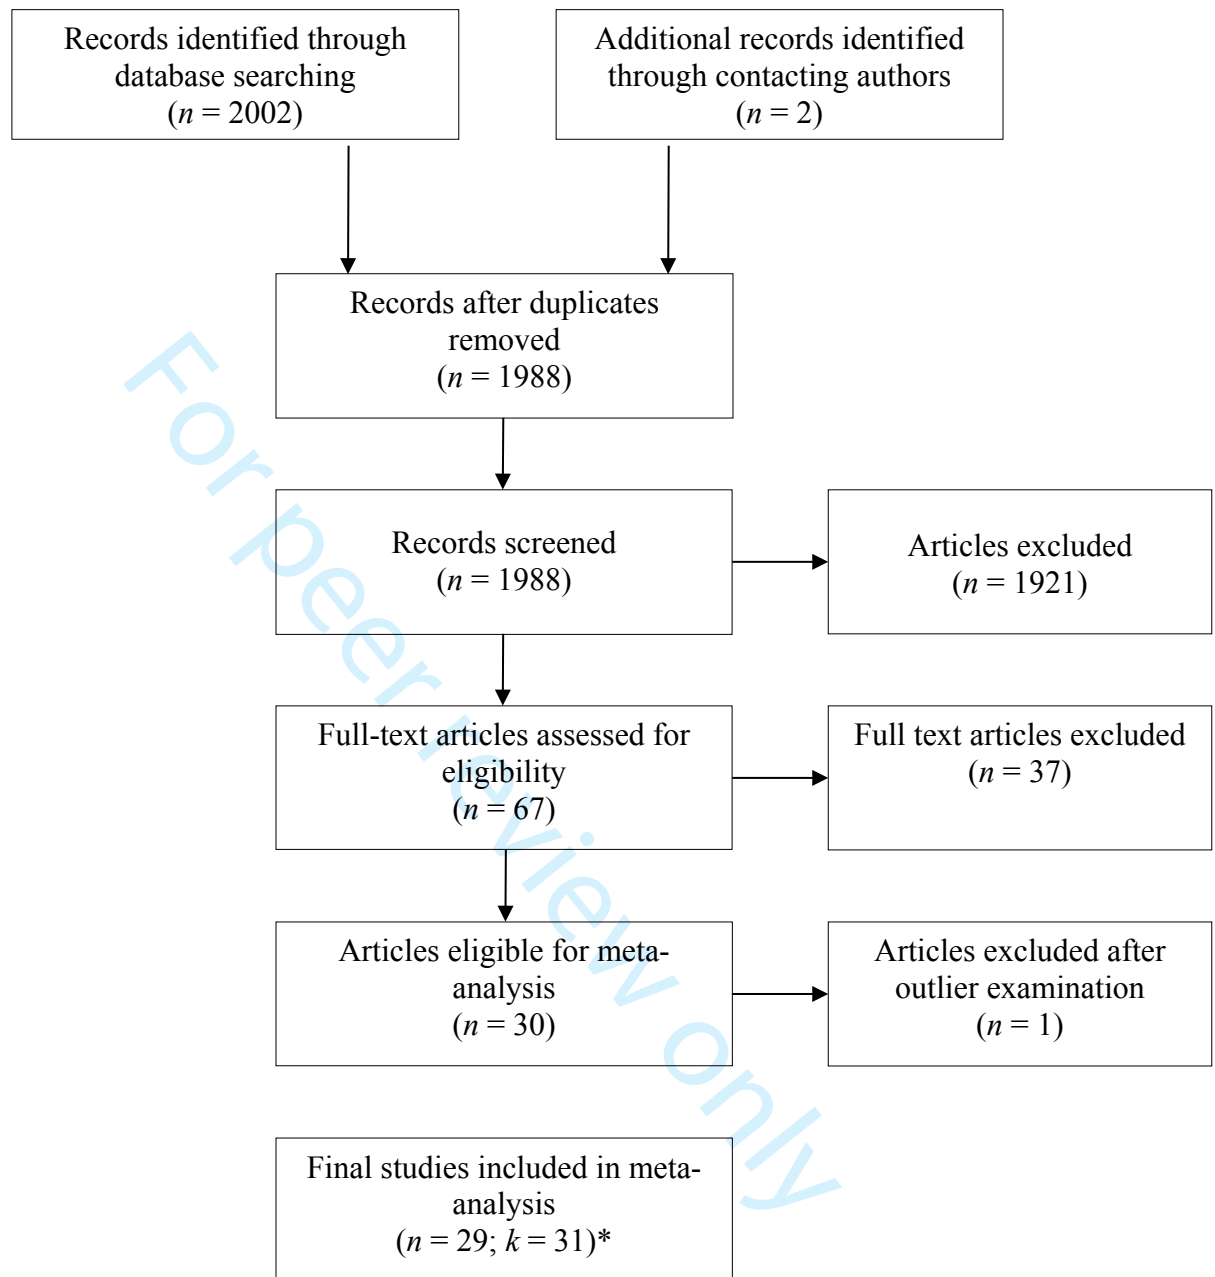

\*The search identified 31 studies published in 29 articles



**SUPPLEMENTARY FILE**

Article: **How effective is teamwork really? The relationship between teamwork and performance in healthcare teams: A systematic review and meta-analysis**

Jan B. Schmutz, PhD· Laurenz L. Meier, PhD· Tanja Manser, PhD

**Search terms used for PubMed search**

(Teamwork[All Fields]) OR (team[All Fields] AND coordination[All Fields]) OR (team[All Fields] AND "decision making"[All Fields]) OR ((team[All Fields]) AND (communication[MeSH Terms]) OR (communication[All Fields])) OR (team[All Fields] AND leadership[All Fields]) AND (patient safety[MeSH Terms])

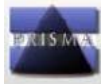

# PRISMA 2009 Checklist

1  
2  
3  
4  
5  
6  
7  
8  
9  
10  
11  
12  
13  
14  
15  
16  
17  
18  
19  
20  
21  
22  
23  
24  
25  
26  
27  
28  
29  
30  
31  
32  
33  
34  
35  
36  
37  
38  
39  
40  
41  
42  
43  
44  
45  
46  
47

| Section/topic                      | #  | Checklist item                                                                                                                                                                                                                                                                                              | Reported on page #          |
|------------------------------------|----|-------------------------------------------------------------------------------------------------------------------------------------------------------------------------------------------------------------------------------------------------------------------------------------------------------------|-----------------------------|
| <b>TITLE</b>                       |    |                                                                                                                                                                                                                                                                                                             |                             |
| Title                              | 1  | Identify the report as a systematic review, meta-analysis, or both.                                                                                                                                                                                                                                         | 1                           |
| <b>ABSTRACT</b>                    |    |                                                                                                                                                                                                                                                                                                             |                             |
| Structured summary                 | 2  | Provide a structured summary including, as applicable: background; objectives; data sources; study eligibility criteria, participants, and interventions; study appraisal and synthesis methods; results; limitations; conclusions and implications of key findings; systematic review registration number. | 2                           |
| <b>INTRODUCTION</b>                |    |                                                                                                                                                                                                                                                                                                             |                             |
| Rationale                          | 3  | Describe the rationale for the review in the context of what is already known.                                                                                                                                                                                                                              | 4-8                         |
| Objectives                         | 4  | Provide an explicit statement of questions being addressed with reference to participants, interventions, comparisons, outcomes, and study design (PICOS).                                                                                                                                                  | 4-5                         |
| <b>METHODS</b>                     |    |                                                                                                                                                                                                                                                                                                             |                             |
| Protocol and registration          | 5  | Indicate if a review protocol exists, if and where it can be accessed (e.g., Web address), and, if available, provide registration information including registration number.                                                                                                                               | n/a                         |
| Eligibility criteria               | 6  | Specify study characteristics (e.g., PICOS, length of follow-up) and report characteristics (e.g., years considered, language, publication status) used as criteria for eligibility, giving rationale.                                                                                                      | 9-10                        |
| Information sources                | 7  | Describe all information sources (e.g., databases with dates of coverage, contact with study authors to identify additional studies) in the search and date last searched.                                                                                                                                  | 9                           |
| Search                             | 8  | Present full electronic search strategy for at least one database, including any limits used, such that it could be repeated.                                                                                                                                                                               | 9 and supplemental material |
| Study selection                    | 9  | State the process for selecting studies (i.e., screening, eligibility, included in systematic review, and, if applicable, included in the meta-analysis).                                                                                                                                                   | 9-10                        |
| Data collection process            | 10 | Describe method of data extraction from reports (e.g., piloted forms, independently, in duplicate) and any processes for obtaining and confirming data from investigators.                                                                                                                                  | 10                          |
| Data items                         | 11 | List and define all variables for which data were sought (e.g., PICOS, funding sources) and any assumptions and simplifications made.                                                                                                                                                                       | 9-12                        |
| Risk of bias in individual studies | 12 | Describe methods used for assessing risk of bias of individual studies (including specification of whether this was done at the study or outcome level), and how this information is to be used in any data synthesis.                                                                                      | 20                          |
| Summary measures                   | 13 | State the principal summary measures (e.g., risk ratio, difference in means).                                                                                                                                                                                                                               | 13-19 / 23                  |

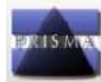

# PRISMA 2009 Checklist

|                      |    |                                                                                                                                                           |       |
|----------------------|----|-----------------------------------------------------------------------------------------------------------------------------------------------------------|-------|
| Synthesis of results | 14 | Describe the methods of handling data and combining results of studies, if done, including measures of consistency (e.g., $I^2$ ) for each meta-analysis. | 20-23 |
|----------------------|----|-----------------------------------------------------------------------------------------------------------------------------------------------------------|-------|

Page 1 of 2

| Section/topic                 | #  | Checklist item                                                                                                                                                                                           | Reported on page # |
|-------------------------------|----|----------------------------------------------------------------------------------------------------------------------------------------------------------------------------------------------------------|--------------------|
| Risk of bias across studies   | 15 | Specify any assessment of risk of bias that may affect the cumulative evidence (e.g., publication bias, selective reporting within studies).                                                             | 20,26              |
| Additional analyses           | 16 | Describe methods of additional analyses (e.g., sensitivity or subgroup analyses, meta-regression), if done, indicating which were pre-specified.                                                         | 22-23              |
| <b>RESULTS</b>                |    |                                                                                                                                                                                                          |                    |
| Study selection               | 17 | Give numbers of studies screened, assessed for eligibility, and included in the review, with reasons for exclusions at each stage, ideally with a flow diagram.                                          | 21                 |
| Study characteristics         | 18 | For each study, present characteristics for which data were extracted (e.g., study size, PICOS, follow-up period) and provide the citations.                                                             | 18-19              |
| Risk of bias within studies   | 19 | Present data on risk of bias of each study and, if available, any outcome level assessment (see item 12).                                                                                                | 18-19, 20          |
| Results of individual studies | 20 | For all outcomes considered (benefits or harms), present, for each study: (a) simple summary data for each intervention group (b) effect estimates and confidence intervals, ideally with a forest plot. | 13-19              |
| Synthesis of results          | 21 | Present results of each meta-analysis done, including confidence intervals and measures of consistency.                                                                                                  | 23                 |
| Risk of bias across studies   | 22 | Present results of any assessment of risk of bias across studies (see Item 15).                                                                                                                          | 23                 |
| Additional analysis           | 23 | Give results of additional analyses, if done (e.g., sensitivity or subgroup analyses, meta-regression [see Item 16]).                                                                                    | N/A                |
| <b>DISCUSSION</b>             |    |                                                                                                                                                                                                          |                    |
| Summary of evidence           | 24 | Summarize the main findings including the strength of evidence for each main outcome; consider their relevance to key groups (e.g., healthcare providers, users, and policy makers).                     | 24-27              |
| Limitations                   | 25 | Discuss limitations at study and outcome level (e.g., risk of bias), and at review-level (e.g., incomplete retrieval of identified research, reporting bias).                                            | 26-27              |
| Conclusions                   | 26 | Provide a general interpretation of the results in the context of other evidence, and implications for future research.                                                                                  | 27                 |
| <b>FUNDING</b>                |    |                                                                                                                                                                                                          |                    |
| Funding                       | 27 | Describe sources of funding for the systematic review and other support (e.g., supply of data); role of funders for the systematic review.                                                               | 28                 |

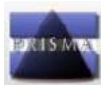

# PRISMA 2009 Checklist

From: Moher D, Liberati A, Tetzlaff J, Altman DG, The PRISMA Group (2009). Preferred Reporting Items for Systematic Reviews and Meta-Analyses: The PRISMA Statement. PLoS Med 6(6): e1000097. doi:10.1371/journal.pmed1000097

For more information, visit: [www.prisma-statement.org](http://www.prisma-statement.org).

Page 2 of 2

For peer review only

1  
2  
3  
4  
5  
6  
7  
8  
9  
10  
11  
12  
13  
14  
15  
16  
17  
18  
19  
20  
21  
22  
23  
24  
25  
26  
27  
28  
29  
30  
31  
32  
33  
34  
35  
36  
37  
38  
39  
40  
41  
42  
43  
44  
45  
46  
47

# BMJ Open

## How effective is teamwork really? The relationship between teamwork and performance in healthcare teams: A systematic review and meta-analysis

|                                 |                                                                                                                                                                                                                                                          |
|---------------------------------|----------------------------------------------------------------------------------------------------------------------------------------------------------------------------------------------------------------------------------------------------------|
| Journal:                        | <i>BMJ Open</i>                                                                                                                                                                                                                                          |
| Manuscript ID                   | bmjopen-2018-028280.R1                                                                                                                                                                                                                                   |
| Article Type:                   | Research                                                                                                                                                                                                                                                 |
| Date Submitted by the Author:   | 01-Apr-2019                                                                                                                                                                                                                                              |
| Complete List of Authors:       | Schmutz, Jan B.; Northwestern University, Department of Communication Studies<br>Meier, Laurenz ; University of Neuchâtel , Occupational Psychology and Organizations<br>Manser, Tanja; University of Applied Sciences and Arts Northwestern Switzerland |
| <b>Primary Subject Heading</b>: | Communication                                                                                                                                                                                                                                            |
| Secondary Subject Heading:      | Communication                                                                                                                                                                                                                                            |
| Keywords:                       | teamwork, non-technical skills, communication, meta-analysis, teams                                                                                                                                                                                      |
|                                 |                                                                                                                                                                                                                                                          |

SCHOLARONE™  
Manuscripts

# How effective is teamwork really? The relationship between teamwork and performance in healthcare teams: A systematic review and meta-analysis

**Jan B. Schmutz, PhD**

Researcher at the Department of Communication Studies, Northwestern University, Evanston, USA

Postdoctoral Researcher and Lecturer at the Department of Management, Technology, and Economics, ETH Zurich, Zurich, Switzerland

jan.schmutz@northwestern.edu

**Laurenz L. Meier, PhD**

Professor at the Institute of Work and Organizational Psychology, University of Neuchâtel, Neuchâtel, Switzerland

laurenz.meier@unine.ch

**Tanja Manser, PhD**

Director of the FHNW School of Applied Psychology, University of Applied Sciences and Arts Northwestern Switzerland, Olten, Switzerland

tanja.manser@fhnw.ch

Word count: 4647

Keywords: teamwork, non-technical skills, communication, teams, meta-analysis

## Correspondence to

Jan B. Schmutz  
ATLAS Lab  
Department of Communication Studies  
Northwestern University  
Frances Searle Building 1.220  
2240 Campus Drive  
Evanston, IL 60208  
United States  
Phone 847-491-7023  
jan.schmutz@northwestern.edu

## ABSTRACT

**Objectives** To investigate the relationship between teamwork and clinical performance and potential moderating variables of this relationship.

**Design** Systematic review and meta-analysis.

**Methods** Data sources were searched up to June 2018 and included PubMed, manual backward search of relevant reviews, manual backward and forward search of studies included in the meta-analysis and contacting of selected authors via e-mail. Studies were included if they reported a relationship between a teamwork process and a performance measure. Moderator variables (i.e. professional composition, team familiarity, average team size, task type, patient realism and type of performance measure) were coded and random-effect models were estimated. Two investigators independently extracted information on study characteristics in accordance with PRISMA guidelines.

**Results** The review identified 2002 articles of which 31 were included in the meta-analysis comprising 1390 teams. The sample-sized weighted mean correlation was  $r = .28$ , indicating that teamwork is positively related to performance. The test of moderators was not significant, suggesting that the examined factors did not influence the average effect of teamwork on performance.

**Conclusion** Teamwork has a medium-sized effect on performance. The analysis of moderators illustrated that teamwork relates to performance regardless of characteristics of the team or task. Therefore, healthcare organizations should recognize the value of teamwork and emphasize approaches that maintain and improve teamwork for the benefit of their patients.

## ARTICLE SUMMARY

### Strengths and limitations of this study

- This systematic review evaluates available studies investigating the effectiveness of teamwork processes.
- 31 studies have been included resulting in a substantial sample size of 1390 teams.
- The sample size of the primary studies included is usually low.
- For some subgroup analysis, the number of studies included was small.



## INTRODUCTION

1  
2  
3  
4  
5  
6  
7  
8  
9  
10  
11  
12  
13  
14  
15  
16  
17  
18  
19  
20  
21  
22  
23  
24  
25  
26  
27  
28  
29  
30  
31  
32  
33  
34  
35  
36  
37  
38  
39  
40  
41  
42  
43  
44  
45  
46  
47  
48  
49  
50  
51  
52  
53  
54  
55  
56  
57  
58  
59  
60

May it be an emergency team in the trauma room, paramedics treating patients after an accident or a surgical team in the operating room, teams are ubiquitous in healthcare and must work across professional, disciplinary and sectorial boundaries. Although the clinical expertise of individual team members is important to ensure high performance, teams must be capable of applying and combining the unique expertise of team members to maintain safety and optimal performance. In order for a team to be effective individual team members need to collaborate and engage in teamwork. Today, experts agree that effective teamwork anchors safe and effective care at various levels of the healthcare systems[1-4] leading to a relatively recent shift towards team research and training.[5-7]

Healthcare is an evidence-based field and therefore administrators and providers are seeking evidence in the literature concerning the impact of teamwork on performance outcomes like patient mortality, morbidity, infection rates or adherence to clinical treatment guidelines. Having a closer look at the literature investigating healthcare teams we find mixed and sometimes even contradicting results about the relationship between teamwork and clinical performance.[8] Some studies find a large effect of teamwork on performance outcomes (e.g. Carlson et al.[9]) while others report small or no relationships.[10,11] This inconsistency arises due to several reasons. First, the conceptual and empirical literature examining teamwork is fragmented and research examining teamwork effectiveness is spread across disciplines including medicine, psychology and organization science. Therefore, researchers and practitioners often lack a common conceptual foundation for investigating teams and teamwork in healthcare. Second, research studies on teamwork in healthcare usually exhibit small sample sizes because of the challenges of recruiting actual professional teams and carefully balancing research with patient

1  
2  
3 care priorities. Small sample sizes, however, increase the likelihood of reporting results that fail  
4  
5 to represent true effect. Third, studies investigating healthcare teams often ignore important  
6  
7 context variables of teams (e.g. team composition and size, task characteristics, team  
8  
9 environment) that likely influence the effect that teamwork has on clinical performance.[12,13]  
10  
11

12 These inconsistencies in the teamwork literature may lead to confusion about the importance  
13  
14 of teamwork in healthcare, thus giving voice to critics who hinder efforts to improve teamwork.  
15  
16 We aim to address these problems with a meta-analytical study investigating the performance  
17  
18 implications of teamwork. A meta-analytical approach moves beyond existing reviews on  
19  
20 teamwork in healthcare[8,14-17] and quantitatively tests if the widely advocated positive effect  
21  
22 of teamwork on performance holds true. In addition, this approach allows us to investigate  
23  
24 context variables as moderators that may influence the effect of teamwork on performance,  
25  
26 meaning that this effect might be stronger or weaker under certain conditions. Previous meta-  
27  
28 analyses[18,19] focused mainly on the effectiveness of team trainings but not on the effect of  
29  
30 teamwork itself. This meta-analysis will generate quantitative evidence to inform the relevance  
31  
32 of future interventions, regulations and policies targeting teamwork in healthcare organizations.  
33  
34  
35  
36

37 In the following we will first establish an operational definition of teamwork, elaborate on  
38  
39 relevant contextual factors, and present our respective meta-analytic results and their  
40  
41 interpretation.  
42  
43  
44  
45  
46

### 47 **Teams, teamwork and team performance**

48

49 In order to clearly understand the impact of teamwork on performance it is necessary to  
50  
51 provide a brief introduction to teams, teamwork and team performance. We define teams as  
52  
53 identifiable social work units consisting of two or more people with several unique  
54  
55  
56  
57  
58  
59  
60

1  
2  
3 characteristics. These characteristics include *a)* dynamic social interaction with meaningful  
4 interdependencies; *b)* shared and valued goals, *c)* a discrete lifespan, *e)* distributed expertise and  
5  
6 *f)* clearly assigned roles and responsibilities.[20,21] Based on this definition it becomes clear that  
7  
8 teams must dynamically share information and resources amongst members and coordinate their  
9  
10 activities in order to fulfil a certain task—in other words teams need to engage in *teamwork*.  
11  
12

13  
14 *Teamwork* as a term is widely used and often difficult to grasp. However, we absolutely  
15  
16 require a clear definition of teamwork especially for team trainings that target specific  
17  
18 behaviours. *Teamwork* is a process that describes interactions among team members who  
19  
20 combine collective resources to resolve task demands (e.g. giving clear orders).[22,23]  
21  
22 Teamwork or team processes can be differentiated from *taskwork*. *Taskwork* denotes a team's  
23  
24 individual interaction with tasks, tools, machines and systems.[23] *Taskwork* is independent of  
25  
26 other team members and is often described as *what* a team is doing whereas *teamwork* is *how* the  
27  
28 members of a team are doing something with each other.[24] Therefore, *team performance*  
29  
30 represents the accumulation of teamwork and taskwork (i.e. what the team actually does).[25]  
31  
32  
33  
34

35  
36 Team performance is often described in terms of inputs, processes and outputs (IPO).[22,26-  
37  
38 28] *Outputs* like quality of care, errors or performance are influenced by team related *processes*  
39  
40 (i.e. teamwork) like communication, coordination or decision making. Furthermore, these  
41  
42 processes are influenced by various *inputs* like team members' experience, task complexity, time  
43  
44 pressure and more. The IPO framework emphasizes the critical role of team processes as the  
45  
46 mechanism by which team members combine their resources and abilities, shaped by the context,  
47  
48 to resolve team task demands. It has been the basis of other more advanced models[27-29] but  
49  
50 has also been criticized because of its simplicity.[30] However, it is still the most popular  
51  
52  
53  
54  
55  
56  
57  
58  
59  
60

1  
2  
3 framework to date and helps to systematize the mechanisms that predict team performance and  
4  
5 represents the basis for the selection of the studies included in our meta-analysis.  
6  
7  
8  
9

### 10 **Contextual factors of teamwork effectiveness**

11  
12 Based on a large body of team research from various domains, we hypothesize that several  
13  
14 contextual and methodological factors might moderate the effectiveness of teamwork, indicating  
15  
16 that teamwork is more important under certain conditions.[31,32] Therefore, we investigate  
17  
18 several factors: (a) team characteristics (i.e. professional composition, team familiarity, team  
19  
20 size); (b) task type (i.e. routine vs. non-routine tasks); (c) two methodological factors related to  
21  
22 patient realism (i.e. simulated vs. real) and the type of performance measures used (i.e. process  
23  
24 vs. outcome performance). In the following we discuss these potentially moderating factors and  
25  
26 the proposed effects on teamwork.  
27  
28  
29

30  
31 *Professional composition.* We distinguished between interprofessional and uniprofessional  
32  
33 teams. Interprofessional teams consist of members from various professions that must work  
34  
35 together in a coordinated fashion.[33] Diverse educational paths in interprofessional teams may  
36  
37 shape respective values, beliefs, attitudes and behaviours.[34] As a result team members with  
38  
39 different backgrounds might perceive and interpret the environment differently and have a  
40  
41 different understanding of how to work together. Therefore, we assume that explicit teamwork is  
42  
43 especially important in interprofessional teams compared to uniprofessional teams.  
44  
45

46  
47 *Team familiarity.* If team members have worked together, they are familiar with their  
48  
49 individual working styles; and roles and responsibilities are usually clear. If a team works  
50  
51 together for the first time, this potential lack of familiarity and clarity might make teamwork  
52  
53 even more important. Therefore, we differentiate between *real teams* that also work together in  
54  
55  
56  
57  
58  
59  
60

1  
2  
3 their everyday clinical practice and *experiential teams* that only came together for study  
4  
5 purposes.  
6

7  
8 *Team size.* Another factor that may moderate the relationship between teamwork and  
9  
10 performance is team size. Since larger teams exhibit more linkages among members than smaller  
11  
12 teams, they also face greater coordination challenges. Also, with increasing size teams have  
13  
14 greater difficulty developing and maintaining role structures and responsibilities. For these  
15  
16 reasons, we expect the influence of teamwork on clinical performance to be stronger in larger  
17  
18 teams as compared to smaller teams.  
19

20  
21 *Task type.* Routine situations are characterized by repetitive and unvarying actions (e.g.  
22  
23 standard anaesthesia induction).[35] In contrast, non-routine situations exhibit more variation  
24  
25 and uncertainty, requiring teams to be flexible and adaptive. Whereas team members mostly rely  
26  
27 on pre-learned sequences during routine situations, during non-routine situations we assume that  
28  
29 teamwork is more important in order for team members to resolve task demands.  
30  
31

32  
33 *Patient realism.* Authors highlight the importance of using medical simulators in  
34  
35 education.[36] Therefore, we investigate the realism used in a study (simulated vs. real patients)  
36  
37 as a potential methodological factor that influences the relationship between teamwork and  
38  
39 performance. Studies conducted with medical simulators might be more standardized and less  
40  
41 influenced by confounding variables than studies conducted with real patients. Therefore, results  
42  
43 from simulation studies might show stronger relationships between the two variables. Further,  
44  
45 using a simulator could cause individuals and teams to act differently than in real settings,  
46  
47 thereby distorting the results. However, in the last decade high-fidelity simulators have become  
48  
49 increasingly realistic, suggesting that the results from simulation studies generalize to real  
50  
51 environments. Including realism as a contextual factor in our analysis will reveal if the effects of  
52  
53  
54  
55  
56  
57  
58  
59  
60

1  
2  
3 teamwork observed in simulation compare with real life settings. Better understanding would  
4  
5 provide important insights about simulation use in teamwork studies.  
6

7  
8 *Performance measures.* As a second methodological factor, we expect that the type of  
9  
10 performance measure used in a study influences the reported teamwork effectiveness. The  
11  
12 literature usually differentiates between process- and outcome-related aspects of  
13  
14 performance.[37,38] Process performance measures are action-related aspects and refer to  
15  
16 adequate behaviour during procedures (e.g. adhering to guidelines), making them easier to  
17  
18 assess. Outcome performance measures (e.g. infection rates after operations) follow team  
19  
20 actions, with assessment occurring later than process measures. Outcome performance measures  
21  
22 suffer from several factors: greater sensitivity to confounding variables (e.g. comorbidities),  
23  
24 assessment challenges, and greater difficulty linking team processes to outcomes. Looking at the  
25  
26 predictors of the survival of cardiac arrest patients illustrates the difference between the two  
27  
28 types of performance measures. The main predictors for the survival (i.e. performance outcome)  
29  
30 of a cardiac arrest patient are “*duration of the arrest*” and “*age of the patient less than 70*”. [39]  
31  
32 Although a team delivers perfect basic life support (i.e. high process performance) the patient  
33  
34 can still die (i.e. low outcome performance). Due to these methodological considerations, we  
35  
36 expect that studies assessing process performance report a stronger relationship between  
37  
38 teamwork and performance than studies assessing outcome performance.  
39  
40  
41  
42  
43  
44  
45  
46  
47  
48  
49  
50  
51  
52  
53  
54  
55  
56  
57  
58  
59  
60

## METHODS

The study was conducted based on the recommendations of the PRISMA statement[40] as well as established guidelines in social sciences.[41,42] Through the combination of studies in the meta-analytical process, we will increase the statistical power and provide an accurate estimation of the true impact that teamwork has on performance.

### Search strategy

We applied the following search strategy to select relevant papers: a) an electronic search of the data base PubMed (no limit was placed on date of publication, last search June 2018) using the key words *teamwork*, *coordination*, *decision making*, *leadership* and *communication* in combination with *patient safety*, *clinical performance*, the final syntax for PubMed is available online (Supplementary File), b) a manual backwards search for all references cited by 8 systematic literature reviews that focus on teamwork or non-technical skills in various healthcare domains,[8,15,17,43-47] c) a manual backwards search for all references cited in studies we included in our meta-analysis, d) a manual forward search using Web of Science to identify studies that cite the studies we included in our meta-analysis, e) identification of relevant unpublished manuscripts via e-mail from authors currently investigating medical teams using specific mailing lists.

### Inclusion criteria

Studies were included if a construct complied to the definition of teamwork processes outlined in the introduction (e.g. coordination, communication). In addition, studies needed to investigate the relationship between at least one teamwork process and a performance measure (e.g. patient outcome). When studies reported multiple estimates of the same relationship from

1  
2  
3 the same sample (e.g. between coordination and more than one indicator of performance), those  
4 correlations were examined separately only as appropriate for sub-analyses, but an average  
5 correlation was computed for all global meta-analyses of those relationships to maintain  
6 independence.[41] We excluded articles investigating long-term care since the dynamics of  
7 teamwork over a longer period of time are different. All articles included in this meta-analysis  
8 are listed in Table 1 and Table 2.

9  
10 For the criterion level of analysis, we included only effect sizes at the team level and not on  
11 an individual level. Therefore, the performance measure had to be clearly linked to a team. This  
12 approach aligns with research that strongly recommends against mixing levels of analysis in  
13 meta-analytic integrations.[48,49]

14  
15 Two reviewers independently screened titles and abstracts from articles yielded in the search.  
16 Afterwards full texts of all relevant articles were obtained and screened by the same two  
17 reviewers. Agreement was above 90%. Any disagreement in the selection process was resolved  
18 through consensus discussion.

### 19 **Data extraction**

20  
21 With the help of a jointly developed coding scheme, studies were independently coded by  
22 one of the authors (JS) and another rater, both with a background in industrial psychology and  
23 human factors. 20% of the studies were rated by both coders. Intercoder agreement was above  
24 90%. Any disagreement was resolved through discussion. The data extracted comprised details  
25 of the authors and publication as well as important study characteristics and statistical  
26 relationships between a teamwork variable and performance (Table 2).

### 27 **Coding of team characteristics**



1  
2  
3 The *professional composition* of teams was coded either as “Interprofessional” if a team  
4 consisted of members from different professions (e.g. nurses and physicians) or as  
5  
6 “Uniprofessional” if the members of the teams were of the same profession. *Team size* was  
7  
8 coded as the number of members (average number if team size varied) of the investigated teams.  
9  
10  
11 Team familiarity was coded either as “experimental” or “real”. “Real” indicates that the team  
12  
13 members also worked together in their everyday clinical practice. “Experimental” means that the  
14  
15 teams only worked together during the study.  
16  
17  
18  
19  
20

#### 21 Coding of task characteristics

22  
23 *Task type* was coded either as “Routine task” or “Non-routine task”. We defined “Non-  
24  
25 routine tasks” as unexpected events that require flexible behavior often under time-pressure (e.g.  
26  
27 emergency situations). “Routine tasks” describe previously planned standard procedures (e.g.  
28  
29 standard anesthesia induction, planned surgery).  
30  
31  
32  
33  
34

#### 35 Coding of methodological factors

36  
37 *Patient realism* was either coded as “Real patient” or “Simulated patient”. “Simulated  
38  
39 patient” included a patient simulator (manikin) whereas “Real patient” included real patients in  
40  
41 clinical settings.  
42  
43

44  
45 *Clinical performance measures* were coded either as “Outcome performance” or “Process  
46  
47 performance”. [38,50] “Outcome performance” includes an outcome that is measured after the  
48  
49 treatment process (e.g. infection rate, mortality). We focused only on patient-related outcomes  
50  
51 and not on team outcomes (e.g. team satisfaction). “Process performance” describes the  
52  
53 evaluation of the treatment process and describes how well the process was executed (e.g.  
54  
55  
56  
57  
58  
59  
60

1  
2  
3 adherence to guidelines through expert rating). Process performance measures are often based on  
4 official guidelines and extensive expert knowledge.[51] Thus, we assumed that process  
5 performance closely relates to patient outcomes.  
6  
7  
8  
9

## 10 **Statistical Analysis**

11  
12 Different types of effect sizes (e.g. Odds ratio,  $F$  values, and  $r$ ) have been reported in the  
13 original studies. We therefore converted the different effect sizes to a common metric, namely  $r$   
14 using the formulas provided by Borenstein et al.[52] and Walker.[53] Moreover, some samples  
15 contained effect sizes of teamwork with two or more measures of performance. Because  
16 independence of the included effects sizes is required for a meta-analysis,[41,54] we used  
17 Fisher's  $z$  score to average the multiple correlations from the same sample. The correlations were  
18 weighted for sample size. However, in contrast to many meta-analyses in social sciences, the  
19 correlations were not adjusted for measurement reliability. This is because information about the  
20 measurement reliability could not be compared (Kappa vs. Cronbach Alpha) or were not  
21 available at all for the majority of studies. Therefore, we report uncorrected, sample-size  
22 weighted mean correlation, its 95% confidence interval (CI), and the 80% credibility interval  
23 (CR). The CI reflects the accuracy of a point estimate and can be used to examine the  
24 significance of the effect size estimates, whereas the CR refers to the deviation of these estimates  
25 and informs us about the existence of possible moderators.  
26  
27  
28  
29  
30  
31  
32  
33  
34  
35  
36  
37  
38  
39  
40  
41  
42  
43

44 Random-effects models were estimated based on two considerations.[55] First, we expected  
45 study heterogeneity to be high given the different study design characteristics such as *patient*  
46 *realism* ("Real patient" vs. "Simulated patient"), *task type* ("Routine task" vs. "Non-routine  
47 task"), and different forms of performance measures. Second, we aimed to provide an inference  
48 on the average effect in the entire population of studies from which the included studies are  
49  
50  
51  
52  
53  
54  
55  
56  
57  
58  
59  
60

1  
2  
3 assumed to be a random selection of it. Therefore, random-effects models were estimated.[55]  
4  
5 These models were calculated by the restricted maximum-likelihood estimator, an efficient and  
6  
7 unbiased estimator.[56] Since we included only descriptive studies and no interventions we only  
8  
9 included the sample size of the individual studies as a potential bias into the meta-analysis. To  
10  
11 rule out a potential publication bias, we tested for funnel plot asymmetry using the random-effect  
12  
13 version of the Egger test.[57] The results indicate that there is no asymmetry in the funnel plot ( $z$   
14  
15  $= 1.79$ ,  $p = .074$ ), suggesting that there is no publication bias.  
16  
17  
18

19 The estimation of meta-analytical models including the outlier analyses were performed  
20  
21 with the package “metafor” from the programming language and statistical environment R.[55]  
22  
23

## 24 **Patient and public involvement**

25  
26 Patients and public were not involved in this study.  
27  
28  
29

## 30 **RESULTS**

31  
32 The online search resulted in 2002 articles (Figure 1). Based on title and abstract 67 articles  
33  
34 were selected for a full text review. Full text examination, forward and backward search of  
35  
36 selected articles and relevant reviews resulted in 30 studies coming from 28 articles (Two  
37  
38 publications presented two independent studies in one publication[58,59]). Two additional  
39  
40 studies were identified via contacting authors directly and have been presented at conferences in  
41  
42 the past.[60,61] This led to a total of 32 studies coming from 30 articles. One case (Carlson et  
43  
44 al.,[9]  $r = .89$ ,  $n = 44$ , standardized residual score = 4.26) was identified as outlier and therefore  
45  
46 excluded from further analyses, resulting in a final sample size of  $k = 31$ .  
47  
48  
49

50  
51 Table 1 provides a qualitative description of the selected articles including study objectives,  
52  
53 the setting in which the studies were carried out and a description of the teamwork processes as  
54  
55  
56  
57  
58  
59

well as the outcome measures that were assessed. If a specific tool for the assessment of a teamwork process or outcome measure was used this is indicated in the corresponding column. Observational studies were most prevalent. Teamwork processes were assessed using either behaviourally anchored rating scales ( $N=8$ ) or structured observation ( $N=19$ ) of specific teamwork behaviour. Structured observation—as we describe it—is defined as a purely descriptive assessment of certain behaviour usually using a predefined observation system (e.g. amount of speaking up behaviour). In contrast, behaviourally anchored rating scales consist of an evaluation of teamwork process behaviour by an expert. Only three studies used surveys to assess teamwork behaviours. The majority of the studies ( $N=27$ ) assessed process performance using either a checklist-based expert rating or assessing a reaction time measure after the occurrence of a certain event (e.g. time until intervention). Only four studies assessed outcome performance measures. Measures included accuracy of diagnosis, postoperative complications and death, surgical morbidity and mortality, ventilator-associated pneumonia, bloodstream infections, pressure ulcers and acute physiology and chronic health evaluation score. Table 2 provides an overview of all variables included in the meta-analysis including the effect sizes and moderator variables.

### **Effect of teamwork and contextual factors**

Table 3 and Figure 2 shows the relationship between teamwork and team performance. The sample-sized weighted mean correlation was .28 (95% CI: .20 to .35,  $z = 6.55$ ,  $p < .001$ ), indicating that teamwork is positively related to clinical performance. Results further indicated heterogeneous effect size distributions across the included samples ( $Q = 53.73$ ,  $p < .05$ ,  $I^2 =$

1  
2  
3 45.96), signifying that the variability across the sample effect sizes was more than what would be  
4  
5 expected from sampling error alone.  
6

7  
8 To test for moderator effects of the contextual factors, we conducted mixed-effects  
9  
10 models including the mentioned moderators: *professional composition, team familiarity, team*  
11  
12 *size, task type, patient realism and performance measures.*  
13

14  
15 The omnibus test of moderators was not significant ( $F = 0.18, df_1 = 6, df_2 = 18, p > .20$ ),  
16  
17 suggesting that the examined contextual factors did not influence the average effect of teamwork  
18  
19 on clinical performance. To provide greater detail about the role of the contextual factors, we  
20  
21 conducted separate analyses for the categorical contextual factors and report them in Table 3.  
22  
23  
24  
25  
26  
27  
28  
29  
30  
31  
32  
33  
34  
35  
36  
37  
38  
39  
40  
41  
42  
43  
44  
45  
46  
47  
48  
49  
50  
51  
52  
53  
54  
55  
56  
57  
58  
59  
60

## DISCUSSION

With this study, we aimed to provide evidence for the performance implications of teamwork in healthcare teams. By including various contextual factors, we investigated potential contingencies that these factors might have on the relationship between teamwork and clinical performance. The analysis of 1390 teams from 31 different studies showed that teamwork has a medium sized effect ( $r=.28$ ; [62,63]) on clinical performance across various care settings. Our study is the first to investigate this relationship quantitatively with a meta-analytical procedure. This finding aligns with and advances previous work that explored this relationship in a qualitative way.[8,15,17,43-47]

At first glance a correlation of  $r=.28$  might not seem very high. However, we would like to highlight that  $r=.28$  is considered a medium sized effect[62,63] and should not be underestimated. To better illustrate what this effect means we transformed the correlation into an odds ratio (OR) of 2.8.[52] Of course, this transformation simplifies the correlation because teamwork and often the outcome measures are not simple dichotomous variables that can be divided into an intervention and control group. However, this transformation illustrates that teams who engage in teamwork processes are 2.8 times more likely to achieve high performance than teams who are not. Looking at the performance measures in our study we see that they either describe patient outcomes (e.g. mortality, morbidity) or are closely related to patient outcomes (e.g. adherence to treatment guidelines). Thus, we consider teamwork a performance-relevant process that needs to be promoted through training and implementation into treatment guidelines and policies.

The included studies used a variety of different measures for clinical performance. This variability resulted from the different clinical contexts in which the studies were carried out.

1  
2  
3 There is no universal measure for clinical performance because the outcome is in most cases  
4 context specific. In surgery, common performance measures are surgical complications,  
5 mortality or morbidity.[64] In anaesthesia, studies often use expert ratings based on checklists to  
6 assess the provision of anaesthesia. Expert ratings are also the common form of performance  
7 assessment in simulator settings where patient outcomes like morbidity or mortality cannot be  
8 measured. Future studies need to be aware that clinical performance measures depend on the  
9 clinical context and that the development of valid performance measures requires considerable  
10 effort and scientific rigor. Guidelines on how to develop performance assessment tools for  
11 specific clinical scenarios exist and need to be accounted for.[51,65,66] Furthermore, depending  
12 on the clinical setting researchers need to evaluate what specific clinical performance measures  
13 are suitable and if and how they can be linked to team processes in a meaningful way.  
14  
15  
16  
17  
18  
19  
20  
21  
22  
23  
24  
25  
26  
27

28 The analysis of moderators illustrates that teamwork is related with performance under a  
29 variety of conditions. Our results suggest that teams in different contexts characterised by  
30 different team constellations, team size and levels of acuity of care all benefit from teamwork.  
31 Therefore, clinicians and educators from all fields should strive to maintain or increase effective  
32 teamwork. In recent years, there has been an upsurge in crisis resource management (CRM).[19]  
33 These trainings focus on team management and implement various teamwork principles during  
34 crisis situations (e.g. emergencies).[67] Our results suggest that team trainings should not only  
35 focus on non-routine situations like emergencies but also on routine situations (e.g. routine  
36 anaesthesia induction, routine surgery) because based on our data teamwork is equally important  
37 in such situations.  
38  
39  
40  
41  
42  
43  
44  
45  
46  
47  
48  
49  
50

51 A closer look at methodological factors of the included studies revealed that the observed  
52 relationship between teamwork and performance in simulation settings does not differ from  
53  
54  
55  
56  
57  
58  
59  
60

1  
2  
3 relationships observed in real settings. Therefore, we conclude that teamwork studies conducted  
4  
5 in simulation settings generalize to real life settings. Further, the analysis of different  
6  
7 performance measures reveals a trend towards process performance measures being more  
8  
9 strongly related with teamwork than outcome performance measures. A possible explanation of  
10  
11 this finding relates to the difficulty of investigating outcome performance measures in a manner  
12  
13 isolated from other variables. Nevertheless, we still found a significant relationship between  
14  
15 teamwork and objective patient outcomes (e.g. postoperative complications, bloodstream  
16  
17 infections) despite the methodological challenges of measuring outcome performance and the  
18  
19 small number of studies using outcome performance ( $k = 4$ ).  
20  
21  
22

23  
24 Our results are in line with previous meta-analyses investigating the effectiveness of team  
25  
26 training in healthcare.[18,19] Similar to our results, Hughes et al. highlighted the effectiveness of  
27  
28 team trainings under a variety of conditions—irrespective of team composition,[18] simulator  
29  
30 fidelity or patient acuity of the trainee's unit as well as other factors.  
31  
32

33 We were unable to find a moderation of task type in our study, potentially explained by task  
34  
35 interdependence, which reflects the degree to which team members depend on one another for  
36  
37 their effort, information, and resources.[68] A meta-analysis including teams from multiple  
38  
39 industries (e.g. project teams, management teams) found that task interdependence moderates the  
40  
41 relationship between teamwork and performance, demonstrating the importance of teamwork for  
42  
43 highly interdependent team tasks.[69] Most studies included in our analysis focused on rather  
44  
45 short and intense patient care episodes (e.g. a surgery, a resuscitation task) with high task  
46  
47 interdependence, which may explain the high relevance of teamwork for all these teams.  
48  
49  
50  
51  
52  
53  
54  
55  
56  
57  
58  
59  
60



### Limitations and future directions

Despite greater attention to healthcare team research and team training over the last decade, we were only able to identify 32 studies (31 included in the meta-analysis). Of note, over two-thirds of the studies in our analysis emerged in the last 10 years, reflecting the increasing interest in the topic. The rather small number of studies might relate to the difficulties in quantifying teamwork, the considerable theoretical and methodological knowledge required, and the challenges of capturing relevant outcome measures. Also, besides the manual searches of selected articles and reviews and contacting authors in the field we did only search the data base PubMed.

Future research should build on recent theoretical and applied work[24,26,28,70] about teamwork and use this current meta-analysis as a signpost for future investigations. In order to move our field forward, we must use existing conceptual frameworks[22,24,26] and establish standards for investigating teams and teamwork. This can often only be achieved with interdisciplinary research teams including experts from the medical fields but equally important from health professions education, psychology or communication studies.

Another limitation relates to the unbalanced analysis of subgroups. For example, we only identified four studies that used outcome performance variables compared to 27 using process performance measures. Uneven groups may reduce the power to detect significant differences. Therefore, we encourage future studies to include outcome performance measures despite the effort required.

Finally, more factors may influence the relationship between teamwork and performance that we were unable to extract from the studies. While we tested for the effects of team familiarity by comparing experimental teams and real teams, this does not fully capture team member

1  
2  
3 familiarity. The extent to which team members actually worked together during prior clinical  
4  
5 practice might predict of how effectively they perform together. However, even two people  
6  
7 working in the same ward might actually not have interacted much during patient care depending  
8  
9 on the setting. Also team climate on a ward or in a hospital may be an important predictor of how  
10  
11 well teams work together, especially related to sharing information or speaking up within the  
12  
13 team.[71,72]  
14

15  
16  
17 Finally, the clinical context might play a role in how team members collaborate. In different  
18  
19 disciplines, departments or healthcare institutions different norms and routines exist on how to  
20  
21 work together. Therefore study results and recommendations about teamwork need to be  
22  
23 interpreted in the light of the respective clinical context. There are empirical indications that a  
24  
25 one-size-fits-all approach might not be suitable and team training efforts cannot ignore the  
26  
27 clinical context, especially the routines and norms about collaboration.[73] We acknowledge that  
28  
29 there might be other factors surrounding healthcare teams that might potentially influence  
30  
31 teamwork and clinical performance. However, in this review we could only extract data that was  
32  
33 reported in the primary studies. Since these were limited in the healthcare contexts studied, the  
34  
35 results might not generalise to long-term care settings or mental health, for example. Future work  
36  
37 needs to consider and also document a broader range of potentially influencing factors.  
38  
39  
40  
41  
42  
43

## 44 **Conclusion**

45  
46  
47 The current meta-analysis confirms that teamwork across various team compositions  
48  
49 represents a powerful process to improve patient care. Good teamwork can be achieved by joint  
50  
51 reflection about teamwork during clinical event debriefings[74,75] as well as team trainings[76]  
52  
53  
54  
55  
56  
57  
58  
59  
60

1  
2  
3 and system improvement. All healthcare organisations should recognise these findings and place  
4  
5 continuous efforts into maintaining and improving teamwork for the benefit of their patients.  
6  
7  
8  
9  
10  
11  
12  
13  
14  
15  
16  
17  
18  
19  
20  
21  
22  
23  
24  
25  
26  
27  
28  
29  
30  
31  
32  
33  
34  
35  
36  
37  
38  
39  
40  
41  
42  
43  
44  
45  
46  
47  
48  
49  
50  
51  
52  
53  
54  
55  
56  
57  
58  
59  
60

For peer review only

1  
2  
3 **Funding statement:** This work was funded by the European Society of Anaesthesiology (ESA)  
4 and the Swiss National Science Foundation (SNSF, Grant No. P300P1\_177695). The ESA  
5 provided resources for an additional research assistant helping with literature search and  
6 selection. Part of the salary of JS was funded by the SNSF.  
7  
8  
9

10  
11  
12 **Competing interests:** All authors have completed the Unified Competing Interest form  
13 (available on request from the corresponding author) and declare no support from any  
14 organisation for the submitted work; no financial relationships with any organisations that might  
15 have an interest in the submitted work; no other relationships or activities that could appear to  
16 have influenced the submitted work.  
17  
18  
19

20  
21  
22 **Author contributions:** All authors substantially contributed to this study and were involved in  
23 the study design. JS drafted the paper. LM analysed the data and revised the manuscript for  
24 content. TM revised the manuscript for content and language. All authors approved the final  
25 version.  
26  
27  
28

29  
30  
31  
32 **Ethics approval:** Not required  
33

34  
35 **Acknowledgements:** The authors thank Manuel Stühlinger for his help with study selection and  
36 data extraction and Walter J. Eppich, MD, PhD for a critical review and proof reading the  
37 manuscript.  
38  
39  
40

41  
42 **Data sharing:** Meta-analysis dataset is available from the corresponding author.  
43  
44  
45  
46  
47  
48  
49  
50  
51  
52  
53  
54  
55  
56  
57  
58  
59  
60

**REFERENCE**

- 1 Thomas EJ. Improving teamwork in healthcare: current approaches and the path forward. *BMJ Quality & Safety* 2011;20:647–50.
- 2 Salas E, Rosen MA. Building high reliability teams: progress and some reflections on teamwork training. *BMJ Quality & Safety* 2013;22:369–73.
- 3 Schraag JM, Schouten T, Smit M, Haas F, van der Beek D, van de Ven J, et al. A prospective study of paediatric cardiac surgical microsystems: assessing the relationships between non-routine events, teamwork and patient outcomes. *BMJ Quality & Safety* 2011;20:599–603.
- 4 Williams AL, Lasky RE, Dannemiller JL, Andrei AM, Thomas EJ. Teamwork behaviours and errors during neonatal resuscitation. *BMJ Quality & Safety* 2010;19:60–4.
- 5 Guerlain S, Turrentine FE, Bauer DT, Calland JF, Adams R. Crew resource management training for surgeons: Feasibility and impact. *Cognition, Technology & Work* 2008;10:255–64.
- 6 McCulloch P, Mishra A, Handa A, Dale T, Hirst G, Catchpole K. The effects of aviation-style non-technical skills training on technical performance and outcome in the operating theatre. *Qual Saf Health Care* 2009;18:109–15.
- 7 Yule S, Flin R, Maran N, Youngson G, Mitchell A, Rowley D, et al. Debriefing surgeons on non-technical skills (NOTSS). *Cogn Tech Work* 2007;139:131–274.
- 8 Schmutz J, Manser T. Do team processes really have an effect on clinical performance? A systematic literature review. *Br J Anaesth* 2013;110:529–44.
- 9 Carlson J, Min E, Bridges D. The impact of leadership and team behavior on standard of

- 1  
2  
3 care delivered during human patient simulation: A pilot study for undergraduate medical  
4  
5 students. *Teach Learn Med* 2009;21:24–32.  
6  
7  
8 10 Mishra A, Catchpole K, McCulloch P. The Oxford NOTECHS System: Reliability and  
9  
10 validity of a tool for measuring teamwork behaviour in the operating theatre. *Qual Saf*  
11  
12 *Health Care* 2009;18:104–8.  
13  
14  
15 11 Manojlovich M, DeCicco B. Healthy Work Environments, Nurse-Physician  
16  
17 Communication, and Patients Outcomes. *Am J Crit Care* 2007;16:536–43.  
18  
19  
20 12 Schmutz J, Hoffmann F, Heimberg E, Manser T. Effective coordination in medical  
21  
22 emergency teams: The moderating role of task type. *European Journal of Work and*  
23  
24 *Organizational Psychology* 2015;24:761–76.  
25  
26  
27 13 Tschan F, Semmer NK, Nägele C, Gurtner A. Task adaptive behavior and performance  
28  
29 in groups. *Group Processes & Intergroup Relations* 2000;3:367–86.  
30  
31  
32 14 Manser T. Teamwork and patient safety in dynamic domains of healthcare: a review of  
33  
34 the literature. *Acta Anaesthesiol Scand* 2009;53:143–51.  
35  
36  
37 15 Fernandez Castela E, Russo SG, Riethmüller M, Boos M. Effects of team coordination  
38  
39 during cardiopulmonary resuscitation: A systematic review of the literature. *J Crit Care*  
40  
41 2013;28:504–21.  
42  
43  
44 16 Dietz AS, Pronovost PJ, Benson KN, Mendez-Tellez PA, Dwyer C, Wyskiel R, et al. A  
45  
46 systematic review of behavioural marker systems in healthcare: what do we know about  
47  
48 their attributes, validity and application? *BMJ Quality & Safety* 2014;23:1031–9.  
49  
50  
51 17 Flowerdew L, Brown R, Vincent C, Woloshynowych M. Identifying nontechnical skills  
52  
53 associated with safety in the emergency department: a scoping review of the literature.  
54  
55 *Ann Emerg Med* 2012;59:386–94.  
56  
57  
58  
59  
60

- 1  
2  
3 18 Hughes AM, Gregory ME, Joseph DL, Sonesh SC, Marlow SL, Lacerenza CN, et al.  
4  
5 Saving Lives: A Meta-Analysis of Team Training in Healthcare. *J Appl Psychol*  
6  
7 2016;1266–304.  
8  
9  
10 19 O'Dea A, O'Connor P, Keogh I. A meta-analysis of the effectiveness of crew resource  
11  
12 management training in acute care domains. *Postgrad Med J* 2014;90:699–708.  
13  
14 20 Salas E, Rosen MA, King H. Managing teams managing crises: principles of teamwork  
15  
16 to improve patient safety in the Emergency Room and beyond. *Theoretical Issues in*  
17  
18 *Ergonomics Science* 2007;8:381–94.  
19  
20  
21 21 Salas E, Stagl KC, Burke CS, Goodwin GF. Fostering team effectiveness in  
22  
23 organizations: Toward an integrative theoretical framework. vol. 52, 2007, p. 185.  
24  
25  
26 22 Fernandez R, Kozlowski SW, Shapiro MJ, Salas E. Toward a definition of teamwork in  
27  
28 emergency medicine. *Acad Emerg Med* 2008;15:1104–12.  
29  
30  
31 23 Bowers CA, Braun CC, Morgan BB. Team workload: Its meaning and measurement. In:  
32  
33 Brannik MT, Salas E, Prince C, editors. *Team Performance Assessment and*  
34  
35 *Measurement: Theory, methods, and applications*, New York: Team performance  
36  
37 assessment and measurement: Theory, methods, and applications; 1997, pp. 85–108.  
38  
39  
40 24 Marks MA, Mathieu JE, Zaccaro SJ. A temporally based framework and taxonomy of  
41  
42 team processes. *The Academy of Management Review* 2001;26:356–76.  
43  
44  
45 25 Dietz AS, Pronovost PJ, Mendez-Tellez PA, Wyskiel R, Marsteller JA, Thompson DA,  
46  
47 et al. A systematic review of teamwork in the intensive care unit: What do we know  
48  
49 about teamwork, team tasks, and improvement strategies? *J Crit Care* 2014;29:908–14.  
50  
51  
52 26 Reader TW, Flin R, Mearns K, Cuthbertson BH. Developing a team performance  
53  
54 framework for the intensive care unit. *Crit Care Med* 2009;37:1787–93.  
55  
56  
57  
58  
59  
60

- 1  
2  
3 27 Ilgen DR, Hollenbeck JR, Johnson M, Jundt D. Teams in organizations: From input-  
4 process-output models to IMO models. *Annu Rev Psychol* 2005;56:517–43.  
5  
6  
7 28 Burke CS, Stagl KC, Salas E, Pierce L, Kendall D. Understanding team adaptation: a  
8 conceptual analysis and model. *J Appl Psychol* 2006;91:1189–207.  
9  
10  
11 29 Lemieux-Charles L. What Do We Know about Health Care Team Effectiveness? A  
12 Review of the Literature. *Med Care Res Rev* 2006;63:263–300.  
13  
14  
15 30 Kozlowski SWJ. Advancing research on team process dynamics: Theoretical,  
16 methodological, and measurement considerations. *Organizational Psychology Review*  
17 2015;5:270–99.  
18  
19  
20 31 Maloney MM, Bresman H, Zellmer-Bruhn ME, Beaver GR. Contextualization and  
21 Context Theorizing in Teams Research: A Look Back and a Path Forward. *The*  
22 *Academy of Management Annals* 2016;10:891–942.  
23  
24  
25 32 Kozlowski SW, Klein KJ. A multilevel approach to theory and research in  
26 organizations: Contextual, temporal, and emergent processes. 2000.  
27  
28  
29 33 Schofield RF, Amodeo M. Interdisciplinary teams in health care and human services  
30 settings: are they effective? *Health & Social Work* 1999;24:210–9.  
31  
32  
33 34 Hall P. Interprofessional teamwork: Professional cultures as barriers. *Journal of*  
34 *Interprofessional Care* 2005;19:188–96.  
35  
36  
37 35 Lillrank P. The quality of standard, routine and nonroutine processes. *Organization*  
38 *Studies* 2003;24:215–33.  
39  
40  
41 36 Eppich WJ, O'Connor L, Adler M. Providing effective simulation activities. In: Forrest  
42 K, McKimm J, Edgar S, editors. *Essential Simulation in Clinical Education*, Oxford,  
43 UK: John Wiley & Sons, Ltd; 2013, pp. 213–34.  
44  
45  
46  
47  
48  
49  
50  
51  
52  
53  
54  
55  
56  
57  
58  
59  
60



- 1  
2  
3 37 Anderson N, Ones DS, Sinangil HK, Viswesvaran C. Handbook of industrial, work and  
4 organizational psychology: Personnel psychology. vol. 1. London: Sage Publications  
5 Ltd; 2001.  
6  
7  
8  
9  
10 38 Sonnentag S, Frese M. Performance concepts and performance theory. Psychological  
11 Management of Individual Performance 2002;23:3–25.  
12  
13  
14 39 Cooper S, Cade J. Predicting survival, in-hospital cardiac arrests: resuscitation survival  
15 variables and training effectiveness. Resuscitation 1997;35:17–22.  
16  
17  
18  
19 40 Liberati A, Altman DG, Tetzlaff J, Mulrow C, Gøtzsche PC, Ioannidis JPA, et al. The  
20 PRISMA Statement for Reporting Systematic Reviews and Meta-Analyses of Studies  
21 That Evaluate Health Care Interventions: Explanation and Elaboration. PLoS Med  
22 2009;6:e1000100.  
23  
24  
25  
26  
27  
28 41 Hunter JE, Schmidt FL. Methods of meta-analysis: Correcting error and bias in research  
29 findings. Thousand Oaks, CA: Sage Publications; 2004.  
30  
31  
32  
33 42 Card N. Applied Meta-Analysis for Social Science Research. New York: Guilford  
34 Publications; 2015.  
35  
36  
37  
38 43 Fletcher GCL, McGeorge P, Flin RH, Glavin RJ, Maran NJ. The role of non-technical  
39 skills in anaesthesia: a review of current literature. Br J Anaesth 2002;88:418–29.  
40  
41  
42 44 Ghaferi AA, Dimick JB. Importance of teamwork, communication and culture on  
43 failure-to-rescue in the elderly. British Journal of Surgery 2016;103.  
44  
45  
46  
47 45 Mitchell L, Flin R. Non-technical skills of the operating theatre scrub nurse: literature  
48 review. J Adv Nurs 2008;63:15–24.  
49  
50  
51  
52 46 Santos R, Bakero L, Franco P, Alves C, Fragata I, Fragata J. Characterization of non-  
53 technical skills in paediatric cardiac surgery: communication patterns. Eur J  
54  
55  
56  
57  
58  
59  
60

- 1  
2  
3 Cardiothorac Surg 2012;41:1005–12.  
4  
5  
6 47 Youngson GG. Nontechnical skills in pediatric surgery: Factors influencing operative  
7  
8 performance. *Journal of Pediatric Surgery* 2016;51:226–30.  
9  
10 48 Gully SM, Devine DJ, Whitney DJ. A meta-analysis of cohesion and performance  
11  
12 effects of level of analysis and task interdependence. *Small Group Research*  
13  
14 1995;26:497–520.  
15  
16  
17 49 Hunter JE, Schmidt FL. Dichotomization of continuous variables: The implications for  
18  
19 meta-analysis. *Journal of Applied Psychology* 1990;75:334.  
20  
21  
22 50 Campbell JP. Modeling the performance prediction problem in industrial and  
23  
24 organizational psychology. In: Dunnette MD, Hough LM, editors. *Handbook of*  
25  
26 *industrial and organizational psychology*, Palo Alto, CA: Consulting Psychologists  
27  
28 Press; 1990, pp. 687–732.  
29  
30  
31 51 Schmutz J, Eppich WJ, Hoffmann F, Heimberg E, Manser T. Five steps to develop  
32  
33 checklists for evaluating clinical performance: An integrative approach. *Acad Med*  
34  
35 2014;89:996–1005.  
36  
37  
38 52 Borenstein M, Hedges LV, Higgins JPT, Rothstein HR. *Introduction to Meta-Analysis*.  
39  
40 Hoboken, NJ: John Wiley & Sons, Ltd; 2009.  
41  
42  
43 53 Walker DA. JMASM9: converting Kendall's tau for correlational or meta-analytic  
44  
45 analyses. *J Mod Appl Stat Meth* 2003;2:525–30.  
46  
47  
48 54 Lipsey MW, Wilson D. *Practical meta-analysis*. New York: Sage Publications, Inc;  
49  
50 2001.  
51  
52 55 Viechtbauer W. Conducting meta-analyses in R with the metafor package. *J Stat Softw*  
53  
54 2010;36:1–48.  
55  
56  
57  
58  
59  
60

- 1  
2  
3 56 Viechtbauer W. Bias and efficiency of meta-analytic variance estimators in the random-  
4 effects model. *Journal of Educational and Behavioral Statistics* 2005;30:261–93.  
5  
6  
7  
8 57 Sterne JA, Egger M. Regression methods to detect publication and other bias in meta-  
9 analysis. *Publication bias in meta-analysis: Prevention, assessment and adjustments*,  
10 Chichester: John Wiley & Sons; 2006, pp. 99–110.  
11  
12  
13  
14 58 Catchpole KR, Giddings AE, Wilkinson M, Hirst G, Dale T, de Leval MR. Improving  
15 patient safety by identifying latent failures in successful operations. *Surgery*  
16  
17 2007;142:102–10.  
18  
19  
20  
21 59 Catchpole K, Mishra A, Handa A, McCulloch P. Teamwork and Error in the Operating  
22 Room. *Ann Surg* 2008;247:699–706.  
23  
24  
25  
26 60 Brogaard L, Kierkegaard O, Hvidmand L, Jensen KR, Uldbjerg N, Musaeus P, et al. Is  
27 non-technical performance the key to high clinical performance in obstetric teams? th  
28 Annual conference of the British Maternal Fetal Medicine Society, 2018.  
29  
30  
31  
32  
33 61 Manser T, Bogdanovic J, Clack L., Arora S, Sevdalis N., Schmutz, J. Surgeon's team  
34 management skills predict clinical performance. Paper presented at the Annual Meeting  
35 of the Society in Europe for Simulation Applied to Medecine (SESAM), Lisbon,  
36 Portugal, 2015.  
37  
38  
39  
40  
41  
42 62 Cohen J. *Statistical power analysis for the behavioral sciences*. Hillsdale, NJ: Erlbaum;  
43 1988.  
44  
45  
46  
47 63 Bosco FA, Aguinis H, Singh K, Field JG, Pierce CA. Correlational effect size  
48 benchmarks. *Journal of Applied Psychology* 2015;100:431.  
49  
50  
51 64 Haynes AB, Weiser TG, Berry WR, Lipsitz SR, Breizat A-HS, Dellinger EP, et al. A  
52 surgical safety checklist to reduce morbidity and mortality in a global population. *N*  
53  
54  
55  
56  
57  
58  
59  
60

- 1  
2  
3 Engl J Med 2009;360:491–9.  
4  
5  
6 65 Gaba DM, Howard SK, Flanagan B, Smith BE, Fish KJ, Botney R. Assessment of  
7  
8 Clinical Performance during Simulated Crises Using Both Technical and Behavioral  
9  
10 Ratings. *Anesthesiology* 1998;89:8–18.  
11  
12 66 Rosen MA, Pronovost PJ. Advancing the use of checklists for evaluating performance  
13  
14 in health care. *Acad Med* 2014;89.  
15  
16  
17 67 Gaba DM, Howard SK, Fish KJ, Smith BE, Sowb YA. Simulation-based training in  
18  
19 anesthesia crisis resource management (ACRM): a decade of experience. *Simulation &*  
20  
21 *Gaming* 2001;32:175–93.  
22  
23  
24 68 Wageman R, Baker G. Incentives and cooperation: The joint effects of task and reward  
25  
26 interdependence on group performance. *J Organiz Behav* 1997:139–58.  
27  
28  
29 69 LePine JA, Piccolo RF, Jackson CL, Mathieu JE, Saul JR. A meta-analysis of teamwork  
30  
31 processes: tests of a multidimensional model and relationships with team effectiveness  
32  
33 criteria. *Pers Psychol* 2008;61:273–307.  
34  
35  
36 70 Maynard MT, Kennedy DM, Sommer SA. Team adaptation: A fifteen-year synthesis  
37  
38 (1998–2013) and framework for how this literature needs to “adapt” going forward.  
39  
40 *European Journal of Work and Organizational Psychology* 2015;24:1–26.  
41  
42  
43 71 Edmondson AC. *Teaming: How organizations learn, innovate, and compete in the*  
44  
45 *knowledge economy*. San Francisco, CA: Jossey-Bass; 2012.  
46  
47  
48 72 Edmondson AC, Lei Z. Psychological safety: The history, renaissance, and future of an  
49  
50 interpersonal construct. *Annu Rev Organ Psychol Organ Behav* 2014;1:23–43.  
51  
52  
53 73 Henrickson Parker, S., Schmutz, J. B., & Manser, T. Training needs for adaptive  
54  
55 coordination: Utilizing task analysis to identify coordination requirements in three  
56  
57  
58  
59  
60

- different clinical settings. *Gr & Org Manag* 2018;43:504-527.
- 74 Eppich WJ, Mullan PC, Brett-Fleegler M, Cheng A. “Let’s Talk About It”: Translating Lessons From Health Care Simulation to Clinical Event Debriefings and Coaching Conversations. *Clinical Pediatric Emergency Medicine* 2016;17:200–11.
- 75 Schmutz JB, Eppich WJ. Promoting learning and patient care through shared reflection: A conceptual framework for team reflexivity in healthcare. *Acad Med* 2017;92:1555–63.
- 76 Salas E, DiazGranados D, Weaver SJ, King H. Does Team Training Work? Principles for Health Care. *Acad Emerg Med* 2008;15:1002–9.
- 77 Amacher SA, Schumacher C, Legeret C, et al. Influence of Gender on the Performance of Cardiopulmonary Rescue Teams: A Randomized, Prospective Simulator Study. *Crit Care Med* 2017.
- 78 Burtscher MJ, Kolbe M, Wacker J, et al. Interactions of team mental models and monitoring behaviors predict team performance in simulated anesthesia inductions. *J Exp Psychol Appl* 2011;17:257–69.
- 79 Burtscher MJ, Manser T, Kolbe M, et al. Adaptation in anaesthesia team coordination in response to a simulated critical event and its relationship to clinical performance. *Br J Anaesth* 2011;106:801–6.
- 80 Burtscher MJ, Wacker J, Grote G, et al. Managing nonroutine events in anesthesia: the role of adaptive coordination. *Hum Factors* 2010;52:282–94.
- 81 Cooper S, Wakelam A. Leadership of resuscitation teams: “Lighthouse Leadership.” *Resuscitation* 1999;42:27–45.
- 82 Davenport DL, Henderson WG, Mosca CL, et al. Risk-adjusted morbidity in teaching

1  
2  
3 hospitals correlates with reported levels of communication and collaboration on surgical  
4 teams but not with scale measures of teamwork climate, safety climate, or working  
5 conditions. *J Am Coll Surg* 2007;205:778–84.  
6  
7

8  
9  
10 83 El Bardissi AW, Wiegmann DA, Henrickson S, et al. Identifying methods to improve  
11 heart surgery: an operative approach and strategy for implementation on an  
12 organizational level. *Eur J Cardiothorac Surg* 2008;34:1027–33.  
13  
14

15  
16  
17 84 Gillespie BM, Chaboyer W, Fairweather N. Factors that influence the expected length  
18 of operation: results of a prospective study. *BMJ Qual Saf* 2012;21:3–12.  
19  
20

21  
22 85 Kolbe M, Burtscher MJ, Wacker J, et al. Speaking Up Is Related to Better Team  
23 Performance in Simulated Anesthesia Inductions: An Observational Study. *Anesth*  
24 *Analg* 2012.  
25  
26

27  
28  
29 86 Künzle B, Zala-Mezo E, Wacker J. Leadership in anaesthesia teams: the most effective  
30 leadership is shared. *Qual Saf Health Care* 2010;19:1–6.  
31  
32

33  
34 87 Manojlovich M, DeCicco B. Healthy Work Environments, Nurse-Physician  
35 Communication, and Patients Outcomes. *Am J Crit Care* 2007;16:536–43.  
36  
37

38  
39 88 Marsch SCU, Müller C, Marquardt K, et al. Human factors affect the quality of  
40 cardiopulmonary resuscitation in simulated cardiac arrests. *Resuscitation* 2004;60:51–6.  
41  
42

43  
44 89 Mazzocco K, Petitti DB, Fong KT, et al. Surgical team behaviors and patient outcomes.  
45 *Am J Surg* 2009;197:678–85.  
46

47  
48 90 Mishra A, Catchpole K, Dale T, et al. The influence of non-technical performance on  
49 technical outcome in laparoscopic cholecystectomy. *Surg Endosc* 2007;22:68–73.  
50

51  
52 91 Schmutz J, Hoffmann F, Heimberg E, et al. Effective coordination in medical  
53 emergency teams: The moderating role of task type. *Europ J Work Org Psych*  
54  
55

- 2015;24:761–76.
- 92 Siassakos D, Bristowe K, Draycott TJ, et al. Clinical Efficiency in a Simulated Emergency and Relationship to Team Behaviors: A Multisite Cross-sectional Study. *Obstet Anesth Digest* 2012;32:41.
- 93 Siassakos D, Fox R, Crofts JF, et al. The management of a simulated emergency: Better teamwork, better performance. *Resuscitation*
- 94 Thomas EJ, Sexton JB, Lasky RE, et al. Teamwork and quality during neonatal care in the delivery room. *J Perinatol* 2006;26:163–9.
- 95 Tschan F, Semmer NK, Gautschi, et al. Leading to Recovery: Group Performance and Coordinative Activities in Medical Emergency Driven Groups. *Hum Perf* 2006;19:277–304.
- 96 Tschan F, Semmer NK, Gurtner A, et al. Explicit reasoning, confirmation bias, and illusory transactive memory: A simulation study of group medical decision making. *Small Group Res* 2009;40:271–300.
- 97 Westli H, Johnsen B, Eid J, et al. Teamwork skills, shared mental models, and performance in simulated trauma teams: an independent group design. *Scand J Trauma Resusc Emerg Med* 2010;18:47.
- 98 Wiegmann DA, ElBardissi AW, Dearani JA. Disruptions in surgical flow and their relationship to surgical errors: an exploratory investigation. *Surgery* 2007;142:658–65.
- 99 Williams AL, Lasky RE, Dannemiller JL, et al. Teamwork behaviours and errors during neonatal resuscitation. *Qual Saf Health Care* 2010;19:60–4.
- 100 Wright MC, Phillips-Bute BG, Petrusa ER et al. Assessing teamwork in medical education and practice: relating behavioural teamwork ratings and clinical performance.

1  
2  
3 *Med Teach* 2009;31:30–8.  
4

- 5 101 Yamada NK, Fuerch JH, Halamek LP. Impact of standardized communication  
6 techniques on errors during simulated neonatal resuscitation. *AM J Perinatol*  
7  
8 2016;33:385–92.  
9  
10  
11  
12  
13  
14  
15  
16  
17  
18  
19  
20  
21  
22  
23  
24  
25  
26  
27  
28  
29  
30  
31  
32  
33  
34  
35  
36  
37  
38  
39  
40  
41  
42  
43  
44  
45  
46  
47  
48  
49  
50  
51  
52  
53  
54  
55  
56  
57  
58  
59  
60



Table 1. Descriptions of study objectives, settings and description of teamwork process and outcome measures

| Authors                                     | Year | Main study objectives                                                                                                            | Participants and setting                                                                                                                                                | Teamwork process measure                                                                                                        | Outcome measure                                                              |
|---------------------------------------------|------|----------------------------------------------------------------------------------------------------------------------------------|-------------------------------------------------------------------------------------------------------------------------------------------------------------------------|---------------------------------------------------------------------------------------------------------------------------------|------------------------------------------------------------------------------|
| Amacher, Schumacher, Legeret, et al.[77]    | 2017 | To compare female and male rescuers in regard to cardiopulmonary resuscitation and leadership performance                        | Video observation of medical students managing cardiopulmonary resuscitation in a high-fidelity patient simulator                                                       | Structured observation of secure leadership statements within teams                                                             | Time until start chest compression<br>Hands-on time within first 180 seconds |
| Brogaard, Kierkegaard, Hvidmand, et al.[60] | 2018 | To investigate the relationship between non-technical skills and clinical performance in obstetric teams                         | Video observation of obstetric teams (Obstetricians, obstetric nurse, anaesthesiologists) managing real-life emergencies (postpartum haemorrhage)                       | Assessment of non-technical skills using a behaviourally anchored rating scale (ATOP; Assessment of Obstetric Team Performance) | Checklist tool for clinical performance (TeamOBS-PPH)                        |
| Burtscher, Kolbe, Wacker, et al.[78]        | 2011 | To investigate how team mental models and team monitoring behaviour interact to predict team performance in anaesthesia          | Video observation of anaesthesia teams (residents, nurses) conducting a standard anaesthesia induction using a high-fidelity patient simulator                          | Structured observation of team monitoring behaviour                                                                             | Checklist based expert rating                                                |
| Burtscher, Manser, Kolbe, et al.[79]        | 2011 | To investigate the relationship between adaptation of team coordination and clinical performance in response to a critical event | Video observation of anaesthesia teams (resident, nurse) conducting a standard anaesthesia induction including a critical event using a high-fidelity patient simulator | Structured observation of team coordination                                                                                     | Reaction time related to the critical event                                  |
| Burtscher, Wacker, Grote, et al.[80]        | 2010 | To examine the role of anaesthesia teams' adaptive coordination in managing changing situational demands                         | Video observation of anaesthesia teams (residents, nurses, students) conducting standard anaesthesia inductions with non-routine events                                 | Structured observation of team coordination                                                                                     | Checklist based expert rating                                                |

|    |                      |      |                                |                                  |                          |                     |
|----|----------------------|------|--------------------------------|----------------------------------|--------------------------|---------------------|
| 1  |                      |      |                                |                                  |                          |                     |
| 2  |                      |      |                                |                                  |                          |                     |
| 3  | Carlson, Min,        | 2009 | To explore the relationship    | Video observation of trainees    | Assessment of team       | Checklist based     |
| 4  | Bridges[9]           |      | between team behaviour and     | participating in a simulated     | behaviour using a        | expert rating       |
| 5  |                      |      | the delivery of an appropriate | event involving the presentation | behaviourally            |                     |
| 6  |                      |      | standard of care specific to   | of acute dyspnoea                | anchored rating scale    |                     |
| 7  |                      |      | the simulated case             |                                  | (leadership and team     |                     |
| 8  |                      |      |                                |                                  | behaviour                |                     |
| 9  |                      |      |                                |                                  | measurement tool)        |                     |
| 10 | Catchpole, Giddings, | 2007 | To investigate if effective    | Live observation of surgical     | Observation of non-      | Assessment of minor |
| 11 | Wilkinson, et        |      | teamwork can prevent the       | teams conducting paediatric      | technical skills using a | problems,           |
| 12 | al.[58]              |      | development of serious         | cardiac and orthopaedic          | behaviourally            | intraoperative      |
| 13 |                      |      | situations and provide         | surgeries                        | anchored rating scale    | performance and     |
| 14 |                      |      | evidence for improvements in   |                                  | (NOTECHS scoring         | duration of surgery |
| 15 |                      |      | training and systems           |                                  | system)                  |                     |
| 16 | Catchpole, Mishra,   | 2008 | To analyse the effects of      | Observation of surgical teams    | Observation of non-      | Operating time and  |
| 17 | Handa, et al.[59]    |      | surgical, aesthetic, and       | conducting laparoscopic          | technical skills using a | errors in surgical  |
| 18 |                      |      | nursing teamwork skills on     | cholecystectomies and carotid    | behaviourally            | technique           |
| 19 |                      |      | technical outcomes             | endarterectomies                 | anchored rating scale    |                     |
| 20 |                      |      |                                |                                  | (NOTECHS scoring         |                     |
| 21 |                      |      |                                |                                  | system)                  |                     |
| 22 | Cooper,              | 1999 | To examine the relationship    | Video observation of emergency   | Survey about leadership  | Checklist based     |
| 23 | Wakelam[81]          |      | between leadership behaviour,  | teams managing full              | behaviour using the      | expert rating       |
| 24 |                      |      | team dynamics and task         | cardiopulmonary arrests with a   | Leadership Behaviour     |                     |
| 25 |                      |      | performance                    | resuscitation attempt lasting    | Description              |                     |
| 26 |                      |      |                                | longer than 3 minutes            | Questionnaire            |                     |
| 27 | Davenport,           | 2007 | To measure the impact of       | Survey of staff on general and   | Survey about teamwork    | Surgical morbidity  |
| 28 | Henderson,           |      | organizational climate safety  | vascular surgery services        | climate, level of        | Surgical mortality  |
| 29 | Mosca, et al.[82]    |      | factors on risk-adjusted       |                                  | communication and        |                     |
| 30 |                      |      | surgical morbidity and         |                                  | collaboration with       |                     |
| 31 |                      |      | mortality                      |                                  | surgeon                  |                     |
| 32 | El Bardissi,         | 2008 | To identify patterns of        | Live observation of surgical     | Structured observation   | Surgical technical  |
| 33 | Wiegmann,            |      | teamwork failures that would   | teams conducting cardiac         | of teamwork failures     | errors              |
| 34 | Henrickson, et       |      | benefit from intervention in   | surgery                          | that disrupted the flow  |                     |
| 35 | al.[83]              |      | the cardiac surgical setting   |                                  | of the operation         |                     |
| 36 |                      |      |                                |                                  |                          |                     |
| 37 | Gillespie, Chaboyer, | 2012 | To investigate how various     | Live observation of surgical     | Structured observation   | Deviation from      |
| 38 | Fairweather[84]      |      | human factors variables,       | teams across 10 specialties      | of numbers of            | expected length of  |
| 39 |                      |      | extend the expected length of  |                                  | communication            | operation           |
| 40 |                      |      | an operation                   |                                  | failures                 |                     |
| 41 |                      |      |                                |                                  |                          |                     |
| 42 |                      |      |                                |                                  |                          |                     |
| 43 |                      |      |                                |                                  |                          |                     |
| 44 |                      |      |                                |                                  |                          |                     |
| 45 |                      |      |                                |                                  |                          |                     |
| 46 |                      |      |                                |                                  |                          |                     |
| 47 |                      |      |                                |                                  |                          |                     |

|    |                     |      |                                  |                                    |                         |                       |
|----|---------------------|------|----------------------------------|------------------------------------|-------------------------|-----------------------|
| 1  |                     |      |                                  |                                    |                         |                       |
| 2  |                     |      |                                  |                                    |                         |                       |
| 3  | Kolbe, Burtscher,   | 2012 | To test the relationship between | Observation of 2-person (nurse,    | Structured observation  | Checklist based       |
| 4  | Wacker, et al.[85]  |      | speaking up and technical        | resident) ad hoc anaesthesia       | of speaking up          | expert rating         |
| 5  |                     |      | team performance in              | teams performing simulated         | behaviour               |                       |
| 6  |                     |      | anaesthesia.                     | inductions of general              |                         |                       |
| 7  |                     |      |                                  | anaesthesia with minor             |                         |                       |
| 8  |                     |      |                                  | nonroutine events                  |                         |                       |
| 9  | Kuenzle, Zala-Mezo, | 2009 | To investigate shared leadership | Observation of 2-person (nurse,    | Structured observation  | Reaction time to      |
| 10 | Wacker, et al.[86]  |      | patterns during anaesthesia      | resident) ad hoc anaesthesia       | of leadership           | nonroutine event      |
| 11 |                     |      | induction and to show how        | teams performing simulated         | behaviour               |                       |
| 12 |                     |      | they are linked to team          | inductions of general              |                         |                       |
| 13 |                     |      | performance                      | anaesthesia with a nonroutine      |                         |                       |
| 14 |                     |      |                                  | event (asystole)                   |                         |                       |
| 15 | Manojilovich,       | 2009 | To determine the relationships   | A survey was conducted with        | Survey about perception | Ventilator-associated |
| 16 | Antonakos, David,   |      | between patients' outcomes       | nurses on various ICU wards        | of nurse-physician      | pneumonia             |
| 17 | et al.[87]          |      | and nurses' perceptions of       |                                    | communication using     | Bloodstream           |
| 18 |                     |      | communication and                |                                    | the ICU-nurse           | infections            |
| 19 |                     |      | characteristics of the practice  |                                    | physician               | Pressure ulcers       |
| 20 |                     |      | environment.                     |                                    | questionnaire           | Acute physiology and  |
| 21 |                     |      |                                  |                                    |                         | chronic health        |
| 22 |                     |      |                                  |                                    |                         | evaluation score      |
| 23 | Manser, Bogdanovic, | 2015 | To investigate surgeons team     | Live observation of surgical       | Structured observation  | Checklist based       |
| 24 | Clack, et al. [61]  |      | management skills and its        | teams managing a simulated         | of team management      | expert rating         |
| 25 |                     |      | influence on performance         | laparoscopic cholecystectomy       | using the ComEd-E       |                       |
| 26 |                     |      |                                  |                                    | observation system      |                       |
| 27 | Marsch, Müller,     | 2004 | To determine whether and how     | Observation of healthcare worker   | Structured observation  | Checklist based       |
| 28 | Marquardt, et       |      | human factors affect the         | (nurse, physician) managing a      | of task distribution,   | expert rating         |
| 29 | al.[88]             |      | quality of cardiopulmonary       | cardiac arrest due to ventricular  | information transfer    |                       |
| 30 |                     |      | resuscitation                    | fibrillation using a high-fidelity | and leadership          |                       |
| 31 |                     |      |                                  | patient simulator                  | behaviour within the    |                       |
| 32 |                     |      |                                  |                                    | team                    |                       |
| 33 | Mazzocco, Petitti,  | 2009 | To determine if patients of      | Live observation of surgical       | Structured observation  | Postoperative         |
| 34 | Fong, et al.[89]    |      | teams with good teamwork         | teams managing a variety of        | of information sharing, | complications and     |
| 35 |                     |      | had better outcomes than         | surgical procedures                | inquiry for relevant    | death                 |
| 36 |                     |      | those with poor teamwork         |                                    | information and         |                       |
| 37 |                     |      |                                  |                                    | vigilance and           |                       |
| 38 |                     |      |                                  |                                    | awareness using a       |                       |
| 39 |                     |      |                                  |                                    | behaviourally           |                       |
| 40 |                     |      |                                  |                                    | anchored rating scale   |                       |
| 41 |                     |      |                                  |                                    |                         |                       |
| 42 |                     |      |                                  |                                    |                         |                       |
| 43 |                     |      |                                  |                                    |                         |                       |
| 44 |                     |      |                                  |                                    |                         |                       |
| 45 |                     |      |                                  |                                    |                         |                       |
| 46 |                     |      |                                  |                                    |                         |                       |
| 47 |                     |      |                                  |                                    |                         |                       |

|    |                      |      |                                 |                                   |                          |                      |
|----|----------------------|------|---------------------------------|-----------------------------------|--------------------------|----------------------|
| 1  |                      |      |                                 |                                   |                          |                      |
| 2  |                      |      |                                 |                                   |                          |                      |
| 3  | Mishra, Catchpole,   | 2008 | To report on the development    | Live observation of surgical      | Assessment of non-       | Surgical technical   |
| 4  | Dale, et al.[90]     |      | and evaluation of a method      | teams conducting laparoscopic     | technical skills using a | errors assessed      |
| 5  |                      |      | for measuring operating-        | cholecystectomy                   | behaviourally            | with the OCHRA-      |
| 6  |                      |      | theatre teamwork quality        |                                   | anchored rating scale    | tool                 |
| 7  |                      |      |                                 |                                   | (NOTECHS scoring         |                      |
| 8  |                      |      |                                 |                                   | system)                  |                      |
| 9  | Schmutz, Hoffmann,   | 2015 | To investigate the moderating   | Video observation of paediatric   | Structured observation   | Checklist based      |
| 10 | Heimberg, et         |      | effect of task characteristics  | teams managing various            | of closed loop           | expert rating        |
| 11 | al.[91]              |      | on the relationship between     | paediatric emergencies using a    | communication, task      |                      |
| 12 |                      |      | coordination and performance    | high-fidelity patient simulator   | distribution and         |                      |
| 13 |                      |      |                                 |                                   | provide information      |                      |
| 14 |                      |      |                                 |                                   | without request using    |                      |
| 15 |                      |      |                                 |                                   | the CoMeT-E              |                      |
| 16 |                      |      |                                 |                                   | observation system       |                      |
| 17 | Siassakos, Bristowe, | 2012 | To investigate the relationship | Video observation of teams        | Structured observation   | Timely               |
| 18 | Draycott, et al.[92] |      | between patient satisfaction    | (physicians, midwives)            | of closed loop           | administration of    |
| 19 |                      |      | and communication               | managing obstetric emergencies    | communication            | magnesium            |
| 20 |                      |      |                                 | in secondary and tertiary         |                          | sulphate             |
| 21 |                      |      |                                 | maternity units                   |                          |                      |
| 22 | Siassakos, Fox,      | 2011 | To determine whether team       | Video observation of healthcare   | Assessment of generic    | Clinical efficiency  |
| 23 | Crofts, et al.[93]   |      | performance in a simulated      | professionals (physician,         | teamwork using a         | score                |
| 24 |                      |      | emergency is related to         | midwives) managing various        | behaviourally            |                      |
| 25 |                      |      | generic teamwork skills and     | emergencies using a high-         | anchored rating scale    |                      |
| 26 |                      |      | behaviors                       | fidelity patient simulator        | (teamwork analytical     |                      |
| 27 |                      |      |                                 |                                   | tool)                    |                      |
| 28 | Thomas, Sexton,      | 2006 | To investigate the relationship | Video observation of neonatal     | Structured observation   | Compliance with      |
| 29 | Lasky, et al.[94]    |      | of team behaviours during       | care teams managing a             | of communication,        | Neonatal             |
| 30 |                      |      | delivery room care and          | resuscitation during a caesarean  | team management and      | Resuscitation        |
| 31 |                      |      | behaviours relate to the        | section                           | leadership               | Program guidelines   |
| 32 |                      |      | quality of care                 |                                   |                          |                      |
| 33 | Tschan, Semmer,      | 2006 | To investigate the influence of | Video observation of medical      | Structured observation   | Clinical performance |
| 34 | Gautschi, et al.[95] |      | human factors on team           | emergency teams (senior doctor,   | of directive leadership  | assessed based on a  |
| 35 |                      |      | performance in medical          | resident, nurse) managing a       | and structuring inquiry  | time-based coding    |
| 36 |                      |      | emergency driven groups         | cardiac arrest in a high-fidelity |                          | of observable        |
| 37 |                      |      |                                 | patient simulator                 |                          | technical acts       |
| 38 |                      |      |                                 |                                   |                          |                      |
| 39 |                      |      |                                 |                                   |                          |                      |
| 40 |                      |      |                                 |                                   |                          |                      |
| 41 |                      |      |                                 |                                   |                          |                      |
| 42 |                      |      |                                 |                                   |                          |                      |
| 43 |                      |      |                                 |                                   |                          |                      |
| 44 |                      |      |                                 |                                   |                          |                      |
| 45 |                      |      |                                 |                                   |                          |                      |
| 46 |                      |      |                                 |                                   |                          |                      |
| 47 |                      |      |                                 |                                   |                          |                      |

|    |                       |      |                                 |                                   |                          |                   |
|----|-----------------------|------|---------------------------------|-----------------------------------|--------------------------|-------------------|
| 1  |                       |      |                                 |                                   |                          |                   |
| 2  |                       |      |                                 |                                   |                          |                   |
| 3  | Tschan, Semmer,       | 2009 | To investigate the influence of | Video observation of groups of    | Structured observation   | Accuracy of       |
| 4  | Gurtner, et al.[96]   |      | communication on diagnostic     | physicians diagnosing a difficult | of the diagnostic        | diagnosis         |
| 5  |                       |      | accuracy in ambiguous           | patient with an anaphylactic      | information that have    |                   |
| 6  |                       |      | situations                      | shock in a high-fidelity patient  | been considered,         |                   |
| 7  |                       |      |                                 | simulator                         | explicit reasoning and   |                   |
| 8  |                       |      |                                 |                                   | talking to the room      |                   |
| 9  |                       |      |                                 |                                   |                          |                   |
| 10 | Westli, Johnsen, Eid, | 2010 | To investigate whether          | Video observation of trauma       | Assessment of non-       | Checklist based   |
| 11 | et al.[97]            |      | demonstrated teamwork skills    | teams (surgeons,                  | technical skills using a | expert rating     |
| 12 |                       |      | and behaviour indicating        | anaesthesiologists, nurses,       | behaviourally            |                   |
| 13 |                       |      | shared mental models would      | radiographers) in a high-fidelity | anchored rating scale    |                   |
| 14 |                       |      | be associated with improved     | patient simulator                 | (ANTS and ATOM           |                   |
| 15 |                       |      | medical management              |                                   | scoring system)          |                   |
| 16 | Wiegmann, El          | 2007 | To investigate surgical errors  | Live observation of surgical      | Structured observation   | Structured        |
| 17 | Bardissi, Dearani,    |      | and their relationship to       | teams conducting cardiac          | of teamwork and          | observation of    |
| 18 | et al.[98]            |      | surgical flow disruptions to    | surgery operations                | communication            | surgical errors   |
| 19 |                       |      | understand better the effect of |                                   | failures                 | during the        |
| 20 |                       |      | these disruptions on surgical   |                                   |                          | operation         |
| 21 |                       |      | errors and patient safety       |                                   |                          |                   |
| 22 | Williams, Lasky,      | 2010 | To describe relationships       | Video observation of intensive    | Structured observation   | Structured        |
| 23 | Dannemiller, et       |      | between teamwork                | care teams managing neonatal      | of teamwork behaviour    | observation of    |
| 24 | al.[99]               |      | behaviours and errors during    | resuscitations                    | (vigilance, workload     | errors (non-      |
| 25 |                       |      | neonatal resuscitation          |                                   | management,              | compliance with   |
| 26 |                       |      |                                 |                                   | information sharing,     | guidelines)       |
| 27 |                       |      |                                 |                                   | inquiry, assertion)      |                   |
| 28 | Wright, Phillips-     | 2009 | To test if observer ratings of  | Video observation of teams        | Observation using a      | Checklist based   |
| 29 | Bute, Petrusa, et     |      | team skills will correlate with | consisting of medical students    | behaviourally            | expert rating     |
| 30 | al.[100]              |      | objective measures of clinical  | performing low-fidelity           | anchored rating scale    |                   |
| 31 |                       |      | performance                     | classroom based patient           | for teamwork skills      |                   |
| 32 |                       |      |                                 | assessment and high-fidelity      | (assertiveness,          |                   |
| 33 |                       |      |                                 | simulation emergent care.         | decision-making,         |                   |
| 34 |                       |      |                                 |                                   | situation assessment,    |                   |
| 35 |                       |      |                                 |                                   | leadership,              |                   |
| 36 | Yamada, Fuerch,       | 2016 | To investigate the effect of    | Video observation of teams        | Structured observation   | Error rate        |
| 37 | Halamek[101]          |      | standardized communication      | (Neonatologists, neonatal nurse   | of standardised          | Time to initiate  |
| 38 |                       |      | techniques on errors during     | practitioners, neonatology        | communication            | positive pressure |
| 39 |                       |      | resuscitation                   | fellows) managing neonatal        |                          | ventilation       |
| 40 |                       |      |                                 | resuscitation                     |                          | Time to chest     |
| 41 |                       |      |                                 |                                   |                          | compression       |
| 42 |                       |      |                                 |                                   |                          |                   |
| 43 |                       |      |                                 |                                   |                          |                   |
| 44 |                       |      |                                 |                                   |                          |                   |
| 45 |                       |      |                                 |                                   |                          |                   |
| 46 |                       |      |                                 |                                   |                          |                   |
| 47 |                       |      |                                 |                                   |                          |                   |

Table 2. Studies, effect sizes and moderator variables included in the meta-analytic database

| Authors                                       | Year | Study goal       | Setting            | No. of teams | Professional composition | Team familiarity | Average team size | Task type             | Patient realism | Performance measure |
|-----------------------------------------------|------|------------------|--------------------|--------------|--------------------------|------------------|-------------------|-----------------------|-----------------|---------------------|
| Amacher, Schumacher, Legeret, et al.[77]      | 2017 | .11              | Emergency medicine | 72           | Uniprofessional          | Experimental     | 3                 | Non-routine           | Simulated       | Process             |
| Brogaard, Kierkegaard, Hvidmand, et al.[60]   | 2018 | .43              | Obstetrics         | 99           | Interprofessional        | Real             | 5                 | Non-routine           | Real            | Process             |
| Burtscher, Kolbe, Wacker, et al.[78]          | 2011 | -.27             | Anaesthesia        | 31           | Interprofessional        | Experimental     | 2                 | Routine               | Simulated       | Process             |
| Burtscher, Manser, Kolbe, et al.[79]          | 2011 | .19              | Anaesthesia        | 15           | Interprofessional        | Experimental     | 2                 | Routine & non-routine | Simulated       | Process             |
| Burtscher, Wacker, Grote, et al.[80]          | 2010 | .07              | Anaesthesia        | 22           | Interprofessional        | Real             | 3                 | Non-routine           | Real            | Process             |
| Carlson, Min, Bridges[9] <sup>b</sup>         | 2009 | .83              | Emergency medicine | 44           | Uniprofessional          | Experimental     | 2.6               | Non-routine           | Simulated       | Process             |
| Catchpole, Giddings, Wilkinson, et al.[58]    | 2007 | .45 <sup>†</sup> | Surgery            | 24           | Interprofessional        | Real             | 9                 | Non-routine           | Real            | Process             |
|                                               | 2007 | .29 <sup>†</sup> | Surgery            | 18           | Interprofessional        | Real             | 5                 | Routine               | Real            | Process             |
| Catchpole, Mishra, Handa, et al.[59]          | 2008 | .36 <sup>†</sup> | Surgery            | 26           | Interprofessional        | Real             |                   | Routine               | Real            | Process             |
|                                               | 2008 | .09 <sup>†</sup> | Surgery            | 22           | Interprofessional        | Real             |                   | Routine               | Real            | Process             |
| Cooper, Wakelam[81]                           | 1999 | .50              | General care       | 20           | Interprofessional        | Real             | 4                 | Routine               | Real            | Process             |
| Davenport, Henderson, Mosca, et al.[82]       | 2007 | .17              | Surgery            | 52           | Interprofessional        | Real             |                   | Routine               | Real            | Outcome             |
| El Bardissi, Wiegmann, Henrickson, et al.[83] | 2008 | .67              | Surgery            | 31           | Interprofessional        | Real             | 7                 | Routine               | Real            | Process             |
| Gillespie, Chaboyer, Fairweather[84]          | 2012 | .23              | Surgery            | 160          | Interprofessional        | Real             | 6                 | Routine               | Real            | Process             |
| Kolbe, Burtscher, Wacker, et al.[85]          | 2012 | .33              | Anaesthesia        | 31           | Interprofessional        | Real             | 2                 | Non-routine           | Simulated       | Process             |
| Kuenzle, Zala-Mezo, Wacker, et al.[86]        | 2009 | .56              | Anaesthesia        | 12           | Interprofessional        | Real             | 2                 | Routine               | Simulated       | Process             |
| Manojilovich, Antonakos, David, et al.[87]    | 2009 | .11              | Intensive care     | 25           | Uniprofessional          | Real             | 36                | Routine               | Real            | Outcome             |

|                                             |      |     |                               |     |                   |              |      |             |           |         |
|---------------------------------------------|------|-----|-------------------------------|-----|-------------------|--------------|------|-------------|-----------|---------|
| Manser, Bogdanovic, Clack, et al.[61]       | 2015 | .39 | Surgery                       | 19  | Interprofessional | Experimental | 5    | Routine     | Simulated | Process |
| Marsch, Müller, Marquardt, et al.[88]       | 2004 | .23 | Intensive care                | 16  | Interprofessional | Experimental | 3    | Non-routine | Simulated | Process |
| Mazzocco, Petitti, Fong, et al.[89]         | 2009 | .11 | Surgery                       | 293 | Interprofessional | Real         | 6    | Routine     | Real      | Outcome |
| Mishra, Catchpole, Dale, et al.[90]         | 2008 | .05 | Surgery                       | 26  | Interprofessional | Real         | 6    | Routine     | Real      | Process |
| Schmutz, Hoffmann, Heimberg, et al.[91]     | 2015 | .12 | Emergency medicine            | 68  | Interprofessional | Real         | 6    | Non-routine | Simulated | Process |
| Siassakos, Bristowe, Draycott, et al.[92]   | 2012 | .66 | Obstetrics                    | 19  | Interprofessional | Real         | 6    | Non-routine | Simulated | Process |
| Siassakos, Fox, Crofts, et al.[93]          | 2011 | .55 | Emergency medicine/obstetrics | 24  | Interprofessional | Experimental | 6    | Non-routine | Simulated | Process |
| Thomas, Sexton, Lasky, et al.[94]           | 2006 | .23 | Neonatal care                 | 132 | Interprofessional | Real         | 5    | Non-routine | Real      | Process |
| Tschan, Semmer, Gautschi, et al.[95]        | 2006 | .23 | Emergency medicine            | 21  | Interprofessional | Experimental | 5    | Non-routine | Simulated | Process |
| Tschan, Semmer, Gurtner, et al.[96]         | 2009 | .37 | Emergency medicine            | 20  | Uniprofessional   | Experimental | 2.65 | Non-routine | Simulated | Outcome |
| Westli, Johnsen, Eid, et al.[97]            | 2010 | .18 | Emergency medicine            | 27  | Interprofessional | Real         | 5.1  | Non-routine | Simulated | Process |
| Wiegmann, El Bardissi, Dearani, et al.[98]  | 2007 | .56 | Surgery                       | 31  | Interprofessional | Real         |      | Routine     | Real      | Process |
| Williams, Lasky, Dannemiller, et al.[99]    | 2010 | .18 | Neonatal care                 | 12  | Interprofessional | Real         | 5    | Non-routine | Real      | Process |
| Wright, Phillips-Bute, Petrusa, et al.[100] | 2009 | .81 | General care                  | 9   | Uniprofessional   | Experimental | 4    | Non-routine | Simulated | Process |
| Yamada, Fuerch, Halamek[101]                | 2016 | .11 | Emergency medicine            | 13  | Interprofessional | Experimental | 3    | Non-routine | Simulated | Process |

<sup>a</sup> Effect sizes ( $r$ ) with an † represent an average for a single sample and a single outcome and have been combined for this meta-analysis.

<sup>b</sup> Carlson, Min & Bridges has been identified as an outlier and therefore excluded from the analysis

Table 3. Meta-Analytic relationships between teamwork and clinical performance

|                                 | N     | k  | r   | 95% CI       | 80% CR       | Q     | I <sup>2</sup> |
|---------------------------------|-------|----|-----|--------------|--------------|-------|----------------|
| Overall relationship            | 1,390 | 31 | .28 | [.20 ; .35]  | [.09 ; .45]  | 53.7  | 46.0           |
| <i>Team characteristics</i>     |       |    |     |              |              |       |                |
| <i>Professional composition</i> |       |    |     |              |              |       |                |
| Interprofessional               | 1,264 | 27 | .28 | [.20 ; .36]  | [.09 ; .46]  | 47.1* | 48.2           |
| Uniprofessional                 | 126   | 4  | .28 | [-.01 ; .52] | [-.04 ; .54] | 6.5   | 47.1           |
| <i>Team familiarity</i>         |       |    |     |              |              |       |                |
| Experimental team               | 240   | 10 | .25 | [.05 ; .43]  | [-.05 ; .51] | 17.2* | 47.2           |
| Real team                       | 1,150 | 21 | .29 | [.20 ; .37]  | [.12 ; .45]  | 36.2* | 45.7           |
| Team size <sup>a</sup>          |       |    |     |              |              |       |                |
| <i>Task characteristics</i>     |       |    |     |              |              |       |                |
| <i>Task type</i>                |       |    |     |              |              |       |                |
| Routine task                    | 766   | 14 | .27 | [.12 ; .40]  | [-.01 ; .50] | 30.9* | 65.0           |
| Non-routine task                | 609   | 16 | .29 | [.20 ; .39]  | [.16 ; .42]  | 20.5  | 24.6           |
| <i>Methodological factors</i>   |       |    |     |              |              |       |                |
| <i>Patient realism</i>          |       |    |     |              |              |       |                |
| Real patient                    | 993   | 16 | .28 | [.18 ; .38]  | [.10 ; .45]  | 28.7* | 49.3           |
| Simulated patient               | 397   | 15 | .28 | [.13 ; .41]  | [.02 ; .50]  | 25.0* | 44.6           |
| <i>Performance measures</i>     |       |    |     |              |              |       |                |
| Outcome performance             | 390   | 4  | .13 | [.03 ; .23]  | [.06 ; .19]  | 1.3   | 0.0            |
| Process performance             | 1,000 | 27 | .30 | [.21 ; .39]  | [.10 ; .49]  | 45.6* | 45.6           |

Note. *k* = number of studies; *N* = cumulative sample size (number of teams); *r* = sample-size weighted correlation; CI = confidence interval; CR = credibility interval; *Q* = test statistic for residual heterogeneity of the models; *I*<sup>2</sup> = % of total variability in the effect size estimates due to heterogeneity among true effects (vs. sampling error)

<sup>a</sup> Team size was entered as a continuous variable, therefore, no subgroup analyses exist



1  
2  
3 **LEGENDS TO FIGURES**  
4

5 **Figure 1** Systematic literature search  
6

7  
8 **Figure 2** Relationship between teamwork processes and performance  
9

10  
11  
12  
13  
14  
15  
16  
17  
18  
19  
20  
21  
22  
23  
24  
25  
26  
27  
28  
29  
30  
31  
32  
33  
34  
35  
36  
37  
38  
39  
40  
41  
42  
43  
44  
45  
46  
47  
48  
49  
50  
51  
52  
53  
54  
55  
56  
57  
58  
59  
60

For peer review only

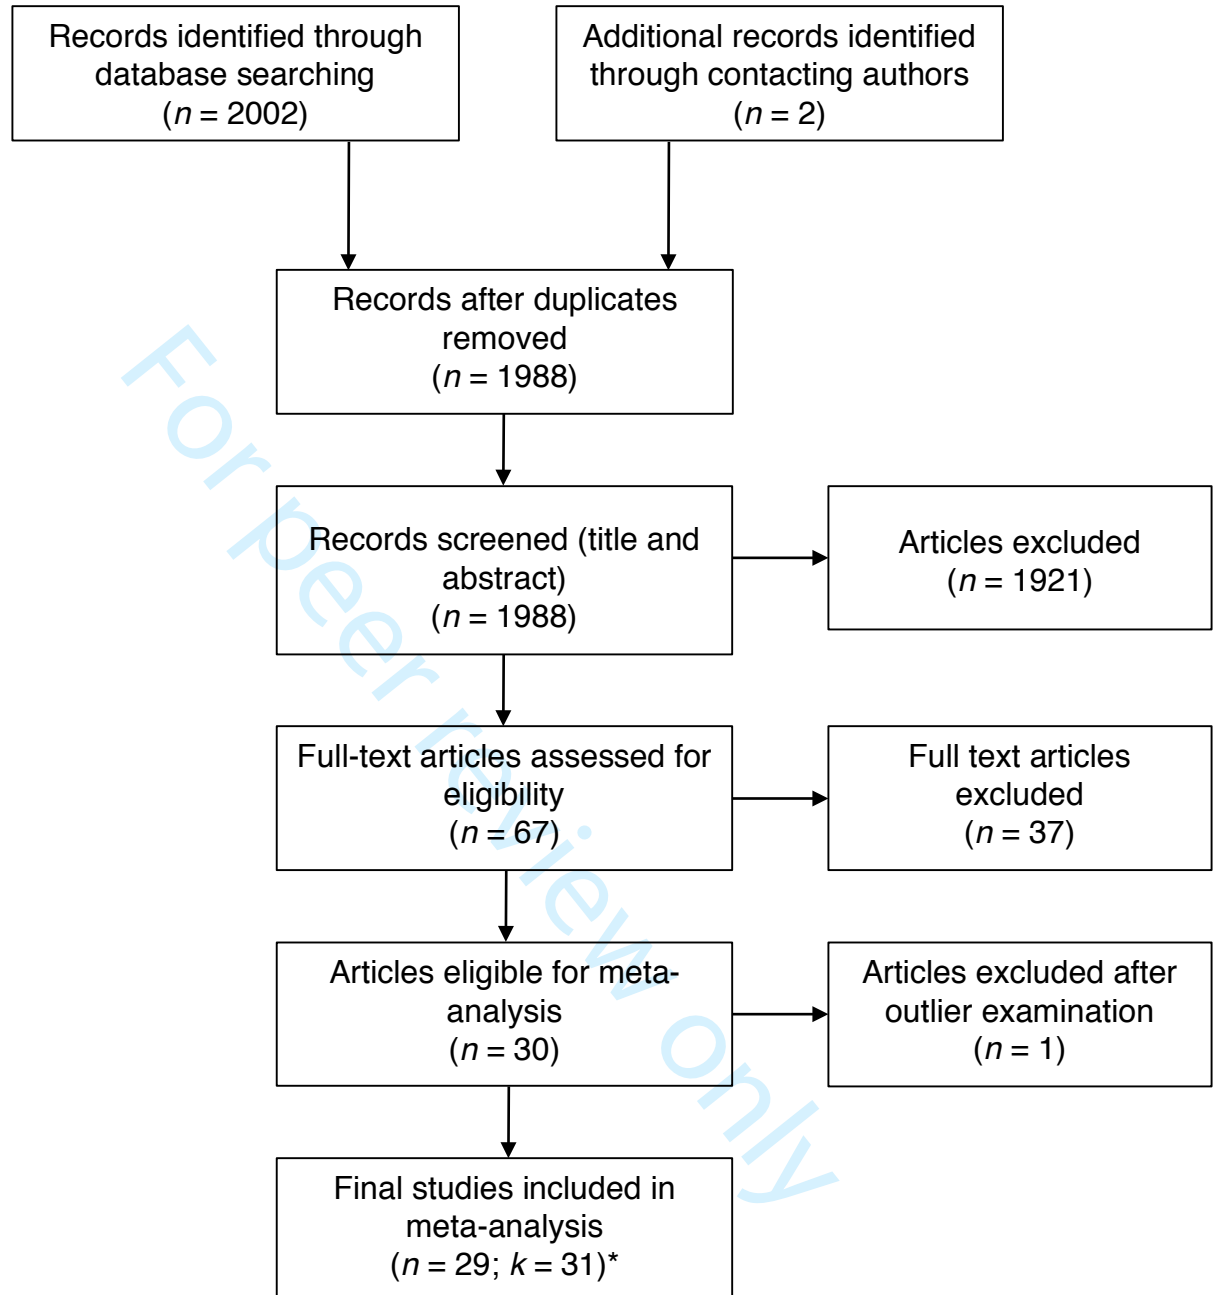

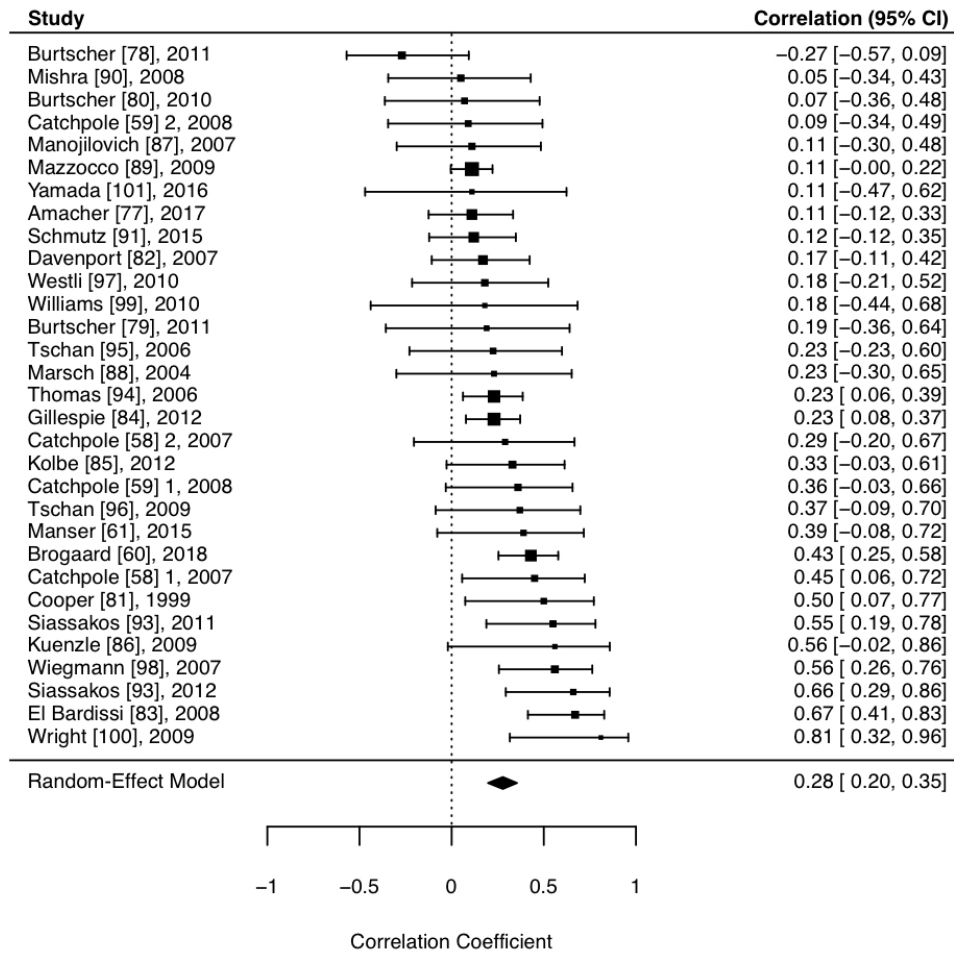

Figure 2. Relationship between teamwork processes and performance.

**SUPPLEMENTARY FILE**

Article: **How effective is teamwork really? The relationship between teamwork and performance in healthcare teams: A systematic review and meta-analysis**

Jan B. Schmutz, PhD· Laurenz L. Meier, PhD· Tanja Manser, PhD

**Search terms used for PubMed search**

(Teamwork[All Fields]) OR (team[All Fields] AND coordination[All Fields]) OR (team[All Fields] AND "decision making"[All Fields]) OR ((team[All Fields]) AND (communication[MeSH Terms]) OR (communication[All Fields])) OR (team[All Fields] AND leadership[All Fields]) AND (patient safety[MeSH Terms])



# PRISMA 2009 Checklist

1  
2  
3  
4  
5  
6  
7  
8  
9  
10  
11  
12  
13  
14  
15  
16  
17  
18  
19  
20  
21  
22  
23  
24  
25  
26  
27  
28  
29  
30  
31  
32  
33  
34  
35  
36  
37  
38  
39  
40  
41  
42  
43  
44  
45  
46  
47

| Section/topic                      | #  | Checklist item                                                                                                                                                                                                                                                                                              | Reported on page #          |
|------------------------------------|----|-------------------------------------------------------------------------------------------------------------------------------------------------------------------------------------------------------------------------------------------------------------------------------------------------------------|-----------------------------|
| <b>TITLE</b>                       |    |                                                                                                                                                                                                                                                                                                             |                             |
| Title                              | 1  | Identify the report as a systematic review, meta-analysis, or both.                                                                                                                                                                                                                                         | 1                           |
| <b>ABSTRACT</b>                    |    |                                                                                                                                                                                                                                                                                                             |                             |
| Structured summary                 | 2  | Provide a structured summary including, as applicable: background; objectives; data sources; study eligibility criteria, participants, and interventions; study appraisal and synthesis methods; results; limitations; conclusions and implications of key findings; systematic review registration number. | 2                           |
| <b>INTRODUCTION</b>                |    |                                                                                                                                                                                                                                                                                                             |                             |
| Rationale                          | 3  | Describe the rationale for the review in the context of what is already known.                                                                                                                                                                                                                              | 4-8                         |
| Objectives                         | 4  | Provide an explicit statement of questions being addressed with reference to participants, interventions, comparisons, outcomes, and study design (PICOS).                                                                                                                                                  | 4-5                         |
| <b>METHODS</b>                     |    |                                                                                                                                                                                                                                                                                                             |                             |
| Protocol and registration          | 5  | Indicate if a review protocol exists, if and where it can be accessed (e.g., Web address), and, if available, provide registration information including registration number.                                                                                                                               | n/a                         |
| Eligibility criteria               | 6  | Specify study characteristics (e.g., PICOS, length of follow-up) and report characteristics (e.g., years considered, language, publication status) used as criteria for eligibility, giving rationale.                                                                                                      | 9-10                        |
| Information sources                | 7  | Describe all information sources (e.g., databases with dates of coverage, contact with study authors to identify additional studies) in the search and date last searched.                                                                                                                                  | 9                           |
| Search                             | 8  | Present full electronic search strategy for at least one database, including any limits used, such that it could be repeated.                                                                                                                                                                               | 9 and supplemental material |
| Study selection                    | 9  | State the process for selecting studies (i.e., screening, eligibility, included in systematic review, and, if applicable, included in the meta-analysis).                                                                                                                                                   | 9-10                        |
| Data collection process            | 10 | Describe method of data extraction from reports (e.g., piloted forms, independently, in duplicate) and any processes for obtaining and confirming data from investigators.                                                                                                                                  | 10                          |
| Data items                         | 11 | List and define all variables for which data were sought (e.g., PICOS, funding sources) and any assumptions and simplifications made.                                                                                                                                                                       | 9-12                        |
| Risk of bias in individual studies | 12 | Describe methods used for assessing risk of bias of individual studies (including specification of whether this was done at the study or outcome level), and how this information is to be used in any data synthesis.                                                                                      | 20                          |
| Summary measures                   | 13 | State the principal summary measures (e.g., risk ratio, difference in means).                                                                                                                                                                                                                               | 13-19 / 23                  |



# PRISMA 2009 Checklist

|                      |    |                                                                                                                                                           |       |
|----------------------|----|-----------------------------------------------------------------------------------------------------------------------------------------------------------|-------|
| Synthesis of results | 14 | Describe the methods of handling data and combining results of studies, if done, including measures of consistency (e.g., $I^2$ ) for each meta-analysis. | 20-23 |
|----------------------|----|-----------------------------------------------------------------------------------------------------------------------------------------------------------|-------|

Page 1 of 2

| Section/topic                 | #  | Checklist item                                                                                                                                                                                           | Reported on page # |
|-------------------------------|----|----------------------------------------------------------------------------------------------------------------------------------------------------------------------------------------------------------|--------------------|
| Risk of bias across studies   | 15 | Specify any assessment of risk of bias that may affect the cumulative evidence (e.g., publication bias, selective reporting within studies).                                                             | 20,26              |
| Additional analyses           | 16 | Describe methods of additional analyses (e.g., sensitivity or subgroup analyses, meta-regression), if done, indicating which were pre-specified.                                                         | 22-23              |
| <b>RESULTS</b>                |    |                                                                                                                                                                                                          |                    |
| Study selection               | 17 | Give numbers of studies screened, assessed for eligibility, and included in the review, with reasons for exclusions at each stage, ideally with a flow diagram.                                          | 21                 |
| Study characteristics         | 18 | For each study, present characteristics for which data were extracted (e.g., study size, PICOS, follow-up period) and provide the citations.                                                             | 18-19              |
| Risk of bias within studies   | 19 | Present data on risk of bias of each study and, if available, any outcome level assessment (see item 12).                                                                                                | 18-19, 20          |
| Results of individual studies | 20 | For all outcomes considered (benefits or harms), present, for each study: (a) simple summary data for each intervention group (b) effect estimates and confidence intervals, ideally with a forest plot. | 13-19              |
| Synthesis of results          | 21 | Present results of each meta-analysis done, including confidence intervals and measures of consistency.                                                                                                  | 23                 |
| Risk of bias across studies   | 22 | Present results of any assessment of risk of bias across studies (see Item 15).                                                                                                                          | 23                 |
| Additional analysis           | 23 | Give results of additional analyses, if done (e.g., sensitivity or subgroup analyses, meta-regression [see Item 16]).                                                                                    | N/A                |
| <b>DISCUSSION</b>             |    |                                                                                                                                                                                                          |                    |
| Summary of evidence           | 24 | Summarize the main findings including the strength of evidence for each main outcome; consider their relevance to key groups (e.g., healthcare providers, users, and policy makers).                     | 24-27              |
| Limitations                   | 25 | Discuss limitations at study and outcome level (e.g., risk of bias), and at review-level (e.g., incomplete retrieval of identified research, reporting bias).                                            | 26-27              |
| Conclusions                   | 26 | Provide a general interpretation of the results in the context of other evidence, and implications for future research.                                                                                  | 27                 |
| <b>FUNDING</b>                |    |                                                                                                                                                                                                          |                    |
| Funding                       | 27 | Describe sources of funding for the systematic review and other support (e.g., supply of data); role of funders for the systematic review.                                                               | 28                 |

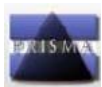

# PRISMA 2009 Checklist

1  
2  
3  
4  
5  
6  
7  
8  
9  
10  
11  
12  
13  
14  
15  
16  
17  
18  
19  
20  
21  
22  
23  
24  
25  
26  
27  
28  
29  
30  
31  
32  
33  
34  
35  
36  
37  
38  
39  
40  
41  
42  
43  
44  
45  
46  
47

*From:* Moher D, Liberati A, Tetzlaff J, Altman DG, The PRISMA Group (2009). Preferred Reporting Items for Systematic Reviews and Meta-Analyses: The PRISMA Statement. PLoS Med 6(6): e1000097. doi:10.1371/journal.pmed1000097

For more information, visit: [www.prisma-statement.org](http://www.prisma-statement.org).

Page 2 of 2

For peer review only

# BMJ Open

## How effective is teamwork really? The relationship between teamwork and performance in healthcare teams: A systematic review and meta-analysis

|                                 |                                                                                                                                                                                                                                                          |
|---------------------------------|----------------------------------------------------------------------------------------------------------------------------------------------------------------------------------------------------------------------------------------------------------|
| Journal:                        | <i>BMJ Open</i>                                                                                                                                                                                                                                          |
| Manuscript ID                   | bmjopen-2018-028280.R2                                                                                                                                                                                                                                   |
| Article Type:                   | Research                                                                                                                                                                                                                                                 |
| Date Submitted by the Author:   | 23-Jun-2019                                                                                                                                                                                                                                              |
| Complete List of Authors:       | Schmutz, Jan B.; Northwestern University, Department of Communication Studies<br>Meier, Laurenz ; University of Neuchâtel , Occupational Psychology and Organizations<br>Manser, Tanja; University of Applied Sciences and Arts Northwestern Switzerland |
| <b>Primary Subject Heading</b>: | Communication                                                                                                                                                                                                                                            |
| Secondary Subject Heading:      | Communication                                                                                                                                                                                                                                            |
| Keywords:                       | teamwork, non-technical skills, communication, meta-analysis, teams                                                                                                                                                                                      |
|                                 |                                                                                                                                                                                                                                                          |

SCHOLARONE™  
Manuscripts



1  
2  
3 **How effective is teamwork really? The relationship between teamwork and**  
4 **performance in healthcare teams: A systematic review and meta-analysis**  
5  
6  
7

8 **Jan B. Schmutz, PhD**  
9

10 Researcher at the Department of Communication Studies, Northwestern University, Evanston,  
11 USA  
12

13 Postdoctoral Researcher and Lecturer at the Department of Management, Technology, and  
14 Economics, ETH Zurich, Zurich, Switzerland  
15

16 jan.schmutz@northwestern.edu  
17  
18

19 **Laurenz L. Meier, PhD**  
20

21 Professor at the Institute of Work and Organizational Psychology, University of Neuchâtel,  
22 Neuchâtel, Switzerland  
23

24 laurenz.meier@unine.ch  
25  
26

27 **Tanja Manser, PhD**  
28

29 Director of the FHNW School of Applied Psychology, University of Applied Sciences and Arts  
30 Northwestern Switzerland, Olten, Switzerland  
31

32 tanja.manser@fhnw.ch  
33  
34

35 Word count: 4770  
36  
37

38 Keywords: teamwork, non-technical skills, communication, teams, meta-analysis  
39  
40  
41  
42

43 **Correspondence to**  
44

45 Jan B. Schmutz  
46 ATLAS Lab  
47 Department of Communication Studies  
48 Northwestern University  
49 Frances Searle Building 1.220  
50 2240 Campus Drive  
51 Evanston, IL 60208  
52 United States  
53 Phone 847-491-7023  
54 jan.schmutz@northwestern.edu  
55  
56  
57  
58  
59  
60

## ABSTRACT

**Objectives** To investigate the relationship between teamwork and clinical performance and potential moderating variables of this relationship.

**Design** Systematic review and meta-analysis.

**Data Source** PubMed was searched in June 2018 without a limit on the date of publication.

Additional literature was selected through a manual backward search of relevant reviews, manual backward and forward search of studies included in the meta-analysis and contacting of selected authors via e-mail.

**Eligibility Criteria** Studies were included if they reported a relationship between a teamwork process (e.g. coordination, non-technical skills) and a performance measure (e.g. checklist based expert rating, errors) in an acute care setting.

**Data Extraction and Synthesis** Moderator variables (i.e. professional composition, team familiarity, average team size, task type, patient realism and type of performance measure) were coded and random-effect models were estimated. Two investigators independently extracted information on study characteristics in accordance with PRISMA guidelines.

**Results** The review identified 2002 articles of which 31 were included in the meta-analysis comprising 1390 teams. The sample-sized weighted mean correlation was  $r = .28$  (corresponding to an odds ratio of 2.8), indicating that teamwork is positively related to performance. The test of moderators was not significant, suggesting that the examined factors did not influence the average effect of teamwork on performance.

**Conclusion** Teamwork has a medium-sized effect on performance. The analysis of moderators illustrated that teamwork relates to performance regardless of characteristics of the team or task.

1  
2  
3  
4  
5  
6  
7  
8  
9  
10  
11  
12  
13  
14  
15  
16  
17  
18  
19  
20  
21  
22  
23  
24  
25  
26  
27  
28  
29  
30  
31  
32  
33  
34  
35  
36  
37  
38  
39  
40  
41  
42  
43  
44  
45  
46  
47  
48  
49  
50  
51  
52  
53  
54  
55  
56  
57  
58  
59  
60

Therefore, healthcare organizations should recognize the value of teamwork and emphasize approaches that maintain and improve teamwork for the benefit of their patients.

For peer review only

## ARTICLE SUMMARY

### Strengths and limitations of this study

- This systematic review evaluates available studies investigating the effectiveness of teamwork processes.
- 31 studies have been included resulting in a substantial sample size of 1390 teams.
- The sample size of the primary studies included is usually low.
- For some subgroup analysis, the number of studies included was small.

## INTRODUCTION

May it be an emergency team in the trauma room, paramedics treating patients after an accident or a surgical team in the operating room, teams are ubiquitous in healthcare and must work across professional, disciplinary and sectorial boundaries. Although the clinical expertise of individual team members is important to ensure high performance, teams must be capable of applying and combining the unique expertise of team members to maintain safety and optimal performance. In order for a team to be effective individual team members need to collaborate and engage in teamwork. Today, experts agree that effective teamwork anchors safe and effective care at various levels of the healthcare systems[1-4] leading to a relatively recent shift towards team research and training.[5-7]

Healthcare is an evidence-based field and therefore administrators and providers are seeking evidence in the literature concerning the impact of teamwork on performance outcomes like patient mortality, morbidity, infection rates or adherence to clinical treatment guidelines. Having a closer look at the literature investigating healthcare teams we find mixed and sometimes even contradicting results about the relationship between teamwork and clinical performance.[8] Some studies find a large effect of teamwork on performance outcomes (e.g. Carlson et al.[9]) while others report small or no relationships.[10,11] This inconsistency arises due to several reasons. First, the conceptual and empirical literature examining teamwork is fragmented and research examining teamwork effectiveness is spread across disciplines including medicine, psychology and organization science. Therefore, researchers and practitioners often lack a common conceptual foundation for investigating teams and teamwork in healthcare. Second, research studies on teamwork in healthcare usually exhibit small sample sizes because of the challenges of recruiting actual professional teams and carefully balancing research with patient

1  
2  
3 care priorities. Small sample sizes, however, increase the likelihood of reporting results that fail  
4  
5 to represent true effect. Third, studies investigating healthcare teams often ignore important  
6  
7 context variables of teams (e.g. team composition and size, task characteristics, team  
8  
9 environment) that likely influence the effect that teamwork has on clinical performance.[12,13]  
10  
11

12 These inconsistencies in the teamwork literature may lead to confusion about the importance  
13  
14 of teamwork in healthcare, thus giving voice to critics who hinder efforts to improve teamwork.  
15  
16 We aim to address these problems with a meta-analytical study investigating the performance  
17  
18 implications of teamwork. A meta-analytical approach moves beyond existing reviews on  
19  
20 teamwork in healthcare[8,14-17] and quantitatively tests if the widely advocated positive effect  
21  
22 of teamwork on performance holds true. In addition, this approach allows us to investigate  
23  
24 context variables as moderators that may influence the effect of teamwork on performance,  
25  
26 meaning that this effect might be stronger or weaker under certain conditions. Previous meta-  
27  
28 analyses[18,19] focused mainly on the effectiveness of team trainings but not on the effect of  
29  
30 teamwork itself. This meta-analysis will generate quantitative evidence to inform the relevance  
31  
32 of future interventions, regulations and policies targeting teamwork in healthcare organizations.  
33  
34  
35  
36

37 In the following we will first establish an operational definition of teamwork, elaborate on  
38  
39 relevant contextual factors, and present our respective meta-analytic results and their  
40  
41 interpretation.  
42  
43  
44  
45  
46

### 47 **Teams, teamwork and team performance**

48

49 In order to clearly understand the impact of teamwork on performance it is necessary to  
50  
51 provide a brief introduction to teams, teamwork and team performance. We define teams as  
52  
53 identifiable social work units consisting of two or more people with several unique  
54  
55  
56  
57  
58  
59  
60

1  
2  
3 characteristics. These characteristics include *a)* dynamic social interaction with meaningful  
4 interdependencies; *b)* shared and valued goals, *c)* a discrete lifespan, *e)* distributed expertise and  
5  
6 *f)* clearly assigned roles and responsibilities.[20,21] Based on this definition it becomes clear that  
7  
8 teams must dynamically share information and resources amongst members and coordinate their  
9  
10 activities in order to fulfil a certain task—in other words teams need to engage in *teamwork*.  
11  
12

13  
14 *Teamwork* as a term is widely used and often difficult to grasp. However, we absolutely  
15  
16 require a clear definition of teamwork especially for team trainings that target specific  
17  
18 behaviours. *Teamwork* is a process that describes interactions among team members who  
19  
20 combine collective resources to resolve task demands (e.g. giving clear orders).[22,23]  
21  
22 Teamwork or team processes can be differentiated from *taskwork*. *Taskwork* denotes a team's  
23  
24 individual interaction with tasks, tools, machines and systems.[23] *Taskwork* is independent of  
25  
26 other team members and is often described as *what* a team is doing whereas *teamwork* is *how* the  
27  
28 members of a team are doing something with each other.[24] Therefore, *team performance*  
29  
30 represents the accumulation of teamwork and taskwork (i.e. what the team actually does).[25]  
31  
32  
33

34  
35 Team performance is often described in terms of inputs, processes and outputs (IPO).[22,26-  
36  
37 28] *Outputs* like quality of care, errors or performance are influenced by team related *processes*  
38  
39 (i.e. teamwork) like communication, coordination or decision making. Furthermore, these  
40  
41 processes are influenced by various *inputs* like team members' experience, task complexity, time  
42  
43 pressure and more. The IPO framework emphasizes the critical role of team processes as the  
44  
45 mechanism by which team members combine their resources and abilities, shaped by the context,  
46  
47 to resolve team task demands. It has been the basis of other more advanced models[27-29] but  
48  
49 has also been criticized because of its simplicity.[30] However, it is still the most popular  
50  
51  
52  
53  
54  
55  
56  
57  
58  
59

1  
2  
3 framework to date and helps to systematize the mechanisms that predict team performance and  
4  
5 represents the basis for the selection of the studies included in our meta-analysis.  
6  
7  
8  
9

### 10 **Contextual factors of teamwork effectiveness**

11  
12 Based on a large body of team research from various domains, we hypothesize that several  
13  
14 contextual and methodological factors might moderate the effectiveness of teamwork, indicating  
15  
16 that teamwork is more important under certain conditions.[31,32] Therefore, we investigate  
17  
18 several factors: (a) team characteristics (i.e. professional composition, team familiarity, team  
19  
20 size); (b) task type (i.e. routine vs. non-routine tasks); (c) two methodological factors related to  
21  
22 patient realism (i.e. simulated vs. real) and the type of performance measures used (i.e. process  
23  
24 vs. outcome performance). In the following we discuss these potentially moderating factors and  
25  
26 the proposed effects on teamwork.  
27  
28  
29

30  
31 *Professional composition.* We distinguished between interprofessional and uniprofessional  
32  
33 teams. Interprofessional teams consist of members from various professions that must work  
34  
35 together in a coordinated fashion.[33] Diverse educational paths in interprofessional teams may  
36  
37 shape respective values, beliefs, attitudes and behaviours.[34] As a result team members with  
38  
39 different backgrounds might perceive and interpret the environment differently and have a  
40  
41 different understanding of how to work together. Therefore, we assume that explicit teamwork is  
42  
43 especially important in interprofessional teams compared to uniprofessional teams.  
44  
45

46  
47 *Team familiarity.* If team members have worked together, they are familiar with their  
48  
49 individual working styles; and roles and responsibilities are usually clear. If a team works  
50  
51 together for the first time, this potential lack of familiarity and clarity might make teamwork  
52  
53 even more important. Therefore, we differentiate between *real teams* that also work together in  
54  
55  
56  
57  
58  
59  
60



1  
2  
3 their everyday clinical practice and *experiential teams* that only came together for study  
4  
5 purposes.  
6

7  
8 *Team size.* Another factor that may moderate the relationship between teamwork and  
9  
10 performance is team size. Since larger teams exhibit more linkages among members than smaller  
11  
12 teams, they also face greater coordination challenges. Also, with increasing size teams have  
13  
14 greater difficulty developing and maintaining role structures and responsibilities. For these  
15  
16 reasons, we expect the influence of teamwork on clinical performance to be stronger in larger  
17  
18 teams as compared to smaller teams.  
19

20  
21 *Task type.* Routine situations are characterized by repetitive and unvarying actions (e.g.  
22  
23 standard anaesthesia induction).[35] In contrast, non-routine situations exhibit more variation  
24  
25 and uncertainty, requiring teams to be flexible and adaptive. Whereas team members mostly rely  
26  
27 on pre-learned sequences during routine situations, during non-routine situations we assume that  
28  
29 teamwork is more important in order for team members to resolve task demands.  
30  
31

32  
33 *Patient realism.* Authors highlight the importance of using medical simulators in  
34  
35 education.[36] Therefore, we investigate the realism used in a study (simulated vs. real patients)  
36  
37 as a potential methodological factor that influences the relationship between teamwork and  
38  
39 performance. Studies conducted with medical simulators might be more standardized and less  
40  
41 influenced by confounding variables than studies conducted with real patients. Therefore, results  
42  
43 from simulation studies might show stronger relationships between the two variables. Further,  
44  
45 using a simulator could cause individuals and teams to act differently than in real settings,  
46  
47 thereby distorting the results. However, in the last decade high-fidelity simulators have become  
48  
49 increasingly realistic, suggesting that the results from simulation studies generalize to real  
50  
51 environments. Including realism as a contextual factor in our analysis will reveal if the effects of  
52  
53  
54  
55  
56  
57  
58  
59  
60

1  
2  
3 teamwork observed in simulation compare with real life settings. Better understanding would  
4  
5 provide important insights about simulation use in teamwork studies.  
6

7  
8 *Performance measures.* As a second methodological factor, we expect that the type of  
9  
10 performance measure used in a study influences the reported teamwork effectiveness. The  
11  
12 literature usually differentiates between process- and outcome-related aspects of  
13  
14 performance.[37,38] Process performance measures are action-related aspects and refer to  
15  
16 adequate behaviour during procedures (e.g. adhering to guidelines), making them easier to  
17  
18 assess. Outcome performance measures (e.g. infection rates after operations) follow team  
19  
20 actions, with assessment occurring later than process measures. Outcome performance measures  
21  
22 suffer from several factors: greater sensitivity to confounding variables (e.g. comorbidities),  
23  
24 assessment challenges, and greater difficulty linking team processes to outcomes. Looking at the  
25  
26 predictors of the survival of cardiac arrest patients illustrates the difference between the two  
27  
28 types of performance measures. The main predictors for the survival (i.e. performance outcome)  
29  
30 of a cardiac arrest patient are “*duration of the arrest*” and “*age of the patient less than 70*”. [39]  
31  
32 Although a team delivers perfect basic life support (i.e. high process performance) the patient  
33  
34 can still die (i.e. low outcome performance). Due to these methodological considerations, we  
35  
36 expect that studies assessing process performance report a stronger relationship between  
37  
38 teamwork and performance than studies assessing outcome performance.  
39  
40  
41  
42  
43  
44  
45  
46  
47  
48  
49  
50  
51  
52  
53  
54  
55  
56  
57  
58  
59  
60

## METHODS

The study was conducted based on the recommendations of the PRISMA statement[40] as well as established guidelines in social sciences.[41,42] Through the combination of studies in the meta-analytical process, we will increase the statistical power and provide an accurate estimation of the true impact that teamwork has on performance.

### Search strategy

We applied the following search strategy to select relevant papers: *a)* an electronic search of the data base PubMed (no limit was placed on the date of publication, last search 19th of June 2018) using the key words *teamwork, coordination, decision making, leadership and communication* in combination with *patient safety, clinical performance*, the final syntax for PubMed is available online (Supplementary File), *b)* a manual backwards search for all references cited by 8 systematic literature reviews that focus on teamwork or non-technical skills in various healthcare domains,[8,15,17,43-47] *c)* a manual backwards search for all references cited in studies we included in our meta-analysis, *d)* a manual forward search using Web of Science to identify studies that cite the studies we included in our meta-analysis, *e)* identification of relevant unpublished manuscripts via e-mail from authors currently investigating medical teams using specific mailing lists.

### Inclusion criteria

Studies were included if a construct complied to the definition of teamwork processes outlined in the introduction (e.g. coordination, communication). In addition, studies needed to investigate the relationship between at least one teamwork process and a performance measure (e.g. patient outcome). When studies reported multiple estimates of the same relationship from

1  
2  
3 the same sample (e.g. between coordination and more than one indicator of performance), those  
4 correlations were examined separately only as appropriate for sub-analyses, but an average  
5 correlation was computed for all global meta-analyses of those relationships to maintain  
6 independence.[41] We excluded articles investigating long-term care since the coordination of  
7 care for chronically ill patients has to consider the unique team task interdependencies in this  
8 setting.[48] Also, teams working together over longer periods of time are more likely to develop  
9 emergent states (e.g. team cohesion) that influence how a specific team works together.[24] All  
10 articles included in this meta-analysis are listed in Table 1 and Table 2.

11  
12 For the criterion level of analysis, we included only effect sizes at the team level and not on  
13 an individual level. Therefore, the performance measure had to be clearly linked to a team. This  
14 approach aligns with research that strongly recommends against mixing levels of analysis in  
15 meta-analytic integrations.[49,50]

16  
17 Two reviewers independently screened titles and abstracts from articles yielded in the search.  
18 Afterwards full texts of all relevant articles were obtained and screened by the same two  
19 reviewers. Agreement was above 90%. Any disagreement in the selection process was resolved  
20 through consensus discussion.

### 21 22 **Data extraction**

23  
24 With the help of a jointly developed coding scheme, studies were independently coded by  
25 one of the authors (JS) and another rater, both with a background in industrial psychology and  
26 human factors. 20% of the studies were rated by both coders. Intercoder agreement was above  
27 90%. Any disagreement was resolved through discussion. The data extracted comprised details  
28 of the authors and publication as well as important study characteristics and statistical  
29 relationships between a teamwork variable and performance (Table 2).

### Coding of team characteristics

The *professional composition* of teams was coded either as “Interprofessional” if a team consisted of members from different professions (e.g. nurses and physicians) or as “Uniprofessional” if the members of the teams were of the same profession. *Team size* was coded as the number of members (average number if team size varied) of the investigated teams. Team familiarity was coded either as “experimental” or “real”. “Real” indicates that the team members also worked together in their everyday clinical practice. “Experimental” means that the teams only worked together during the study.

### Coding of task characteristics

*Task type* was coded either as “Routine task” or “Non-routine task”. We defined “Non-routine tasks” as unexpected events that require flexible behavior often under time-pressure (e.g. emergency situations). “Routine tasks” describe previously planned standard procedures (e.g. standard anesthesia induction, planned surgery).

### Coding of methodological factors

*Patient realism* was either coded as “Real patient” or “Simulated patient”. “Simulated patient” included a patient simulator (manikin) whereas “Real patient” included real patients in clinical settings.

*Clinical performance measures* were coded either as “Outcome performance” or “Process performance”. [38,51] “Outcome performance” includes an outcome that is measured after the treatment process (e.g. infection rate, mortality). We focused only on patient-related outcomes

1  
2  
3 and not on team outcomes (e.g. team satisfaction). “Process performance” describes the  
4 evaluation of the treatment process and describes how well the process was executed (e.g.  
5 adherence to guidelines through expert rating). Process performance measures are often based on  
6 official guidelines and extensive expert knowledge.[52] Thus, we assumed that process  
7 performance closely relates to patient outcomes.  
8  
9

### 14 **Statistical Analysis**

16  
17 Different types of effect sizes (e.g. Odds ratio,  $F$  values, and  $r$ ) have been reported in the  
18 original studies. We therefore converted the different effect sizes to a common metric, namely  $r$   
19 using the formulas provided by Borenstein et al.[53] and Walker.[54] Moreover, some samples  
20 contained effect sizes of teamwork with two or more measures of performance. Because  
21 independence of the included effects sizes is required for a meta-analysis,[41,55] we used  
22 Fisher’s  $z$  score to average the multiple correlations from the same sample. The correlations were  
23 weighted for sample size. However, in contrast to many meta-analyses in social sciences, the  
24 correlations were not adjusted for measurement reliability. This is because information about the  
25 measurement reliability could not be compared (Kappa vs. Cronbach Alpha) or were not  
26 available at all for the majority of studies. Therefore, we report uncorrected, sample-size  
27 weighted mean correlation, its 95% confidence interval (CI), and the 80% credibility interval  
28 (CR). The CI reflects the accuracy of a point estimate and can be used to examine the  
29 significance of the effect size estimates, whereas the CR refers to the deviation of these estimates  
30 and informs us about the existence of possible moderators.  
31  
32  
33  
34  
35  
36  
37  
38  
39  
40  
41  
42  
43  
44  
45  
46  
47  
48

49 Random-effects models were estimated based on two considerations.[56] First, we expected  
50 study heterogeneity to be high given the different study design characteristics such as *patient*  
51 *realism* (“Real patient” vs. “Simulated patient”), *task type* (“Routine task” vs. “Non-routine  
52  
53  
54  
55  
56  
57  
58  
59  
60

1  
2  
3 task”), and different forms of performance measures. Second, we aimed to provide an inference  
4  
5 on the average effect in the entire population of studies from which the included studies are  
6  
7 assumed to be a random selection of it. Therefore, random-effects models were estimated.[56]  
8  
9  
10 These models were calculated by the restricted maximum-likelihood estimator, an efficient and  
11  
12 unbiased estimator.[57] Since we included only descriptive studies and no interventions we only  
13  
14 included the sample size of the individual studies as a potential bias into the meta-analysis. To  
15  
16 rule out a potential publication bias, we tested for funnel plot asymmetry using the random-effect  
17  
18 version of the Egger test.[58] The results indicate that there is no asymmetry in the funnel plot ( $z$   
19  
20 = 1.79,  $p = .074$ ), suggesting that there is no publication bias.  
21  
22

23  
24 The estimation of meta-analytical models including the outlier analyses were performed  
25  
26 with the package “metafor” from the programming language and statistical environment R.[57]  
27

### 28 **Patient and public involvement**

29  
30 Patients and public were not involved in this study.  
31  
32  
33  
34  
35  
36  
37

## 38 **RESULTS**

39  
40 The online search resulted in 2002 articles (Figure 1). Two studies were identified via  
41  
42 contacting authors directly and have been presented at conferences in the past.[59,60] After  
43  
44 duplicates were removed 1988 articles were screened using title and abstract. 67 articles were  
45  
46 then selected for a full text review. Full text examination, forward and backward search of  
47  
48 selected articles and relevant reviews resulted in 30 studies coming from 28 articles (Two  
49  
50 publications presented two independent studies in one publication[61,62]). This led to a total of  
51  
52 32 studies coming from 30 articles. Following the recommendation by Viechtbauer and Cheung,  
53  
54  
55  
56  
57  
58  
59  
60

1  
2  
3 [63] we screened for outliers using studentized deleted residuals. One case (Carlson et al.,[9]  $r =$   
4  
5 .89,  $n = 44$ , studentized deleted residuals = 4.26) was identified as outlier and therefore excluded  
6  
7 from further analyses, resulting in a final sample size of  $k = 31$ .  
8  
9

10 Table 1 provides a qualitative description of the selected articles including study objectives,  
11 the setting in which the studies were carried out and a description of the teamwork processes as  
12 well as the outcome measures that were assessed. If a specific tool for the assessment of a  
13 teamwork process or outcome measure was used this is indicated in the corresponding column.  
14  
15 Observational studies were most prevalent. Teamwork processes were assessed using either  
16 behaviourally anchored rating scales ( $N=8$ ) or structured observation ( $N=19$ ) of specific  
17 teamwork behaviour. Structured observation—as we describe it—is defined as a purely  
18 descriptive assessment of certain behaviour usually using a predefined observation system (e.g.  
19 amount of speaking up behaviour). In contrast, behaviourally anchored rating scales consist of an  
20 evaluation of teamwork process behaviour by an expert. Only three studies used surveys to  
21 assess teamwork behaviours. The majority of the studies ( $N=27$ ) assessed process performance  
22 using either a checklist-based expert rating or assessing a reaction time measure after the  
23 occurrence of a certain event (e.g. time until intervention). Only four studies assessed outcome  
24 performance measures. Measures included accuracy of diagnosis, postoperative complications  
25 and death, surgical morbidity and mortality, ventilator-associated pneumonia, bloodstream  
26 infections, pressure ulcers and acute physiology and chronic health evaluation score. Table 2  
27 provides an overview of all variables included in the meta-analysis including the effect sizes and  
28 moderator variables.  
29  
30  
31  
32  
33  
34  
35  
36  
37  
38  
39  
40  
41  
42  
43  
44  
45  
46  
47  
48  
49  
50  
51  
52  
53

#### 54 **Effect of teamwork and contextual factors**

55  
56  
57  
58  
59  
60



1  
2  
3 Table 3 and Figure 2 shows the relationship between teamwork and team performance.  
4  
5 The sample-sized weighted mean correlation was .28 (95% CI: .20 to .35,  $z = 6.55$ ,  $p < .001$ ),  
6  
7 indicating that teamwork is positively related to clinical performance. Results further indicated  
8  
9 heterogeneous effect size distributions across the included samples ( $Q = 53.73$ ,  $p < .05$ ,  $I^2 =$   
10  
11 45.96), signifying that the variability across the sample effect sizes was more than what would be  
12  
13 expected from sampling error alone.  
14  
15

16  
17 To test for moderator effects of the contextual factors, we conducted mixed-effects  
18  
19 models including the mentioned moderators: *professional composition*, *team familiarity*, *team*  
20  
21 *size*, *task type*, *patient realism* and *performance measures*.  
22  
23

24 The omnibus test of moderators was not significant ( $F = 0.18$ ,  $df_1 = 6$ ,  $df_2 = 18$ ,  $p > .20$ ),  
25  
26 suggesting that the examined contextual factors did not influence the average effect of teamwork  
27  
28 on clinical performance. To provide greater detail about the role of the contextual factors, we  
29  
30 conducted separate analyses for the categorical contextual factors and report them in Table 3.  
31  
32  
33  
34  
35  
36  
37  
38  
39  
40  
41  
42  
43  
44  
45  
46  
47  
48  
49  
50  
51  
52  
53  
54  
55  
56  
57  
58  
59  
60

## DISCUSSION

With this study, we aimed to provide evidence for the performance implications of teamwork in healthcare teams. By including various contextual factors, we investigated potential contingencies that these factors might have on the relationship between teamwork and clinical performance. The analysis of 1390 teams from 31 different studies showed that teamwork has a medium sized effect ( $r=.28$ ; [64,65]) on clinical performance across various care settings. Our study is the first to investigate this relationship quantitatively with a meta-analytical procedure. This finding aligns with and advances previous work that explored this relationship in a qualitative way.[8,15,17,43-47]

At first glance a correlation of  $r=.28$  might not seem very high. However, we would like to highlight that  $r=.28$  is considered a medium sized effect[64,65] and should not be underestimated. To better illustrate what this effect means we transformed the correlation into an odds ratio (OR) of 2.8.[53] Of course, this transformation simplifies the correlation because teamwork and often the outcome measures are not simple dichotomous variables that can be divided into an intervention and control group. However, this transformation illustrates that teams who engage in teamwork processes are 2.8 times more likely to achieve high performance than teams who are not. Looking at the performance measures in our study we see that they either describe patient outcomes (e.g. mortality, morbidity) or are closely related to patient outcomes (e.g. adherence to treatment guidelines). Thus, we consider teamwork a performance-relevant process that needs to be promoted through training and implementation into treatment guidelines and policies.

The included studies used a variety of different measures for clinical performance. This variability resulted from the different clinical contexts in which the studies were carried out.

1  
2  
3 There is no universal measure for clinical performance because the outcome is in most cases  
4 context specific. In surgery, common performance measures are surgical complications,  
5  
6 mortality or morbidity.[66] In anaesthesia, studies often use expert ratings based on checklists to  
7  
8 assess the provision of anaesthesia. Expert ratings are also the common form of performance  
9  
10 assessment in simulator settings where patient outcomes like morbidity or mortality cannot be  
11  
12 measured. Future studies need to be aware that clinical performance measures depend on the  
13  
14 clinical context and that the development of valid performance measures requires considerable  
15  
16 effort and scientific rigor. Guidelines on how to develop performance assessment tools for  
17  
18 specific clinical scenarios exist and need to be accounted for.[52,67,68] Furthermore, depending  
19  
20 on the clinical setting researchers need to evaluate what specific clinical performance measures  
21  
22 are suitable and if and how they can be linked to team processes in a meaningful way.  
23  
24  
25  
26  
27

28 The analysis of moderators illustrates that teamwork is related with performance under a  
29  
30 variety of conditions. Our results suggest that teams in different contexts characterised by  
31  
32 different team constellations, team size and levels of acuity of care all benefit from teamwork.  
33  
34 Therefore, clinicians and educators from all fields should strive to maintain or increase effective  
35  
36 teamwork. In recent years, there has been an upsurge in crisis resource management (CRM).[19]  
37  
38 These trainings focus on team management and implement various teamwork principles during  
39  
40 crisis situations (e.g. emergencies).[69] Our results suggest that team trainings should not only  
41  
42 focus on non-routine situations like emergencies but also on routine situations (e.g. routine  
43  
44 anaesthesia induction, routine surgery) because based on our data teamwork is equally important  
45  
46 in such situations.  
47  
48  
49

50  
51 A closer look at methodological factors of the included studies revealed that the observed  
52  
53 relationship between teamwork and performance in simulation settings does not differ from  
54  
55  
56  
57  
58

1  
2  
3 relationships observed in real settings. Therefore, we conclude that teamwork studies conducted  
4  
5 in simulation settings generalize to real life settings in acute care. Further, the analysis of  
6  
7 different performance measures reveals a trend towards process performance measures being  
8  
9 more strongly related with teamwork than outcome performance measures. A possible  
10  
11 explanation of this finding relates to the difficulty of investigating outcome performance  
12  
13 measures in a manner isolated from other variables. Nevertheless, we still found a significant  
14  
15 relationship between teamwork and objective patient outcomes (e.g. postoperative complications,  
16  
17 bloodstream infections) despite the methodological challenges of measuring outcome  
18  
19 performance and the small number of studies using outcome performance ( $k = 4$ ).  
20  
21  
22  
23

24 Our results are in line with previous meta-analyses investigating the effectiveness of team  
25  
26 training in healthcare.[18,19] Similar to our results, Hughes et al. highlighted the effectiveness of  
27  
28 team trainings under a variety of conditions—irrespective of team composition,[18] simulator  
29  
30 fidelity or patient acuity of the trainee's unit as well as other factors.  
31  
32

33 We were unable to find a moderation of task type in our study, potentially explained by task  
34  
35 interdependence, which reflects the degree to which team members depend on one another for  
36  
37 their effort, information, and resources.[70] A meta-analysis including teams from multiple  
38  
39 industries (e.g. project teams, management teams) found that task interdependence moderates the  
40  
41 relationship between teamwork and performance, demonstrating the importance of teamwork for  
42  
43 highly interdependent team tasks.[71] Most studies included in our analysis focused on rather  
44  
45 short and intense patient care episodes (e.g. a surgery, a resuscitation task) with high task  
46  
47 interdependence, which may explain the high relevance of teamwork for all these teams.  
48  
49  
50  
51  
52  
53  
54  
55  
56  
57  
58  
59  
60

### Limitations and future directions

Despite greater attention to healthcare team research and team training over the last decade, we were only able to identify 32 studies (31 included in the meta-analysis). Of note, over two-thirds of the studies in our analysis emerged in the last 10 years, reflecting the increasing interest in the topic. The rather small number of studies might relate to the difficulties in quantifying teamwork, the considerable theoretical and methodological knowledge required, and the challenges of capturing relevant outcome measures. Also, besides the manual searches of selected articles and reviews and contacting authors in the field we did only search the data base PubMed. PubMed is the most common database to access papers that potentially investigate medical teams and includes approximately 30'000 journals from the field of medicine, psychology and management. We are confident that through the additional inclusion of relevant reviews and forward and backwards search, our results represent an accurate representation of what can be found in the literature.

Future research should build on recent theoretical and applied work[24,26,28,72] about teamwork and use this current meta-analysis as a signpost for future investigations. In order to move our field forward, we must use existing conceptual frameworks[22,24,26] and establish standards for investigating teams and teamwork. This can often only be achieved with interdisciplinary research teams including experts from the medical fields but equally important from health professions education, psychology or communication studies.

Another limitation relates to the unbalanced analysis of subgroups. For example, we only identified four studies that used outcome performance variables compared to 27 using process performance measures. Uneven groups may reduce the power to detect significant differences.

1  
2  
3 Therefore, we encourage future studies to include outcome performance measures despite the  
4 effort required.  
5  
6

7  
8 Finally, more factors may influence the relationship between teamwork and performance that  
9 we were unable to extract from the studies. While we tested for the effects of team familiarity by  
10 comparing experimental teams and real teams, this does not fully capture team member  
11 familiarity. The extent to which team members actually worked together during prior clinical  
12 practice might predict of how effectively they perform together. However, even two people  
13 working in the same ward might actually not have interacted much during patient care depending  
14 on the setting. Also team climate on a ward or in a hospital may be an important predictor of how  
15 well teams work together, especially related to sharing information or speaking up within the  
16 team.[73,74]  
17  
18  
19  
20  
21  
22  
23  
24  
25  
26  
27

28 Finally, the clinical context might play a role in how team members collaborate. In different  
29 disciplines, departments or healthcare institutions different norms and routines exist on how to  
30 work together. Therefore, study results and recommendations about teamwork need to be  
31 interpreted in the light of the respective clinical context. There are empirical indications that a  
32 one-size-fits-all approach might not be suitable and team training efforts cannot ignore the  
33 clinical context, especially the routines and norms about collaboration.[75] We acknowledge that  
34 there might be other factors surrounding healthcare teams that might potentially influence  
35 teamwork and clinical performance. However, in this review we could only extract data that was  
36 reported in the primary studies. Since these were limited in the healthcare contexts studied, the  
37 results might not generalise to long-term care settings or mental health, for example. Future work  
38 needs to consider and also document a broader range of potentially influencing factors.  
39  
40  
41  
42  
43  
44  
45  
46  
47  
48  
49  
50  
51  
52  
53  
54  
55  
56  
57  
58  
59  
60

## Conclusion

The current meta-analysis confirms that teamwork across various team compositions represents a powerful process to improve patient care. Good teamwork can be achieved by joint reflection about teamwork during clinical event debriefings[76,77] as well as team trainings[78] and system improvement. All healthcare organisations should recognise these findings and place continuous efforts into maintaining and improving teamwork for the benefit of their patients.

For peer review only

1  
2  
3 **Funding statement:** This work was funded by the European Society of Anaesthesiology (ESA)  
4 and the Swiss National Science Foundation (SNSF, Grant No. P300P1\_177695). The ESA  
5 provided resources for an additional research assistant helping with literature search and  
6 selection. Part of the salary of JS was funded by the SNSF.  
7  
8  
9

10  
11  
12 **Competing interests:** All authors have completed the Unified Competing Interest form  
13 (available on request from the corresponding author) and declare no support from any  
14 organisation for the submitted work; no financial relationships with any organisations that might  
15 have an interest in the submitted work; no other relationships or activities that could appear to  
16 have influenced the submitted work.  
17  
18  
19

20  
21  
22 **Author contributions:** All authors substantially contributed to this study and were involved in  
23 the study design. JS drafted the paper. LM analysed the data and revised the manuscript for  
24 content. TM revised the manuscript for content and language. All authors approved the final  
25 version.  
26  
27  
28

29  
30  
31  
32 **Ethics approval:** Not required  
33

34  
35 **Acknowledgements:** The authors thank Manuel Stühlinger for his help with study selection and  
36 data extraction and Walter J. Eppich, MD, PhD for a critical review and proof reading the  
37 manuscript.  
38  
39  
40

41  
42 **Data sharing:** Dataset is available from the corresponding author.  
43  
44  
45  
46  
47  
48  
49  
50  
51  
52  
53  
54  
55  
56  
57  
58  
59  
60



**REFERENCE**

- 1 Thomas EJ. Improving teamwork in healthcare: current approaches and the path forward. *BMJ Quality & Safety* 2011;20:647–50.
- 2 Salas E, Rosen MA. Building high reliability teams: progress and some reflections on teamwork training. *BMJ Quality & Safety* 2013;22:369–73.
- 3 Schraag JM, Schouten T, Smit M, Haas F, van der Beek D, van de Ven J, et al. A prospective study of paediatric cardiac surgical microsystems: assessing the relationships between non-routine events, teamwork and patient outcomes. *BMJ Quality & Safety* 2011;20:599–603.
- 4 Williams AL, Lasky RE, Dannemiller JL, Andrei AM, Thomas EJ. Teamwork behaviours and errors during neonatal resuscitation. *BMJ Quality & Safety* 2010;19:60–4.
- 5 Guerlain S, Turrentine FE, Bauer DT, Calland JF, Adams R. Crew resource management training for surgeons: Feasibility and impact. *Cognition, Technology & Work* 2008;10:255–64.
- 6 McCulloch P, Mishra A, Handa A, Dale T, Hirst G, Catchpole K. The effects of aviation-style non-technical skills training on technical performance and outcome in the operating theatre. *Qual Saf Health Care* 2009;18:109–15.
- 7 Yule S, Flin R, Maran N, Youngson G, Mitchell A, Rowley D, et al. Debriefing surgeons on non-technical skills (NOTSS). *Cogn Tech Work* 2007;139:131–274.
- 8 Schmutz J, Manser T. Do team processes really have an effect on clinical performance? A systematic literature review. *Br J Anaesth* 2013;110:529–44.
- 9 Carlson J, Min E, Bridges D. The impact of leadership and team behavior on standard of

- care delivered during human patient simulation: A pilot study for undergraduate medical students. *Teach Learn Med* 2009;21:24–32.
- 10 Mishra A, Catchpole K, McCulloch P. The Oxford NOTECHS System: Reliability and validity of a tool for measuring teamwork behaviour in the operating theatre. *Qual Saf Health Care* 2009;18:104–8.
- 11 Manojlovich M, DeCicco B. Healthy Work Environments, Nurse-Physician Communication, and Patients Outcomes. *Am J Crit Care* 2007;16:536–43.
- 12 Schmutz J, Hoffmann F, Heimberg E, Manser T. Effective coordination in medical emergency teams: The moderating role of task type. *European Journal of Work and Organizational Psychology* 2015;24:761–76.
- 13 Tschan F, Semmer NK, Nägele C, Gurtner A. Task adaptive behavior and performance in groups. *Group Processes & Intergroup Relations* 2000;3:367–86.
- 14 Manser T. Teamwork and patient safety in dynamic domains of healthcare: a review of the literature. *Acta Anaesthesiol Scand* 2009;53:143–51.
- 15 Fernandez Castela E, Russo SG, Riethmüller M, Boos M. Effects of team coordination during cardiopulmonary resuscitation: A systematic review of the literature. *J Crit Care* 2013;28:504–21.
- 16 Dietz AS, Pronovost PJ, Benson KN, Mendez-Tellez PA, Dwyer C, Wyskiel R, et al. A systematic review of behavioural marker systems in healthcare: what do we know about their attributes, validity and application? *BMJ Quality & Safety* 2014;23:1031–9.
- 17 Flowerdew L, Brown R, Vincent C, Woloshynowych M. Identifying nontechnical skills associated with safety in the emergency department: a scoping review of the literature. *Ann Emerg Med* 2012;59:386–94.

- 1  
2  
3 18 Hughes AM, Gregory ME, Joseph DL, Sonesh SC, Marlow SL, Lacerenza CN, et al.  
4  
5 Saving Lives: A Meta-Analysis of Team Training in Healthcare. *J Appl Psychol*  
6  
7 2016;1266–304.  
8  
9  
10 19 O'Dea A, O'Connor P, Keogh I. A meta-analysis of the effectiveness of crew resource  
11  
12 management training in acute care domains. *Postgrad Med J* 2014;90:699–708.  
13  
14 20 Salas E, Rosen MA, King H. Managing teams managing crises: principles of teamwork  
15  
16 to improve patient safety in the Emergency Room and beyond. *Theoretical Issues in*  
17  
18 *Ergonomics Science* 2007;8:381–94.  
19  
20  
21 21 Salas E, Stagl KC, Burke CS, Goodwin GF. Fostering team effectiveness in  
22  
23 organizations: Toward an integrative theoretical framework. vol. 52, 2007, p. 185.  
24  
25  
26 22 Fernandez R, Kozlowski SW, Shapiro MJ, Salas E. Toward a definition of teamwork in  
27  
28 emergency medicine. *Acad Emerg Med* 2008;15:1104–12.  
29  
30  
31 23 Bowers CA, Braun CC, Morgan BB. Team workload: Its meaning and measurement. In:  
32  
33 Brannik MT, Salas E, Prince C, editors. *Team Performance Assessment and*  
34  
35 *Measurement: Theory, methods, and applications*, New York: Team performance  
36  
37 assessment and measurement: Theory, methods, and applications; 1997, pp. 85–108.  
38  
39  
40 24 Marks MA, Mathieu JE, Zaccaro SJ. A temporally based framework and taxonomy of  
41  
42 team processes. *The Academy of Management Review* 2001;26:356–76.  
43  
44  
45 25 Dietz AS, Pronovost PJ, Mendez-Tellez PA, Wyskiel R, Marsteller JA, Thompson DA,  
46  
47 et al. A systematic review of teamwork in the intensive care unit: What do we know  
48  
49 about teamwork, team tasks, and improvement strategies? *J Crit Care* 2014;29:908–14.  
50  
51  
52 26 Reader TW, Flin R, Mearns K, Cuthbertson BH. Developing a team performance  
53  
54 framework for the intensive care unit. *Crit Care Med* 2009;37:1787–93.  
55  
56  
57  
58  
59  
60

- 1  
2  
3 27 Ilgen DR, Hollenbeck JR, Johnson M, Jundt D. Teams in organizations: From input-  
4 process-output models to IMO models. *Annu Rev Psychol* 2005;56:517–43.  
5  
6  
7 28 Burke CS, Stagl KC, Salas E, Pierce L, Kendall D. Understanding team adaptation: a  
8 conceptual analysis and model. *J Appl Psychol* 2006;91:1189–207.  
9  
10  
11 29 Lemieux-Charles L. What Do We Know about Health Care Team Effectiveness? A  
12 Review of the Literature. *Med Care Res Rev* 2006;63:263–300.  
13  
14  
15 30 Kozlowski SWJ. Advancing research on team process dynamics: Theoretical,  
16 methodological, and measurement considerations. *Organizational Psychology Review*  
17 2015;5:270–99.  
18  
19  
20 31 Maloney MM, Bresman H, Zellmer-Bruhn ME, Beaver GR. Contextualization and  
21 Context Theorizing in Teams Research: A Look Back and a Path Forward. *The*  
22 *Academy of Management Annals* 2016;10:891–942.  
23  
24  
25 32 Kozlowski SW, Klein KJ. A multilevel approach to theory and research in  
26 organizations: Contextual, temporal, and emergent processes. 2000.  
27  
28  
29 33 Schofield RF, Amodeo M. Interdisciplinary teams in health care and human services  
30 settings: are they effective? *Health & Social Work* 1999;24:210–9.  
31  
32  
33 34 Hall P. Interprofessional teamwork: Professional cultures as barriers. *Journal of*  
34 *Interprofessional Care* 2005;19:188–96.  
35  
36  
37 35 Lillrank P. The quality of standard, routine and nonroutine processes. *Organization*  
38 *Studies* 2003;24:215–33.  
39  
40  
41 36 Eppich WJ, O'Connor L, Adler M. Providing effective simulation activities. In: Forrest  
42 K, McKimm J, Edgar S, editors. *Essential Simulation in Clinical Education*, Oxford,  
43 UK: John Wiley & Sons, Ltd; 2013, pp. 213–34.  
44  
45  
46  
47  
48  
49  
50  
51  
52  
53  
54  
55  
56  
57  
58  
59  
60

- 1  
2  
3 37 Anderson N, Ones DS, Sinangil HK, Viswesvaran C. Handbook of industrial, work and  
4 organizational psychology: Personnel psychology. vol. 1. London: Sage Publications  
5 Ltd; 2001.  
6  
7  
8  
9  
10 38 Sonnentag S, Frese M. Performance concepts and performance theory. Psychological  
11 Management of Individual Performance 2002;23:3–25.  
12  
13  
14 39 Cooper S, Cade J. Predicting survival, in-hospital cardiac arrests: resuscitation survival  
15 variables and training effectiveness. Resuscitation 1997;35:17–22.  
16  
17  
18  
19 40 Liberati A, Altman DG, Tetzlaff J, Mulrow C, Gøtzsche PC, Ioannidis JPA, et al. The  
20 PRISMA Statement for Reporting Systematic Reviews and Meta-Analyses of Studies  
21 That Evaluate Health Care Interventions: Explanation and Elaboration. PLoS Med  
22 2009;6:e1000100.  
23  
24  
25  
26  
27  
28 41 Hunter JE, Schmidt FL. Methods of meta-analysis: Correcting error and bias in research  
29 findings. Thousand Oaks, CA: Sage Publications; 2004.  
30  
31  
32  
33 42 Card N. Applied Meta-Analysis for Social Science Research. New York: Guilford  
34 Publications; 2015.  
35  
36  
37  
38 43 Fletcher GCL, McGeorge P, Flin RH, Glavin RJ, Maran NJ. The role of non-technical  
39 skills in anaesthesia: a review of current literature. Br J Anaesth 2002;88:418–29.  
40  
41  
42 44 Ghaferi AA, Dimick JB. Importance of teamwork, communication and culture on  
43 failure-to-rescue in the elderly. British Journal of Surgery 2016;103.  
44  
45  
46  
47 45 Mitchell L, Flin R. Non-technical skills of the operating theatre scrub nurse: literature  
48 review. J Adv Nurs 2008;63:15–24.  
49  
50  
51 46 Santos R, Bakero L, Franco P, Alves C, Fragata I, Fragata J. Characterization of non-  
52 technical skills in paediatric cardiac surgery: communication patterns. Eur J  
53  
54  
55  
56  
57  
58  
59  
60

- 1  
2  
3 Cardiothorac Surg 2012;41:1005–12.  
4  
5  
6 47 Youngson GG. Nontechnical skills in pediatric surgery: Factors influencing operative  
7  
8 performance. *Journal of Pediatric Surgery* 2016;51:226–30.  
9  
10 48 Kianfar S, Carayon P, Hundt AS, Hoonakker P. Care coordination for chronically ill  
11  
12 patients: Identifying coordination activities and interdependencies. *Applied Ergonomics*.  
13  
14 2019;80:9-16.  
15  
16  
17 49 Gully SM, Devine DJ, Whitney DJ. A meta-analysis of cohesion and performance  
18  
19 effects of level of analysis and task interdependence. *Small Group Research*  
20  
21 1995;26:497–520.  
22  
23  
24 50 Hunter JE, Schmidt FL. Dichotomization of continuous variables: The implications for  
25  
26 meta-analysis. *Journal of Applied Psychology* 1990;75:334.  
27  
28  
29 51 Campbell JP. Modeling the performance prediction problem in industrial and  
30  
31 organizational psychology. In: Dunnette MD, Hough LM, editors. *Handbook of*  
32  
33 *industrial and organizational psychology*, Palo Alto, CA: Consulting Psychologists  
34  
35 Press; 1990, pp. 687–732.  
36  
37  
38 52 Schmutz J, Eppich WJ, Hoffmann F, Heimberg E, Manser T. Five steps to develop  
39  
40 checklists for evaluating clinical performance: An integrative approach. *Acad Med*  
41  
42 2014;89:996–1005.  
43  
44  
45 53 Borenstein M, Hedges LV, Higgins JPT, Rothstein HR. *Introduction to Meta-Analysis*.  
46  
47 Hoboken, NJ: John Wiley & Sons, Ltd; 2009.  
48  
49  
50 54 Walker DA. JMASM9: converting Kendall's tau for correlational or meta-analytic  
51  
52 analyses. *J Mod Appl Stat Meth* 2003;2:525–30.  
53  
54  
55 55 Lipsey MW, Wilson D. *Practical meta-analysis*. New York: Sage Publications, Inc;

- 2001.
- 56 Viechtbauer W. Conducting meta-analyses in R with the metafor package. *J Stat Softw* 2010;36:1–48.
- 57 Viechtbauer W. Bias and efficiency of meta-analytic variance estimators in the random-effects model. *Journal of Educational and Behavioral Statistics* 2005;30:261–93.
- 58 Sterne JA, Egger M. Regression methods to detect publication and other bias in meta-analysis. *Publication bias in meta-analysis: Prevention, assessment and adjustments*, Chichester: John Wiley & Sons; 2006, pp. 99–110.
- 59 Brogaard L, Kierkegaard O, Hvidmand L, Jensen KR, Uldbjerg N, Musaeus P, et al. Is non-technical performance the key to high clinical performance in obstetric teams? th Annual conference of the British Maternal Fetal Medicine Society, 2018.
- 60 Manser T, Bogdanovic J, Clack L., Arora S, Sevdalis N., Schmutz, J. Surgeon’s team management skills predict clinical performance. Paper presented at the Annual Meeting of the Society in Europe for Simulation Applied to Medecine (SESAM), Lisbon, Portugal, 2015.
- 61 Catchpole KR, Giddings AE, Wilkinson M, Hirst G, Dale T, de Leval MR. Improving patient safety by identifying latent failures in successful operations. *Surgery* 2007;142:102–10.
- 62 Catchpole K, Mishra A, Handa A, McCulloch P. Teamwork and Error in the Operating Room. *Ann Surg* 2008;247:699–706.
- 63 Viechtbauer W, Cheung, MWL. Outlier and influence diagnostics for meta-analysis. *Research Synthesis Methods* 2010;1:112–125.
- 64 Cohen J. *Statistical power analysis for the behavioral sciences*. Hillsdale, NJ: Erlbaum;

- 1  
2  
3 1988.  
4  
5  
6 65 Bosco FA, Aguinis H, Singh K, Field JG, Pierce CA. Correlational effect size  
7  
8 benchmarks. *Journal of Applied Psychology* 2015;100:431.  
9  
10 66 Haynes AB, Weiser TG, Berry WR, Lipsitz SR, Breizat A-HS, Dellinger EP, et al. A  
11  
12 surgical safety checklist to reduce morbidity and mortality in a global population. *N*  
13  
14 *Engl J Med* 2009;360:491–9.  
15  
16 67 Gaba DM, Howard SK, Flanagan B, Smith BE, Fish KJ, Botney R. Assessment of  
17  
18 Clinical Performance during Simulated Crises Using Both Technical and Behavioral  
19  
20 Ratings. *Anesthesiology* 1998;89:8–18.  
21  
22  
23 68 Rosen MA, Pronovost PJ. Advancing the use of checklists for evaluating performance  
24  
25 in health care. *Acad Med* 2014;89.  
26  
27  
28 69 Gaba DM, Howard SK, Fish KJ, Smith BE, Sowb YA. Simulation-based training in  
29  
30 anesthesia crisis resource management (ACRM): a decade of experience. *Simulation &*  
31  
32 *Gaming* 2001;32:175–93.  
33  
34  
35 70 Wageman R, Baker G. Incentives and cooperation: The joint effects of task and reward  
36  
37 interdependence on group performance. *J Organiz Behav* 1997:139–58.  
38  
39  
40 71 LePine JA, Piccolo RF, Jackson CL, Mathieu JE, Saul JR. A meta-analysis of teamwork  
41  
42 processes: tests of a multidimensional model and relationships with team effectiveness  
43  
44 criteria. *Pers Psychol* 2008;61:273–307.  
45  
46  
47 72 Maynard MT, Kennedy DM, Sommer SA. Team adaptation: A fifteen-year synthesis  
48  
49 (1998–2013) and framework for how this literature needs to “adapt” going forward.  
50  
51 *European Journal of Work and Organizational Psychology* 2015;24:1–26.  
52  
53  
54 73 Edmondson AC. Teaming: How organizations learn, innovate, and compete in the  
55  
56  
57  
58  
59  
60



- 1  
2  
3 knowledge economy. San Francisco, CA: Jossey-Bass; 2012.  
4  
5  
6 74 Edmondson AC, Lei Z. Psychological safety: The history, renaissance, and future of an  
7  
8 interpersonal construct. *Annu Rev Organ Psychol Organ Behav* 2014;1:23–43.  
9  
10 75 Henrickson Parker, S., Schmutz, J. B., & Manser, T. Training needs for adaptive  
11  
12 coordination: Utilizing task analysis to identify coordination requirements in three  
13  
14 different clinical settings. *Gr & Org Manag* 2018;43:504-527.  
15  
16  
17 76 Eppich WJ, Mullan PC, Brett-Fleegler M, Cheng A. “Let's Talk About It”: Translating  
18  
19 Lessons From Health Care Simulation to Clinical Event Debriefings and Coaching  
20  
21 Conversations. *Clinical Pediatric Emergency Medicine* 2016;17:200–11.  
22  
23  
24 77 Schmutz JB, Eppich WJ. Promoting learning and patient care through shared reflection:  
25  
26 A conceptual framework for team reflexivity in healthcare. *Acad Med* 2017;92:1555–  
27  
28 63.  
29  
30  
31 78 Salas E, DiazGranados D, Weaver SJ, King H. Does Team Training Work? Principles  
32  
33 for Health Care. *Acad Emerg Med* 2008;15:1002–9.  
34  
35  
36 79 Amacher SA, Schumacher C, Legeret C, et al. Influence of Gender on the Performance  
37  
38 of Cardiopulmonary Rescue Teams: A Randomized, Prospective Simulator Study. *Crit*  
39  
40 *Care Med* 2017.  
41  
42  
43 80 Burtscher MJ, Kolbe M, Wacker J, et al. Interactions of team mental models and  
44  
45 monitoring behaviors predict team performance in simulated anesthesia inductions. *J*  
46  
47 *Exp Psychol Appl* 2011;17:257–69.  
48  
49  
50 81 Burtscher MJ, Manser T, Kolbe M, et al. Adaptation in anaesthesia team coordination in  
51  
52 response to a simulated critical event and its relationship to clinical performance. *Br J*  
53  
54 *Anaesth* 2011;106:801–6.  
55  
56  
57  
58  
59

- 1  
2  
3 82 Burtscher MJ, Wacker J, Grote G, et al. Managing nonroutine events in anesthesia: the  
4 role of adaptive coordination. *Hum Factors* 2010;52:282–94.  
5  
6  
7  
8 83 Cooper S, Wakelam A. Leadership of resuscitation teams: “Lighthouse Leadership.”  
9  
10 *Resuscitation* 1999;42:27–45.  
11  
12 84 Davenport DL, Henderson WG, Mosca CL, et al. Risk-adjusted morbidity in teaching  
13 hospitals correlates with reported levels of communication and collaboration on surgical  
14 teams but not with scale measures of teamwork climate, safety climate, or working  
15 conditions. *J Am Coll Surg* 2007;205:778–84.  
16  
17  
18  
19  
20  
21 85 El Bardissi AW, Wiegmann DA, Henrickson S, et al. Identifying methods to improve  
22 heart surgery: an operative approach and strategy for implementation on an  
23 organizational level. *Eur J Cardiothorac Surg* 2008;34:1027–33.  
24  
25  
26  
27  
28 86 Gillespie BM, Chaboyer W, Fairweather N. Factors that influence the expected length  
29 of operation: results of a prospective study. *BMJ Qual Saf* 2012;21:3–12.  
30  
31  
32  
33 87 Kolbe M, Burtscher MJ, Wacker J, et al. Speaking Up Is Related to Better Team  
34 Performance in Simulated Anesthesia Inductions: An Observational Study. *Anesth*  
35 *Analg* 2012.  
36  
37  
38  
39  
40 88 Künzle B, Zala-Mezo E, Wacker J. Leadership in anaesthesia teams: the most effective  
41 leadership is shared. *Qual Saf Health Care* 2010;19:1–6.  
42  
43  
44  
45 89 Manojlovich M, DeCicco B. Healthy Work Environments, Nurse-Physician  
46 Communication, and Patients Outcomes. *Am J Crit Care* 2007;16:536–43.  
47  
48  
49 90 Marsch SCU, Müller C, Marquardt K, et al. Human factors affect the quality of  
50 cardiopulmonary resuscitation in simulated cardiac arrests. *Resuscitation* 2004;60:51–6.  
51  
52  
53  
54 91 Mazzocco K, Petitti DB, Fong KT, et al. Surgical team behaviors and patient outcomes.  
55  
56  
57  
58  
59  
60

- 1  
2  
3 *Am J Surg* 2009;197:678–85.  
4  
5 92 Mishra A, Catchpole K, Dale T, et al. The influence of non-technical performance on  
6 technical outcome in laparoscopic cholecystectomy. *Surg Endosc* 2007;22:68–73.  
7  
8  
9  
10 93 Schmutz J, Hoffmann F, Heimberg E, et al. Effective coordination in medical  
11 emergency teams: The moderating role of task type. *Europ J Work Org Psych*  
12 2015;24:761–76.  
13  
14  
15  
16  
17 94 Siassakos D, Bristowe K, Draycott TJ, et al. Clinical Efficiency in a Simulated  
18 Emergency and Relationship to Team Behaviors: A Multisite Cross-sectional Study.  
19 *Obstet Anesth Digest* 2012;32:41.  
20  
21  
22  
23  
24 95 Siassakos D, Fox R, Crofts JF, et al. The management of a simulated emergency: Better  
25 teamwork, better performance. *Resuscitation*  
26  
27  
28  
29 96 Thomas EJ, Sexton JB, Lasky RE, et al. Teamwork and quality during neonatal care in  
30 the delivery room. *J Perinatol* 2006;26:163–9.  
31  
32  
33 97 Tschan F, Semmer NK, Gautschi, et al. Leading to Recovery: Group Performance and  
34 Coordinative Activities in Medical Emergency Driven Groups. *Hum Perf* 2006;19:277–  
35 304.  
36  
37  
38  
39  
40 98 Tschan F, Semmer NK, Gurtner A, et al. Explicit reasoning, confirmation bias, and  
41 illusory transactive memory: A simulation study of group medical decision making.  
42 *Small Group Res* 2009;40:271–300.  
43  
44  
45  
46  
47 99 Westli H, Johnsen B, Eid J, et al. Teamwork skills, shared mental models, and  
48 performance in simulated trauma teams: an independent group design. *Scand J Trauma*  
49 *Resusc Emerg Med* 2010;18:47.  
50  
51  
52  
53  
54 100 Wiegmann DA, ElBardissi AW, Dearani JA. Disruptions in surgical flow and their  
55  
56  
57  
58  
59

- 1  
2  
3 relationship to surgical errors: an exploratory investigation. *Surgery* 2007;142:658–65.  
4  
5 101 Williams AL, Lasky RE, Dannemiller JL, et al. Teamwork behaviours and errors during  
6 neonatal resuscitation. *Qual Saf Health Care* 2010;19:60–4.  
7  
8 102 Wright MC, Phillips-Bute BG, Petrusa ER et al. Assessing teamwork in medical  
9 education and practice: relating behavioural teamwork ratings and clinical performance.  
10  
11 *Med Teach* 2009;31:30–8.  
12  
13 103 Yamada NK, Fuerch JH, Halamek LP. Impact of standardized communication  
14 techniques on errors during simulated neonatal resuscitation. *AM J Perinatol*  
15 2016;33:385–92.  
16  
17  
18  
19  
20  
21  
22  
23  
24  
25  
26  
27  
28  
29  
30  
31  
32  
33  
34  
35  
36  
37  
38  
39  
40  
41  
42  
43  
44  
45  
46  
47  
48  
49  
50  
51  
52  
53  
54  
55  
56  
57  
58  
59  
60

Table 1. Descriptions of study objectives, settings and description of teamwork process and outcome measures

| Authors                                     | Year | Main study objectives                                                                                                            | Participants and setting                                                                                                                                                | Teamwork process measure                                                                                                        | Outcome measure                                                              |
|---------------------------------------------|------|----------------------------------------------------------------------------------------------------------------------------------|-------------------------------------------------------------------------------------------------------------------------------------------------------------------------|---------------------------------------------------------------------------------------------------------------------------------|------------------------------------------------------------------------------|
| Amacher, Schumacher, Legeret, et al.[79]    | 2017 | To compare female and male rescuers in regard to cardiopulmonary resuscitation and leadership performance                        | Video observation of medical students managing cardiopulmonary resuscitation in a high-fidelity patient simulator                                                       | Structured observation of secure leadership statements within teams                                                             | Time until start chest compression<br>Hands-on time within first 180 seconds |
| Brogaard, Kierkegaard, Hvidmand, et al.[59] | 2018 | To investigate the relationship between non-technical skills and clinical performance in obstetric teams                         | Video observation of obstetric teams (Obstetricians, obstetric nurse, anaesthesiologists) managing real-life emergencies (postpartum haemorrhage)                       | Assessment of non-technical skills using a behaviourally anchored rating scale (ATOP; Assessment of Obstetric Team Performance) | Checklist tool for clinical performance (TeamOBS-PPH)                        |
| Burtscher, Kolbe, Wacker, et al.[80]        | 2011 | To investigate how team mental models and team monitoring behaviour interact to predict team performance in anaesthesia          | Video observation of anaesthesia teams (residents, nurses) conducting a standard anaesthesia induction using a high-fidelity patient simulator                          | Structured observation of team monitoring behaviour                                                                             | Checklist based expert rating                                                |
| Burtscher, Manser, Kolbe, et al.[81]        | 2011 | To investigate the relationship between adaptation of team coordination and clinical performance in response to a critical event | Video observation of anaesthesia teams (resident, nurse) conducting a standard anaesthesia induction including a critical event using a high-fidelity patient simulator | Structured observation of team coordination                                                                                     | Reaction time related to the critical event                                  |
| Burtscher, Wacker, Grote, et al.[82]        | 2010 | To examine the role of anaesthesia teams' adaptive coordination in managing changing situational demands                         | Video observation of anaesthesia teams (residents, nurses, students) conducting standard anaesthesia inductions with non-routine events                                 | Structured observation of team coordination                                                                                     | Checklist based expert rating                                                |

|    |                      |      |                                |                                  |                          |                     |
|----|----------------------|------|--------------------------------|----------------------------------|--------------------------|---------------------|
| 1  |                      |      |                                |                                  |                          |                     |
| 2  |                      |      |                                |                                  |                          |                     |
| 3  | Carlson, Min,        | 2009 | To explore the relationship    | Video observation of trainees    | Assessment of team       | Checklist based     |
| 4  | Bridges[9]           |      | between team behaviour and     | participating in a simulated     | behaviour using a        | expert rating       |
| 5  |                      |      | the delivery of an appropriate | event involving the presentation | behaviourally            |                     |
| 6  |                      |      | standard of care specific to   | of acute dyspnoea                | anchored rating scale    |                     |
| 7  |                      |      | the simulated case             |                                  | (leadership and team     |                     |
| 8  |                      |      |                                |                                  | behaviour                |                     |
| 9  |                      |      |                                |                                  | measurement tool)        |                     |
| 10 | Catchpole, Giddings, | 2007 | To investigate if effective    | Live observation of surgical     | Observation of non-      | Assessment of minor |
| 11 | Wilkinson, et        |      | teamwork can prevent the       | teams conducting paediatric      | technical skills using a | problems,           |
| 12 | al.[61]              |      | development of serious         | cardiac and orthopaedic          | behaviourally            | intraoperative      |
| 13 |                      |      | situations and provide         | surgeries                        | anchored rating scale    | performance and     |
| 14 |                      |      | evidence for improvements in   |                                  | (NOTECHS scoring         | duration of surgery |
| 15 |                      |      | training and systems           |                                  | system)                  |                     |
| 16 | Catchpole, Mishra,   | 2008 | To analyse the effects of      | Observation of surgical teams    | Observation of non-      | Operating time and  |
| 17 | Handa, et al.[62]    |      | surgical, aesthetic, and       | conducting laparoscopic          | technical skills using a | errors in surgical  |
| 18 |                      |      | nursing teamwork skills on     | cholecystectomies and carotid    | behaviourally            | technique           |
| 19 |                      |      | technical outcomes             | endarterectomies                 | anchored rating scale    |                     |
| 20 |                      |      |                                |                                  | (NOTECHS scoring         |                     |
| 21 |                      |      |                                |                                  | system)                  |                     |
| 22 | Cooper,              | 1999 | To examine the relationship    | Video observation of emergency   | Survey about leadership  | Checklist based     |
| 23 | Wakelam[83]          |      | between leadership behaviour,  | teams managing full              | behaviour using the      | expert rating       |
| 24 |                      |      | team dynamics and task         | cardiopulmonary arrests with a   | Leadership Behaviour     |                     |
| 25 |                      |      | performance                    | resuscitation attempt lasting    | Description              |                     |
| 26 |                      |      |                                | longer than 3 minutes            | Questionnaire            |                     |
| 27 | Davenport,           | 2007 | To measure the impact of       | Survey of staff on general and   | Survey about teamwork    | Surgical morbidity  |
| 28 | Henderson,           |      | organizational climate safety  | vascular surgery services        | climate, level of        | Surgical mortality  |
| 29 | Mosca, et al.[84]    |      | factors on risk-adjusted       |                                  | communication and        |                     |
| 30 |                      |      | surgical morbidity and         |                                  | collaboration with       |                     |
| 31 |                      |      | mortality                      |                                  | surgeon                  |                     |
| 32 | El Bardissi,         | 2008 | To identify patterns of        | Live observation of surgical     | Structured observation   | Surgical technical  |
| 33 | Wiegmann,            |      | teamwork failures that would   | teams conducting cardiac         | of teamwork failures     | errors              |
| 34 | Henrickson, et       |      | benefit from intervention in   | surgery                          | that disrupted the flow  |                     |
| 35 | al.[85]              |      | the cardiac surgical setting   |                                  | of the operation         |                     |
| 36 |                      |      |                                |                                  |                          |                     |
| 37 | Gillespie, Chaboyer, | 2012 | To investigate how various     | Live observation of surgical     | Structured observation   | Deviation from      |
| 38 | Fairweather[86]      |      | human factors variables,       | teams across 10 specialties      | of numbers of            | expected length of  |
| 39 |                      |      | extend the expected length of  |                                  | communication            | operation           |
| 40 |                      |      | an operation                   |                                  | failures                 |                     |
| 41 |                      |      |                                |                                  |                          |                     |
| 42 |                      |      |                                |                                  |                          |                     |
| 43 |                      |      |                                |                                  |                          |                     |
| 44 |                      |      |                                |                                  |                          |                     |
| 45 |                      |      |                                |                                  |                          |                     |
| 46 |                      |      |                                |                                  |                          |                     |
| 47 |                      |      |                                |                                  |                          |                     |

|    |                     |      |                                  |                                    |                         |                       |
|----|---------------------|------|----------------------------------|------------------------------------|-------------------------|-----------------------|
| 1  |                     |      |                                  |                                    |                         |                       |
| 2  |                     |      |                                  |                                    |                         |                       |
| 3  | Kolbe, Burtscher,   | 2012 | To test the relationship between | Observation of 2-person (nurse,    | Structured observation  | Checklist based       |
| 4  | Wacker, et al.[87]  |      | speaking up and technical        | resident) ad hoc anaesthesia       | of speaking up          | expert rating         |
| 5  |                     |      | team performance in              | teams performing simulated         | behaviour               |                       |
| 6  |                     |      | anaesthesia.                     | inductions of general              |                         |                       |
| 7  |                     |      |                                  | anaesthesia with minor             |                         |                       |
| 8  |                     |      |                                  | nonroutine events                  |                         |                       |
| 9  | Kuenzle, Zala-Mezo, | 2009 | To investigate shared leadership | Observation of 2-person (nurse,    | Structured observation  | Reaction time to      |
| 10 | Wacker, et al.[88]  |      | patterns during anaesthesia      | resident) ad hoc anaesthesia       | of leadership           | nonroutine event      |
| 11 |                     |      | induction and to show how        | teams performing simulated         | behaviour               |                       |
| 12 |                     |      | they are linked to team          | inductions of general              |                         |                       |
| 13 |                     |      | performance                      | anaesthesia with a nonroutine      |                         |                       |
| 14 |                     |      |                                  | event (asystole)                   |                         |                       |
| 15 | Manojilovich,       | 2009 | To determine the relationships   | A survey was conducted with        | Survey about perception | Ventilator-associated |
| 16 | Antonakos, David,   |      | between patients' outcomes       | nurses on various ICU wards        | of nurse-physician      | pneumonia             |
| 17 | et al.[89]          |      | and nurses' perceptions of       |                                    | communication using     | Bloodstream           |
| 18 |                     |      | communication and                |                                    | the ICU-nurse           | infections            |
| 19 |                     |      | characteristics of the practice  |                                    | physician               | Pressure ulcers       |
| 20 |                     |      | environment.                     |                                    | questionnaire           | Acute physiology and  |
| 21 |                     |      |                                  |                                    |                         | chronic health        |
| 22 |                     |      |                                  |                                    |                         | evaluation score      |
| 23 | Manser, Bogdanovic, | 2015 | To investigate surgeons team     | Live observation of surgical       | Structured observation  | Checklist based       |
| 24 | Clack, et al. [60]  |      | management skills and its        | teams managing a simulated         | of team management      | expert rating         |
| 25 |                     |      | influence on performance         | laparoscopic cholecystectomy       | using the ComEd-E       |                       |
| 26 |                     |      |                                  |                                    | observation system      |                       |
| 27 | Marsch, Müller,     | 2004 | To determine whether and how     | Observation of healthcare worker   | Structured observation  | Checklist based       |
| 28 | Marquardt, et       |      | human factors affect the         | (nurse, physician) managing a      | of task distribution,   | expert rating         |
| 29 | al.[90]             |      | quality of cardiopulmonary       | cardiac arrest due to ventricular  | information transfer    |                       |
| 30 |                     |      | resuscitation                    | fibrillation using a high-fidelity | and leadership          |                       |
| 31 |                     |      |                                  | patient simulator                  | behaviour within the    |                       |
| 32 |                     |      |                                  |                                    | team                    |                       |
| 33 | Mazzocco, Petitti,  | 2009 | To determine if patients of      | Live observation of surgical       | Structured observation  | Postoperative         |
| 34 | Fong, et al.[91]    |      | teams with good teamwork         | teams managing a variety of        | of information sharing, | complications and     |
| 35 |                     |      | had better outcomes than         | surgical procedures                | inquiry for relevant    | death                 |
| 36 |                     |      | those with poor teamwork         |                                    | information and         |                       |
| 37 |                     |      |                                  |                                    | vigilance and           |                       |
| 38 |                     |      |                                  |                                    | awareness using a       |                       |
| 39 |                     |      |                                  |                                    | behaviourally           |                       |
| 40 |                     |      |                                  |                                    | anchored rating scale   |                       |
| 41 |                     |      |                                  |                                    |                         |                       |
| 42 |                     |      |                                  |                                    |                         |                       |
| 43 |                     |      |                                  |                                    |                         |                       |
| 44 |                     |      |                                  |                                    |                         |                       |
| 45 |                     |      |                                  |                                    |                         |                       |
| 46 |                     |      |                                  |                                    |                         |                       |
| 47 |                     |      |                                  |                                    |                         |                       |

|    |                      |      |                                 |                                   |                          |                      |
|----|----------------------|------|---------------------------------|-----------------------------------|--------------------------|----------------------|
| 1  |                      |      |                                 |                                   |                          |                      |
| 2  |                      |      |                                 |                                   |                          |                      |
| 3  | Mishra, Catchpole,   | 2008 | To report on the development    | Live observation of surgical      | Assessment of non-       | Surgical technical   |
| 4  | Dale, et al.[92]     |      | and evaluation of a method      | teams conducting laparoscopic     | technical skills using a | errors assessed      |
| 5  |                      |      | for measuring operating-        | cholecystectomy                   | behaviourally            | with the OCHRA-      |
| 6  |                      |      | theatre teamwork quality        |                                   | anchored rating scale    | tool                 |
| 7  |                      |      |                                 |                                   | (NOTECHS scoring         |                      |
| 8  |                      |      |                                 |                                   | system)                  |                      |
| 9  | Schmutz, Hoffmann,   | 2015 | To investigate the moderating   | Video observation of paediatric   | Structured observation   | Checklist based      |
| 10 | Heimberg, et         |      | effect of task characteristics  | teams managing various            | of closed loop           | expert rating        |
| 11 | al.[93]              |      | on the relationship between     | paediatric emergencies using a    | communication, task      |                      |
| 12 |                      |      | coordination and performance    | high-fidelity patient simulator   | distribution and         |                      |
| 13 |                      |      |                                 |                                   | provide information      |                      |
| 14 |                      |      |                                 |                                   | without request using    |                      |
| 15 |                      |      |                                 |                                   | the CoMeT-E              |                      |
| 16 |                      |      |                                 |                                   | observation system       |                      |
| 17 | Siassakos, Bristowe, | 2012 | To investigate the relationship | Video observation of teams        | Structured observation   | Timely               |
| 18 | Draycott, et al.[94] |      | between patient satisfaction    | (physicians, midwives)            | of closed loop           | administration of    |
| 19 |                      |      | and communication               | managing obstetric emergencies    | communication            | magnesium            |
| 20 |                      |      |                                 | in secondary and tertiary         |                          | sulphate             |
| 21 |                      |      |                                 | maternity units                   |                          |                      |
| 22 | Siassakos, Fox,      | 2011 | To determine whether team       | Video observation of healthcare   | Assessment of generic    | Clinical efficiency  |
| 23 | Crofts, et al.[95]   |      | performance in a simulated      | professionals (physician,         | teamwork using a         | score                |
| 24 |                      |      | emergency is related to         | midwives) managing various        | behaviourally            |                      |
| 25 |                      |      | generic teamwork skills and     | emergencies using a high-         | anchored rating scale    |                      |
| 26 |                      |      | behaviors                       | fidelity patient simulator        | (teamwork analytical     |                      |
| 27 |                      |      |                                 |                                   | tool)                    |                      |
| 28 | Thomas, Sexton,      | 2006 | To investigate the relationship | Video observation of neonatal     | Structured observation   | Compliance with      |
| 29 | Lasky, et al.[96]    |      | of team behaviours during       | care teams managing a             | of communication,        | Neonatal             |
| 30 |                      |      | delivery room care and          | resuscitation during a caesarean  | team management and      | Resuscitation        |
| 31 |                      |      | behaviours relate to the        | section                           | leadership               | Program guidelines   |
| 32 |                      |      | quality of care                 |                                   |                          |                      |
| 33 | Tschan, Semmer,      | 2006 | To investigate the influence of | Video observation of medical      | Structured observation   | Clinical performance |
| 34 | Gautschi, et al.[97] |      | human factors on team           | emergency teams (senior doctor,   | of directive leadership  | assessed based on a  |
| 35 |                      |      | performance in medical          | resident, nurse) managing a       | and structuring inquiry  | time-based coding    |
| 36 |                      |      | emergency driven groups         | cardiac arrest in a high-fidelity |                          | of observable        |
| 37 |                      |      |                                 | patient simulator                 |                          | technical acts       |
| 38 |                      |      |                                 |                                   |                          |                      |
| 39 |                      |      |                                 |                                   |                          |                      |
| 40 |                      |      |                                 |                                   |                          |                      |
| 41 |                      |      |                                 |                                   |                          |                      |
| 42 |                      |      |                                 |                                   |                          |                      |
| 43 |                      |      |                                 |                                   |                          |                      |
| 44 |                      |      |                                 |                                   |                          |                      |
| 45 |                      |      |                                 |                                   |                          |                      |
| 46 |                      |      |                                 |                                   |                          |                      |
| 47 |                      |      |                                 |                                   |                          |                      |



|    |                       |      |                                 |                                   |                          |                   |
|----|-----------------------|------|---------------------------------|-----------------------------------|--------------------------|-------------------|
| 1  |                       |      |                                 |                                   |                          |                   |
| 2  |                       |      |                                 |                                   |                          |                   |
| 3  | Tschan, Semmer,       | 2009 | To investigate the influence of | Video observation of groups of    | Structured observation   | Accuracy of       |
| 4  | Gurtner, et al.[98]   |      | communication on diagnostic     | physicians diagnosing a difficult | of the diagnostic        | diagnosis         |
| 5  |                       |      | accuracy in ambiguous           | patient with an anaphylactic      | information that have    |                   |
| 6  |                       |      | situations                      | shock in a high-fidelity patient  | been considered,         |                   |
| 7  |                       |      |                                 | simulator                         | explicit reasoning and   |                   |
| 8  |                       |      |                                 |                                   | talking to the room      |                   |
| 9  |                       |      |                                 |                                   |                          |                   |
| 10 | Westli, Johnsen, Eid, | 2010 | To investigate whether          | Video observation of trauma       | Assessment of non-       | Checklist based   |
| 11 | et al.[99]            |      | demonstrated teamwork skills    | teams (surgeons,                  | technical skills using a | expert rating     |
| 12 |                       |      | and behaviour indicating        | anaesthesiologists, nurses,       | behaviourally            |                   |
| 13 |                       |      | shared mental models would      | radiographers) in a high-fidelity | anchored rating scale    |                   |
| 14 |                       |      | be associated with improved     | patient simulator                 | (ANTS and ATOM           |                   |
| 15 |                       |      | medical management              |                                   | scoring system)          |                   |
| 16 | Wiegmann, El          | 2007 | To investigate surgical errors  | Live observation of surgical      | Structured observation   | Structured        |
| 17 | Bardissi, Dearani,    |      | and their relationship to       | teams conducting cardiac          | of teamwork and          | observation of    |
| 18 | et al.[100]           |      | surgical flow disruptions to    | surgery operations                | communication            | surgical errors   |
| 19 |                       |      | understand better the effect of |                                   | failures                 | during the        |
| 20 |                       |      | these disruptions on surgical   |                                   |                          | operation         |
| 21 |                       |      | errors and patient safety       |                                   |                          |                   |
| 22 | Williams, Lasky,      | 2010 | To describe relationships       | Video observation of intensive    | Structured observation   | Structured        |
| 23 | Dannemiller, et       |      | between teamwork                | care teams managing neonatal      | of teamwork behaviour    | observation of    |
| 24 | al.[101]              |      | behaviours and errors during    | resuscitations                    | (vigilance, workload     | errors (non-      |
| 25 |                       |      | neonatal resuscitation          |                                   | management,              | compliance with   |
| 26 |                       |      |                                 |                                   | information sharing,     | guidelines)       |
| 27 |                       |      |                                 |                                   | inquiry, assertion)      |                   |
| 28 | Wright, Phillips-     | 2009 | To test if observer ratings of  | Video observation of teams        | Observation using a      | Checklist based   |
| 29 | Bute, Petrusa, et     |      | team skills will correlate with | consisting of medical students    | behaviourally            | expert rating     |
| 30 | al.[102]              |      | objective measures of clinical  | performing low-fidelity           | anchored rating scale    |                   |
| 31 |                       |      | performance                     | classroom based patient           | for teamwork skills      |                   |
| 32 |                       |      |                                 | assessment and high-fidelity      | (assertiveness,          |                   |
| 33 |                       |      |                                 | simulation emergent care.         | decision-making,         |                   |
| 34 |                       |      |                                 |                                   | situation assessment,    |                   |
| 35 |                       |      |                                 |                                   | leadership,              |                   |
| 36 | Yamada, Fuerch,       | 2016 | To investigate the effect of    | Video observation of teams        | Structured observation   | Error rate        |
| 37 | Halamek[103]          |      | standardized communication      | (Neonatologists, neonatal nurse   | of standardised          | Time to initiate  |
| 38 |                       |      | techniques on errors during     | practitioners, neonatology        | communication            | positive pressure |
| 39 |                       |      | resuscitation                   | fellows) managing neonatal        |                          | ventilation       |
| 40 |                       |      |                                 | resuscitation                     |                          | Time to chest     |
| 41 |                       |      |                                 |                                   |                          | compression       |
| 42 |                       |      |                                 |                                   |                          |                   |
| 43 |                       |      |                                 |                                   |                          |                   |
| 44 |                       |      |                                 |                                   |                          |                   |
| 45 |                       |      |                                 |                                   |                          |                   |
| 46 |                       |      |                                 |                                   |                          |                   |
| 47 |                       |      |                                 |                                   |                          |                   |

Table 2. Studies, effect sizes and moderator variables included in the meta-analytic database

| Authors                                       | Year | Study goal       | Setting            | No. of teams | Professional composition | Team familiarity | Average team size | Task type             | Patient realism | Performance measure |
|-----------------------------------------------|------|------------------|--------------------|--------------|--------------------------|------------------|-------------------|-----------------------|-----------------|---------------------|
| Amacher, Schumacher, Legeret, et al.[79]      | 2017 | .11              | Emergency medicine | 72           | Uniprofessional          | Experimental     | 3                 | Non-routine           | Simulated       | Process             |
| Brogaard, Kierkegaard, Hvidmand, et al.[59]   | 2018 | .43              | Obstetrics         | 99           | Interprofessional        | Real             | 5                 | Non-routine           | Real            | Process             |
| Burtscher, Kolbe, Wacker, et al.[80]          | 2011 | -.27             | Anaesthesia        | 31           | Interprofessional        | Experimental     | 2                 | Routine               | Simulated       | Process             |
| Burtscher, Manser, Kolbe, et al.[81]          | 2011 | .19              | Anaesthesia        | 15           | Interprofessional        | Experimental     | 2                 | Routine & non-routine | Simulated       | Process             |
| Burtscher, Wacker, Grote, et al.[82]          | 2010 | .07              | Anaesthesia        | 22           | Interprofessional        | Real             | 3                 | Non-routine           | Real            | Process             |
| Carlson, Min, Bridges[9] <sup>b</sup>         | 2009 | .83              | Emergency medicine | 44           | Uniprofessional          | Experimental     | 2.6               | Non-routine           | Simulated       | Process             |
| Catchpole, Giddings, Wilkinson, et al.[61]    | 2007 | .45 <sup>†</sup> | Surgery            | 24           | Interprofessional        | Real             | 9                 | Non-routine           | Real            | Process             |
|                                               | 2007 | .29 <sup>†</sup> | Surgery            | 18           | Interprofessional        | Real             | 5                 | Routine               | Real            | Process             |
| Catchpole, Mishra, Handa, et al.[62]          | 2008 | .36 <sup>†</sup> | Surgery            | 26           | Interprofessional        | Real             |                   | Routine               | Real            | Process             |
|                                               | 2008 | .09 <sup>†</sup> | Surgery            | 22           | Interprofessional        | Real             |                   | Routine               | Real            | Process             |
| Cooper, Wakelam[83]                           | 1999 | .50              | General care       | 20           | Interprofessional        | Real             | 4                 | Routine               | Real            | Process             |
| Davenport, Henderson, Mosca, et al.[84]       | 2007 | .17              | Surgery            | 52           | Interprofessional        | Real             |                   | Routine               | Real            | Outcome             |
| El Bardissi, Wiegmann, Henrickson, et al.[85] | 2008 | .67              | Surgery            | 31           | Interprofessional        | Real             | 7                 | Routine               | Real            | Process             |
| Gillespie, Chaboyer, Fairweather[86]          | 2012 | .23              | Surgery            | 160          | Interprofessional        | Real             | 6                 | Routine               | Real            | Process             |
| Kolbe, Burtscher, Wacker, et al.[87]          | 2012 | .33              | Anaesthesia        | 31           | Interprofessional        | Real             | 2                 | Non-routine           | Simulated       | Process             |
| Kuenzle, Zala-Mezo, Wacker, et al.[88]        | 2009 | .56              | Anaesthesia        | 12           | Interprofessional        | Real             | 2                 | Routine               | Simulated       | Process             |
| Manojilovich, Antonakos, David, et al.[89]    | 2009 | .11              | Intensive care     | 25           | Uniprofessional          | Real             | 36                | Routine               | Real            | Outcome             |

|    |                                     |      |     |                         |     |                   |              |      |             |           |         |
|----|-------------------------------------|------|-----|-------------------------|-----|-------------------|--------------|------|-------------|-----------|---------|
| 1  |                                     |      |     |                         |     |                   |              |      |             |           |         |
| 2  |                                     |      |     |                         |     |                   |              |      |             |           |         |
| 3  | Manser, Bogdanovic, Clack, et       | 2015 | .39 | Surgery                 | 19  | Interprofessional | Experimental | 5    | Routine     | Simulated | Process |
| 4  | al.[60]                             |      |     |                         |     |                   |              |      |             |           |         |
| 5  | Marsch, Müller, Marquardt, et       | 2004 | .23 | Intensive               | 16  | Interprofessional | Experimental | 3    | Non-routine | Simulated | Process |
| 6  | al.[90]                             |      |     | care                    |     |                   |              |      |             |           |         |
| 7  | Mazzocco, Petitti, Fong, et al.[91] | 2009 | .11 | Surgery                 | 293 | Interprofessional | Real         | 6    | Routine     | Real      | Outcome |
| 8  |                                     |      |     |                         |     |                   |              |      |             |           |         |
| 9  | Mishra, Catchpole, Dale, et         | 2008 | .05 | Surgery                 | 26  | Interprofessional | Real         | 6    | Routine     | Real      | Process |
| 10 | al.[92]                             |      |     |                         |     |                   |              |      |             |           |         |
| 11 | Schmutz, Hoffmann, Heimberg,        | 2015 | .12 | Emergency               | 68  | Interprofessional | Real         | 6    | Non-routine | Simulated | Process |
| 12 | et al.[93]                          |      |     | medicine                |     |                   |              |      |             |           |         |
| 13 | Siassakos, Bristowe, Draycott, et   | 2012 | .66 | Obstetrics              | 19  | Interprofessional | Real         | 6    | Non-routine | Simulated | Process |
| 14 | al.[94]                             |      |     |                         |     |                   |              |      |             |           |         |
| 15 | Siassakos, Fox, Crofts, et al.[95]  | 2011 | .55 | Emergency               | 24  | Interprofessional | Experimental | 6    | Non-routine | Simulated | Process |
| 16 |                                     |      |     | medicine/<br>obstetrics |     |                   |              |      |             |           |         |
| 17 | Thomas, Sexton, Lasky, et al.[96]   | 2006 | .23 | Neonatal                | 132 | Interprofessional | Real         | 5    | Non-routine | Real      | Process |
| 18 |                                     |      |     | care                    |     |                   |              |      |             |           |         |
| 19 | Tschan, Semmer, Gautschi, et        | 2006 | .23 | Emergency               | 21  | Interprofessional | Experimental | 5    | Non-routine | Simulated | Process |
| 20 | al.[97]                             |      |     | medicine                |     |                   |              |      |             |           |         |
| 21 | Tschan, Semmer, Gurtner, et         | 2009 | .37 | Emergency               | 20  | Uniprofessional   | Experimental | 2.65 | Non-routine | Simulated | Outcome |
| 22 | al.[98]                             |      |     | medicine                |     |                   |              |      |             |           |         |
| 23 | Westli, Johnsen, Eid, et al.[99]    | 2010 | .18 | Emergency               | 27  | Interprofessional | Real         | 5.1  | Non-routine | Simulated | Process |
| 24 |                                     |      |     | medicine                |     |                   |              |      |             |           |         |
| 25 | Wiegmann, El Bardissi, Dearani,     | 2007 | .56 | Surgery                 | 31  | Interprofessional | Real         |      | Routine     | Real      | Process |
| 26 | et al.[100]                         |      |     |                         |     |                   |              |      |             |           |         |
| 27 | Williams, Lasky, Dannemiller, et    | 2010 | .18 | Neonatal                | 12  | Interprofessional | Real         | 5    | Non-routine | Real      | Process |
| 28 | al.[101]                            |      |     | care                    |     |                   |              |      |             |           |         |
| 29 | Wright, Phillips-Bute, Petrusa, et  | 2009 | .81 | General care            | 9   | Uniprofessional   | Experimental | 4    | Non-routine | Simulated | Process |
| 30 | al.[102]                            |      |     |                         |     |                   |              |      |             |           |         |
| 31 | Yamada, Fuerch, Halamek[103]        | 2016 | .11 | Emergency               | 13  | Interprofessional | Experimental | 3    | Non-routine | Simulated | Process |
| 32 |                                     |      |     | medicine                |     |                   |              |      |             |           |         |
| 33 |                                     |      |     |                         |     |                   |              |      |             |           |         |

<sup>a</sup> Effect sizes ( $r$ ) with an † represent an average for a single sample and a single outcome and have been combined for this meta-analysis.

<sup>b</sup> Carlson, Min & Bridges has been identified as an outlier and therefore excluded from the analysis

Table 3. Meta-Analytic relationships between teamwork and clinical performance

|                                 | N     | k  | r    | 95% CI       | 80% CR       | Q     | I <sup>2</sup> |
|---------------------------------|-------|----|------|--------------|--------------|-------|----------------|
| Overall relationship            | 1,390 | 31 | .28* | [.20 ; .35]  | [.09 ; .45]  | 53.7* | 46.0           |
| <i>Team characteristics</i>     |       |    |      |              |              |       |                |
| <i>Professional composition</i> |       |    |      |              |              |       |                |
| Interprofessional               | 1,264 | 27 | .28* | [.20 ; .36]  | [.09 ; .46]  | 47.1* | 48.2           |
| Uniprofessional                 | 126   | 4  | .28  | [-.01 ; .52] | [-.04 ; .54] | 6.5   | 47.1           |
| <i>Team familiarity</i>         |       |    |      |              |              |       |                |
| Experimental team               | 240   | 10 | .25* | [.05 ; .43]  | [-.05 ; .51] | 17.2* | 47.2           |
| Real team                       | 1,150 | 21 | .29* | [.20 ; .37]  | [.12 ; .45]  | 36.2* | 45.7           |
| Team size <sup>a</sup>          |       |    |      |              |              |       |                |
| <i>Task characteristics</i>     |       |    |      |              |              |       |                |
| <i>Task type</i>                |       |    |      |              |              |       |                |
| Routine task                    | 766   | 14 | .27* | [.12 ; .40]  | [-.01 ; .50] | 30.9* | 65.0           |
| Non-routine task                | 609   | 16 | .29* | [.20 ; .39]  | [.16 ; .42]  | 20.5  | 24.6           |
| <i>Methodological factors</i>   |       |    |      |              |              |       |                |
| <i>Patient realism</i>          |       |    |      |              |              |       |                |
| Real patient                    | 993   | 16 | .28* | [.18 ; .38]  | [.10 ; .45]  | 28.7* | 49.3           |
| Simulated patient               | 397   | 15 | .28* | [.13 ; .41]  | [.02 ; .50]  | 25.0* | 44.6           |
| <i>Performance measures</i>     |       |    |      |              |              |       |                |
| Outcome performance             | 390   | 4  | .13* | [.03 ; .23]  | [.06 ; .19]  | 1.3   | 0.0            |
| Process performance             | 1,000 | 27 | .30* | [.21 ; .39]  | [.10 ; .49]  | 45.6* | 45.6           |

Note. *k* = number of studies; *N* = cumulative sample size (number of teams); *r* = sample-size weighted correlation; CI = confidence interval; CR = credibility interval; *Q* = test statistic for residual heterogeneity of the models; *I*<sup>2</sup> = % of total variability in the effect size estimates due to heterogeneity among true effects (vs. sampling error)

<sup>a</sup> Team size was entered as a continuous variable, therefore, no subgroup analyses exist

\* *p* < .05.

1  
2  
3  
4  
5  
6  
7  
8  
9  
10  
11  
12  
13  
14  
15  
16  
17  
18  
19  
20  
21  
22  
23  
24  
25  
26  
27  
28  
29  
30  
31  
32  
33  
34  
35  
36  
37  
38  
39  
40  
41  
42  
43  
44  
45  
46  
47  
48  
49  
50  
51  
52  
53  
54  
55  
56  
57  
58  
59  
60

**LEGENDS TO FIGURES**

**Figure 1**      Systematic literature search

**Figure 2**      Relationship between teamwork processes and performance

For peer review only

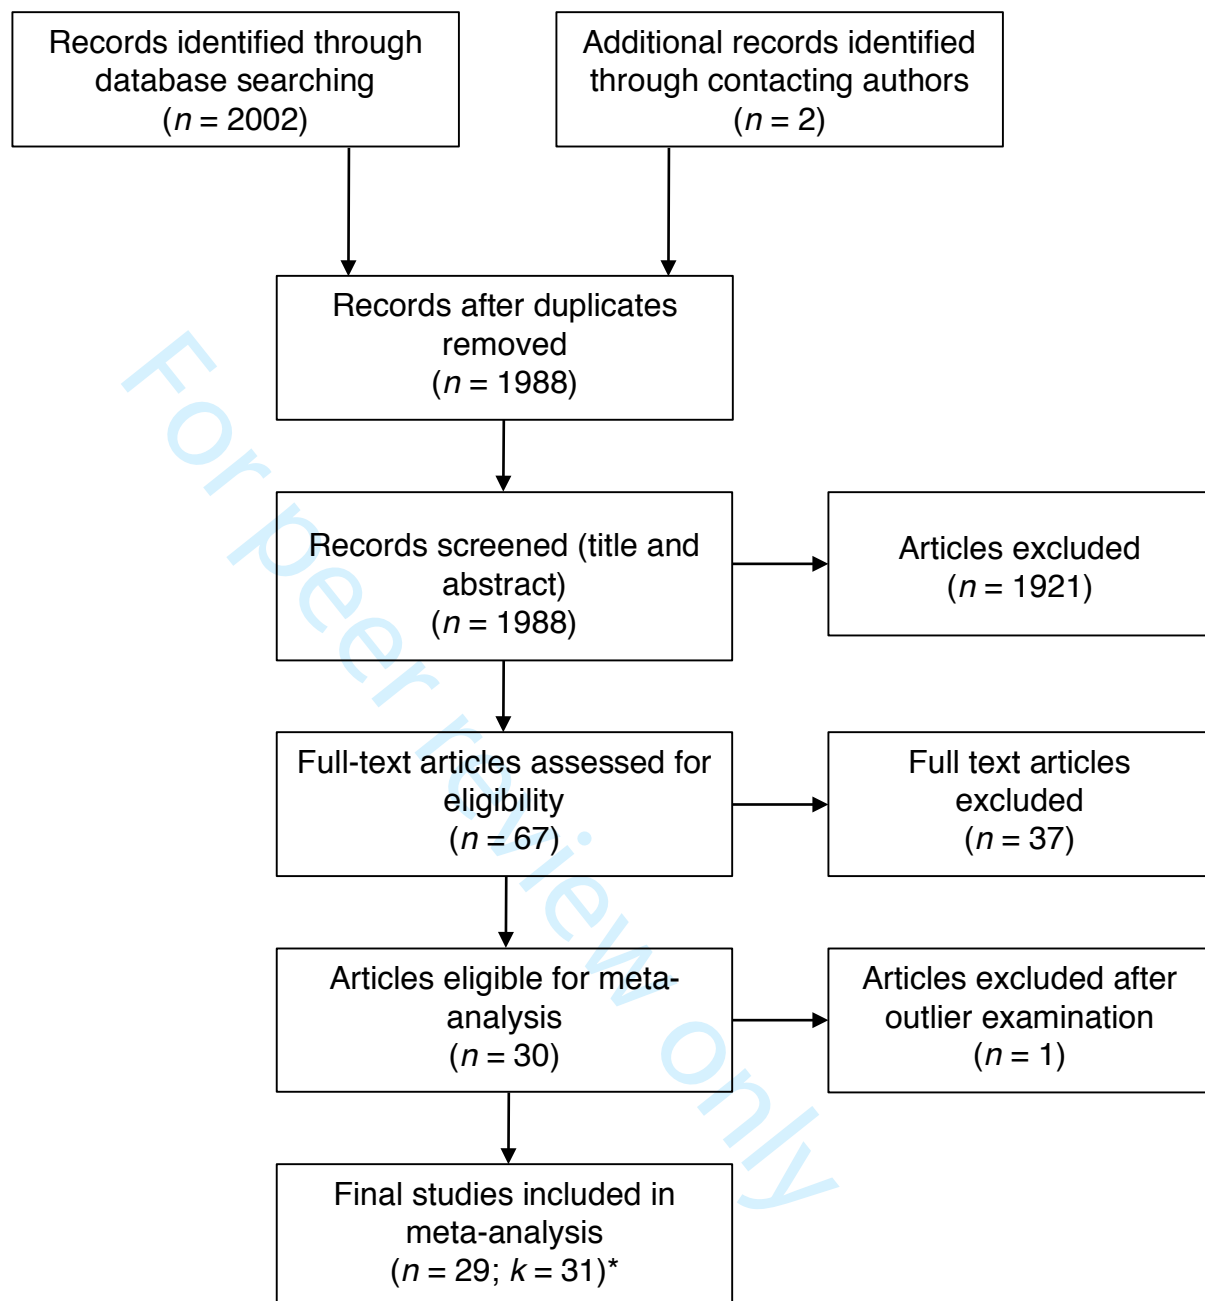

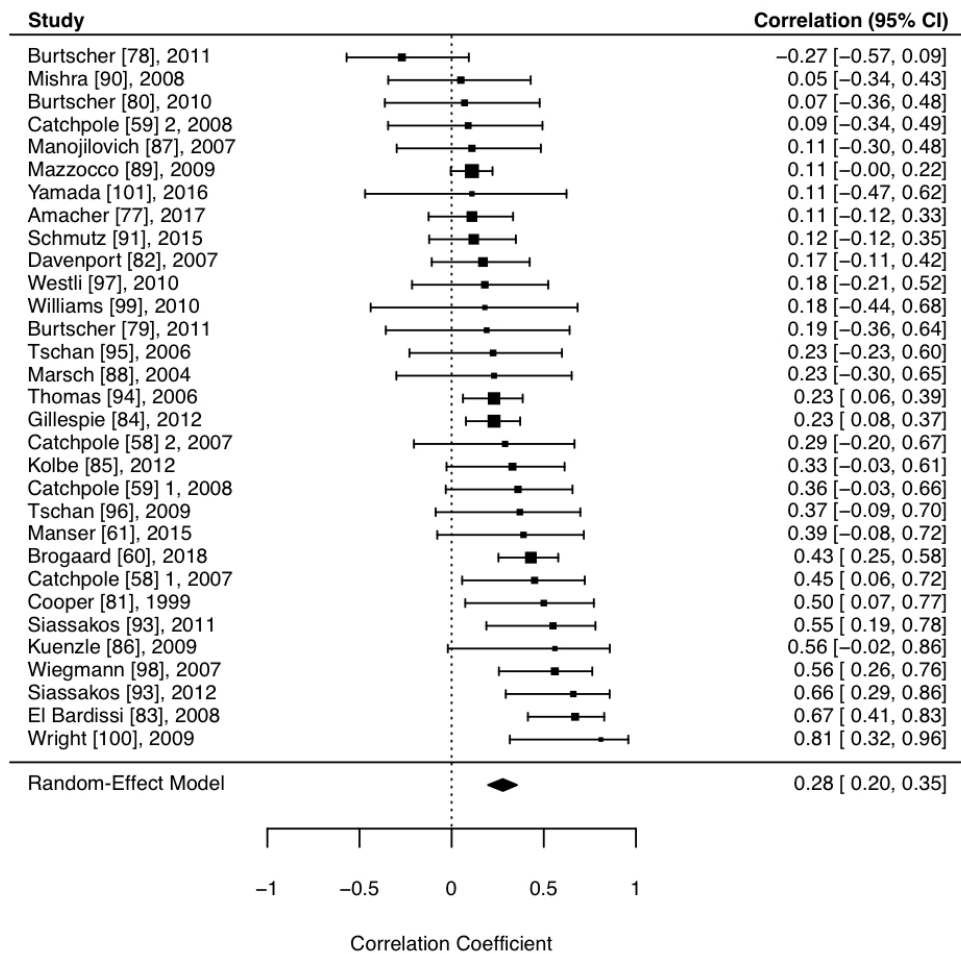

Figure 2. Relationship between teamwork processes and performance.

## SUPPLEMENTARY FILE

Article: **How effective is teamwork really? The relationship between teamwork and performance in healthcare teams: A systematic review and meta-analysis**

Jan B. Schmutz, PhD; Laurenz L. Meier, PhD; Tanja Manser, PhD

### Search terms used for PubMed search

(Teamwork[All Fields]) OR (team[All Fields] AND coordination[All Fields]) OR (team[All Fields] AND "decision making"[All Fields]) OR ((team[All Fields]) AND (communication[MeSH Terms]) OR (communication[All Fields])) OR (team[All Fields] AND leadership[All Fields]) AND (patient safety[MeSH Terms])



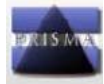

# PRISMA 2009 Checklist

| Section/topic                      | #  | Checklist item                                                                                                                                                                                                                                                                                              | Reported on page #          |
|------------------------------------|----|-------------------------------------------------------------------------------------------------------------------------------------------------------------------------------------------------------------------------------------------------------------------------------------------------------------|-----------------------------|
| <b>TITLE</b>                       |    |                                                                                                                                                                                                                                                                                                             |                             |
| Title                              | 1  | Identify the report as a systematic review, meta-analysis, or both.                                                                                                                                                                                                                                         | 1                           |
| <b>ABSTRACT</b>                    |    |                                                                                                                                                                                                                                                                                                             |                             |
| Structured summary                 | 2  | Provide a structured summary including, as applicable: background; objectives; data sources; study eligibility criteria, participants, and interventions; study appraisal and synthesis methods; results; limitations; conclusions and implications of key findings; systematic review registration number. | 2                           |
| <b>INTRODUCTION</b>                |    |                                                                                                                                                                                                                                                                                                             |                             |
| Rationale                          | 3  | Describe the rationale for the review in the context of what is already known.                                                                                                                                                                                                                              | 4-8                         |
| Objectives                         | 4  | Provide an explicit statement of questions being addressed with reference to participants, interventions, comparisons, outcomes, and study design (PICOS).                                                                                                                                                  | 4-5                         |
| <b>METHODS</b>                     |    |                                                                                                                                                                                                                                                                                                             |                             |
| Protocol and registration          | 5  | Indicate if a review protocol exists, if and where it can be accessed (e.g., Web address), and, if available, provide registration information including registration number.                                                                                                                               | n/a                         |
| Eligibility criteria               | 6  | Specify study characteristics (e.g., PICOS, length of follow-up) and report characteristics (e.g., years considered, language, publication status) used as criteria for eligibility, giving rationale.                                                                                                      | 9-10                        |
| Information sources                | 7  | Describe all information sources (e.g., databases with dates of coverage, contact with study authors to identify additional studies) in the search and date last searched.                                                                                                                                  | 9                           |
| Search                             | 8  | Present full electronic search strategy for at least one database, including any limits used, such that it could be repeated.                                                                                                                                                                               | 9 and supplemental material |
| Study selection                    | 9  | State the process for selecting studies (i.e., screening, eligibility, included in systematic review, and, if applicable, included in the meta-analysis).                                                                                                                                                   | 9-10                        |
| Data collection process            | 10 | Describe method of data extraction from reports (e.g., piloted forms, independently, in duplicate) and any processes for obtaining and confirming data from investigators.                                                                                                                                  | 10                          |
| Data items                         | 11 | List and define all variables for which data were sought (e.g., PICOS, funding sources) and any assumptions and simplifications made.                                                                                                                                                                       | 9-12                        |
| Risk of bias in individual studies | 12 | Describe methods used for assessing risk of bias of individual studies (including specification of whether this was done at the study or outcome level), and how this information is to be used in any data synthesis.                                                                                      | 20                          |
| Summary measures                   | 13 | State the principal summary measures (e.g., risk ratio, difference in means).                                                                                                                                                                                                                               | 13-19 / 23                  |



# PRISMA 2009 Checklist

|                      |    |                                                                                                                                                           |       |
|----------------------|----|-----------------------------------------------------------------------------------------------------------------------------------------------------------|-------|
| Synthesis of results | 14 | Describe the methods of handling data and combining results of studies, if done, including measures of consistency (e.g., $I^2$ ) for each meta-analysis. | 20-23 |
|----------------------|----|-----------------------------------------------------------------------------------------------------------------------------------------------------------|-------|

Page 1 of 2

| Section/topic                 | #  | Checklist item                                                                                                                                                                                           | Reported on page # |
|-------------------------------|----|----------------------------------------------------------------------------------------------------------------------------------------------------------------------------------------------------------|--------------------|
| Risk of bias across studies   | 15 | Specify any assessment of risk of bias that may affect the cumulative evidence (e.g., publication bias, selective reporting within studies).                                                             | 20,26              |
| Additional analyses           | 16 | Describe methods of additional analyses (e.g., sensitivity or subgroup analyses, meta-regression), if done, indicating which were pre-specified.                                                         | 22-23              |
| <b>RESULTS</b>                |    |                                                                                                                                                                                                          |                    |
| Study selection               | 17 | Give numbers of studies screened, assessed for eligibility, and included in the review, with reasons for exclusions at each stage, ideally with a flow diagram.                                          | 21                 |
| Study characteristics         | 18 | For each study, present characteristics for which data were extracted (e.g., study size, PICOS, follow-up period) and provide the citations.                                                             | 18-19              |
| Risk of bias within studies   | 19 | Present data on risk of bias of each study and, if available, any outcome level assessment (see item 12).                                                                                                | 18-19, 20          |
| Results of individual studies | 20 | For all outcomes considered (benefits or harms), present, for each study: (a) simple summary data for each intervention group (b) effect estimates and confidence intervals, ideally with a forest plot. | 13-19              |
| Synthesis of results          | 21 | Present results of each meta-analysis done, including confidence intervals and measures of consistency.                                                                                                  | 23                 |
| Risk of bias across studies   | 22 | Present results of any assessment of risk of bias across studies (see Item 15).                                                                                                                          | 23                 |
| Additional analysis           | 23 | Give results of additional analyses, if done (e.g., sensitivity or subgroup analyses, meta-regression [see Item 16]).                                                                                    | N/A                |
| <b>DISCUSSION</b>             |    |                                                                                                                                                                                                          |                    |
| Summary of evidence           | 24 | Summarize the main findings including the strength of evidence for each main outcome; consider their relevance to key groups (e.g., healthcare providers, users, and policy makers).                     | 24-27              |
| Limitations                   | 25 | Discuss limitations at study and outcome level (e.g., risk of bias), and at review-level (e.g., incomplete retrieval of identified research, reporting bias).                                            | 26-27              |
| Conclusions                   | 26 | Provide a general interpretation of the results in the context of other evidence, and implications for future research.                                                                                  | 27                 |
| <b>FUNDING</b>                |    |                                                                                                                                                                                                          |                    |
| Funding                       | 27 | Describe sources of funding for the systematic review and other support (e.g., supply of data); role of funders for the systematic review.                                                               | 28                 |

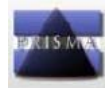

# PRISMA 2009 Checklist

1  
2  
3  
4  
5  
6  
7  
8  
9  
10  
11  
12  
13  
14  
15  
16  
17  
18  
19  
20  
21  
22  
23  
24  
25  
26  
27  
28  
29  
30  
31  
32  
33  
34  
35  
36  
37  
38  
39  
40  
41  
42  
43  
44  
45  
46  
47

*From:* Moher D, Liberati A, Tetzlaff J, Altman DG, The PRISMA Group (2009). Preferred Reporting Items for Systematic Reviews and Meta-Analyses: The PRISMA Statement. PLoS Med 6(6): e1000097. doi:10.1371/journal.pmed1000097

For more information, visit: [www.prisma-statement.org](http://www.prisma-statement.org).

Page 2 of 2

For peer review only

# BMJ Open

## How effective is teamwork really? The relationship between teamwork and performance in healthcare teams: A systematic review and meta-analysis

|                                 |                                                                                                                                                                                                                                                          |
|---------------------------------|----------------------------------------------------------------------------------------------------------------------------------------------------------------------------------------------------------------------------------------------------------|
| Journal:                        | <i>BMJ Open</i>                                                                                                                                                                                                                                          |
| Manuscript ID                   | bmjopen-2018-028280.R3                                                                                                                                                                                                                                   |
| Article Type:                   | Research                                                                                                                                                                                                                                                 |
| Date Submitted by the Author:   | 14-Aug-2019                                                                                                                                                                                                                                              |
| Complete List of Authors:       | Schmutz, Jan B.; Northwestern University, Department of Communication Studies<br>Meier, Laurenz ; University of Neuchâtel , Occupational Psychology and Organizations<br>Manser, Tanja; University of Applied Sciences and Arts Northwestern Switzerland |
| <b>Primary Subject Heading</b>: | Communication                                                                                                                                                                                                                                            |
| Secondary Subject Heading:      | Communication                                                                                                                                                                                                                                            |
| Keywords:                       | teamwork, non-technical skills, communication, meta-analysis, teams                                                                                                                                                                                      |
|                                 |                                                                                                                                                                                                                                                          |

SCHOLARONE™  
Manuscripts

# How effective is teamwork really? The relationship between teamwork and performance in healthcare teams: A systematic review and meta-analysis

**Jan B. Schmutz, PhD**

Researcher at the Department of Communication Studies, Northwestern University, Evanston, USA

Postdoctoral Researcher and Lecturer at the Department of Management, Technology, and Economics, ETH Zurich, Zurich, Switzerland

jan.schmutz@northwestern.edu

**Laurenz L. Meier, PhD**

Professor at the Institute of Work and Organizational Psychology, University of Neuchâtel, Neuchâtel, Switzerland

laurenz.meier@unine.ch

**Tanja Manser, PhD**

Director of the FHNW School of Applied Psychology, University of Applied Sciences and Arts Northwestern Switzerland, Olten, Switzerland

tanja.manser@fhnw.ch

Word count: 4852

Keywords: teamwork, non-technical skills, communication, teams, meta-analysis

## Correspondence to

Jan B. Schmutz  
ATLAS Lab  
Department of Communication Studies  
Northwestern University  
Frances Searle Building 1.220  
2240 Campus Drive  
Evanston, IL 60208  
United States  
Phone 847-491-7023  
jan.schmutz@northwestern.edu

## ABSTRACT

**Objectives** To investigate the relationship between teamwork and clinical performance and potential moderating variables of this relationship.

**Design** Systematic review and meta-analysis.

**Data Source** PubMed was searched in June 2018 without a limit on the date of publication.

Additional literature was selected through a manual backward search of relevant reviews, manual backward and forward search of studies included in the meta-analysis and contacting of selected authors via e-mail.

**Eligibility Criteria** Studies were included if they reported a relationship between a teamwork process (e.g. coordination, non-technical skills) and a performance measure (e.g. checklist based expert rating, errors) in an acute care setting.

**Data Extraction and Synthesis** Moderator variables (i.e. professional composition, team familiarity, average team size, task type, patient realism and type of performance measure) were coded and random-effect models were estimated. Two investigators independently extracted information on study characteristics in accordance with PRISMA guidelines.

**Results** The review identified 2002 articles of which 31 were included in the meta-analysis comprising 1390 teams. The sample-sized weighted mean correlation was  $r = .28$  (corresponding to an odds ratio of 2.8), indicating that teamwork is positively related to performance. The test of moderators was not significant, suggesting that the examined factors did not influence the average effect of teamwork on performance.

**Conclusion** Teamwork has a medium-sized effect on performance. The analysis of moderators illustrated that teamwork relates to performance regardless of characteristics of the team or task.

1  
2  
3  
4  
5  
6  
7  
8  
9  
10  
11  
12  
13  
14  
15  
16  
17  
18  
19  
20  
21  
22  
23  
24  
25  
26  
27  
28  
29  
30  
31  
32  
33  
34  
35  
36  
37  
38  
39  
40  
41  
42  
43  
44  
45  
46  
47  
48  
49  
50  
51  
52  
53  
54  
55  
56  
57  
58  
59  
60

Therefore, healthcare organizations should recognize the value of teamwork and emphasize approaches that maintain and improve teamwork for the benefit of their patients.

For peer review only

## ARTICLE SUMMARY

### Strengths and limitations of this study

- This systematic review evaluates available studies investigating the effectiveness of teamwork processes.
- 31 studies have been included resulting in a substantial sample size of 1390 teams.
- The sample size of the primary studies included is usually low.
- For some subgroup analysis, the number of studies included was small.



## INTRODUCTION

May it be an emergency team in the trauma room, paramedics treating patients after an accident or a surgical team in the operating room, teams are ubiquitous in healthcare and must work across professional, disciplinary and sectorial boundaries. Although the clinical expertise of individual team members is important to ensure high performance, teams must be capable of applying and combining the unique expertise of team members to maintain safety and optimal performance. In order for a team to be effective individual team members need to collaborate and engage in teamwork. Today, experts agree that effective teamwork anchors safe and effective care at various levels of the healthcare systems[1-4] leading to a relatively recent shift towards team research and training.[5-7]

Healthcare is an evidence-based field and therefore administrators and providers are seeking evidence in the literature concerning the impact of teamwork on performance outcomes like patient mortality, morbidity, infection rates or adherence to clinical treatment guidelines. Having a closer look at the literature investigating healthcare teams we find mixed and sometimes even contradicting results about the relationship between teamwork and clinical performance.[8] Some studies find a large effect of teamwork on performance outcomes (e.g. Carlson et al.[9]) while others report small or no relationships.[10,11] This inconsistency arises due to several reasons. First, the conceptual and empirical literature examining teamwork is fragmented and research examining teamwork effectiveness is spread across disciplines including medicine, psychology and organization science. Therefore, researchers and practitioners often lack a common conceptual foundation for investigating teams and teamwork in healthcare. Second, research studies on teamwork in healthcare usually exhibit small sample sizes because of the challenges of recruiting actual professional teams and carefully balancing research with patient

1  
2  
3 care priorities. Small sample sizes, however, increase the likelihood of reporting results that fail  
4  
5 to represent true effect. Third, studies investigating healthcare teams often ignore important  
6  
7 context variables of teams (e.g. team composition and size, task characteristics, team  
8  
9 environment) that likely influence the effect that teamwork has on clinical performance.[12,13]  
10  
11

12 These inconsistencies in the teamwork literature may lead to confusion about the importance  
13  
14 of teamwork in healthcare, thus giving voice to critics who hinder efforts to improve teamwork.  
15  
16 We aim to address these problems with a meta-analytical study investigating the performance  
17  
18 implications of teamwork. A meta-analytical approach moves beyond existing reviews on  
19  
20 teamwork in healthcare[8,14-17] and quantitatively tests if the widely advocated positive effect  
21  
22 of teamwork on performance holds true. In addition, this approach allows us to investigate  
23  
24 context variables as moderators that may influence the effect of teamwork on performance,  
25  
26 meaning that this effect might be stronger or weaker under certain conditions. Previous meta-  
27  
28 analyses[18,19] focused mainly on the effectiveness of team trainings but not on the effect of  
29  
30 teamwork itself. This meta-analysis will generate quantitative evidence to inform the relevance  
31  
32 of future interventions, regulations and policies targeting teamwork in healthcare organizations.  
33  
34  
35  
36

37 In the following we will first establish an operational definition of teamwork, elaborate on  
38  
39 relevant contextual factors, and present our respective meta-analytic results and their  
40  
41 interpretation.  
42  
43  
44  
45  
46

### 47 **Teams, teamwork and team performance**

48

49 In order to clearly understand the impact of teamwork on performance it is necessary to  
50  
51 provide a brief introduction to teams, teamwork and team performance. We define teams as  
52  
53 identifiable social work units consisting of two or more people with several unique  
54  
55  
56  
57  
58  
59  
60

1  
2  
3 characteristics. These characteristics include *a)* dynamic social interaction with meaningful  
4  
5 interdependencies; *b)* shared and valued goals, *c)* a discrete lifespan, *e)* distributed expertise and  
6  
7 *f)* clearly assigned roles and responsibilities.[20,21] Based on this definition it becomes clear that  
8  
9 teams must dynamically share information and resources amongst members and coordinate their  
10  
11 activities in order to fulfil a certain task—in other words teams need to engage in *teamwork*.  
12  
13

14 *Teamwork* as a term is widely used and often difficult to grasp. However, we absolutely  
15  
16 require a clear definition of teamwork especially for team trainings that target specific  
17  
18 behaviours. *Teamwork* is a process that describes interactions among team members who  
19  
20 combine collective resources to resolve task demands (e.g. giving clear orders).[22,23]  
21  
22 Teamwork or team processes can be differentiated from *taskwork*. *Taskwork* denotes a team's  
23  
24 individual interaction with tasks, tools, machines and systems.[23] *Taskwork* is independent of  
25  
26 other team members and is often described as *what* a team is doing whereas *teamwork* is *how* the  
27  
28 members of a team are doing something with each other.[24] Therefore, *team performance*  
29  
30 represents the accumulation of teamwork and taskwork (i.e. what the team actually does).[25]  
31  
32  
33  
34

35 Team performance is often described in terms of inputs, processes and outputs (IPO).[22,26-  
36  
37 28] *Outputs* like quality of care, errors or performance are influenced by team related *processes*  
38  
39 (i.e. teamwork) like communication, coordination or decision making. Furthermore, these  
40  
41 processes are influenced by various *inputs* like team members' experience, task complexity, time  
42  
43 pressure and more. The IPO framework emphasizes the critical role of team processes as the  
44  
45 mechanism by which team members combine their resources and abilities, shaped by the context,  
46  
47 to resolve team task demands. It has been the basis of other more advanced models[27-29] but  
48  
49 has also been criticized because of its simplicity.[30] However, it is still the most popular  
50  
51  
52  
53  
54  
55  
56  
57  
58  
59  
60

1  
2  
3 framework to date and helps to systematize the mechanisms that predict team performance and  
4  
5 represents the basis for the selection of the studies included in our meta-analysis.  
6  
7  
8  
9

### 10 **Contextual factors of teamwork effectiveness**

11  
12 Based on a large body of team research from various domains, we hypothesize that several  
13  
14 contextual and methodological factors might moderate the effectiveness of teamwork, indicating  
15  
16 that teamwork is more important under certain conditions.[31,32] Therefore, we investigate  
17  
18 several factors: (a) team characteristics (i.e. professional composition, team familiarity, team  
19  
20 size); (b) task type (i.e. routine vs. non-routine tasks); (c) two methodological factors related to  
21  
22 patient realism (i.e. simulated vs. real) and the type of performance measures used (i.e. process  
23  
24 vs. outcome performance). In the following we discuss these potentially moderating factors and  
25  
26 the proposed effects on teamwork.  
27  
28  
29

30  
31 *Professional composition.* We distinguished between interprofessional and uniprofessional  
32  
33 teams. Interprofessional teams consist of members from various professions that must work  
34  
35 together in a coordinated fashion.[33] Diverse educational paths in interprofessional teams may  
36  
37 shape respective values, beliefs, attitudes and behaviours.[34] As a result team members with  
38  
39 different backgrounds might perceive and interpret the environment differently and have a  
40  
41 different understanding of how to work together. Therefore, we assume that explicit teamwork is  
42  
43 especially important in interprofessional teams compared to uniprofessional teams.  
44  
45

46  
47 *Team familiarity.* If team members have worked together, they are familiar with their  
48  
49 individual working styles; and roles and responsibilities are usually clear. If a team works  
50  
51 together for the first time, this potential lack of familiarity and clarity might make teamwork  
52  
53 even more important. Therefore, we differentiate between *real teams* that also work together in  
54  
55  
56  
57  
58  
59  
60

1  
2  
3 their everyday clinical practice and *experiential teams* that only came together for study  
4  
5 purposes.  
6

7  
8 *Team size.* Another factor that may moderate the relationship between teamwork and  
9  
10 performance is team size. Since larger teams exhibit more linkages among members than smaller  
11  
12 teams, they also face greater coordination challenges. Also, with increasing size teams have  
13  
14 greater difficulty developing and maintaining role structures and responsibilities. For these  
15  
16 reasons, we expect the influence of teamwork on clinical performance to be stronger in larger  
17  
18 teams as compared to smaller teams.  
19

20  
21 *Task type.* Routine situations are characterized by repetitive and unvarying actions (e.g.  
22  
23 standard anaesthesia induction).[35] In contrast, non-routine situations exhibit more variation  
24  
25 and uncertainty, requiring teams to be flexible and adaptive. Whereas team members mostly rely  
26  
27 on pre-learned sequences during routine situations, during non-routine situations we assume that  
28  
29 teamwork is more important in order for team members to resolve task demands.  
30  
31

32  
33 *Patient realism.* Authors highlight the importance of using medical simulators in  
34  
35 education.[36] Therefore, we investigate the realism used in a study (simulated vs. real patients)  
36  
37 as a potential methodological factor that influences the relationship between teamwork and  
38  
39 performance. Studies conducted with medical simulators might be more standardized and less  
40  
41 influenced by confounding variables than studies conducted with real patients. Therefore, results  
42  
43 from simulation studies might show stronger relationships between the two variables. Further,  
44  
45 using a simulator could cause individuals and teams to act differently than in real settings,  
46  
47 thereby distorting the results. However, in the last decade high-fidelity simulators have become  
48  
49 increasingly realistic, suggesting that the results from simulation studies generalize to real  
50  
51 environments. Including realism as a contextual factor in our analysis will reveal if the effects of  
52  
53  
54  
55  
56  
57  
58  
59  
60

1  
2  
3 teamwork observed in simulation compare with real life settings. Better understanding would  
4  
5 provide important insights about simulation use in teamwork studies.  
6

7  
8 *Performance measures.* As a second methodological factor, we expect that the type of  
9  
10 performance measure used in a study influences the reported teamwork effectiveness. The  
11  
12 literature usually differentiates between process- and outcome-related aspects of  
13  
14 performance.[37,38] Process performance measures are action-related aspects and refer to  
15  
16 adequate behaviour during procedures (e.g. adhering to guidelines), making them easier to  
17  
18 assess. Outcome performance measures (e.g. infection rates after operations) follow team  
19  
20 actions, with assessment occurring later than process measures. Outcome performance measures  
21  
22 suffer from several factors: greater sensitivity to confounding variables (e.g. comorbidities),  
23  
24 assessment challenges, and greater difficulty linking team processes to outcomes. Looking at the  
25  
26 predictors of the survival of cardiac arrest patients illustrates the difference between the two  
27  
28 types of performance measures. The main predictors for the survival (i.e. performance outcome)  
29  
30 of a cardiac arrest patient are “*duration of the arrest*” and “*age of the patient less than 70*”. [39]  
31  
32 Although a team delivers perfect basic life support (i.e. high process performance) the patient  
33  
34 can still die (i.e. low outcome performance). Due to these methodological considerations, we  
35  
36 expect that studies assessing process performance report a stronger relationship between  
37  
38 teamwork and performance than studies assessing outcome performance.  
39  
40  
41  
42  
43  
44  
45  
46  
47  
48  
49  
50  
51  
52  
53  
54  
55  
56  
57  
58  
59  
60

## METHODS

The study was conducted based on the recommendations of the PRISMA statement[40] as well as established guidelines in social sciences.[41,42] Through the combination of studies in the meta-analytical process, we will increase the statistical power and provide an accurate estimation of the true impact that teamwork has on performance.

### Search strategy

We applied the following search strategy to select relevant papers: *a)* an electronic search of the data base PubMed (no limit was placed on the date of publication, last search 19th of June 2018) using the key words *teamwork, coordination, decision making, leadership and communication* in combination with *patient safety, clinical performance*, the final syntax for PubMed is available online (Supplementary File), *b)* a manual backwards search for all references cited by 8 systematic literature reviews that focus on teamwork or non-technical skills in various healthcare domains,[8,15,17,43-47] *c)* a manual backwards search for all references cited in studies we included in our meta-analysis, *d)* a manual forward search using Web of Science to identify studies that cite the studies we included in our meta-analysis, *e)* identification of relevant unpublished manuscripts via e-mail from authors currently investigating medical teams using specific mailing lists.

### Inclusion criteria

Studies were included if a construct complied to the definition of teamwork processes outlined in the introduction (e.g. coordination, communication). In addition, studies needed to investigate the relationship between at least one teamwork process and a performance measure (e.g. patient outcome). When studies reported multiple estimates of the same relationship from

1  
2  
3 the same sample (e.g. between coordination and more than one indicator of performance), those  
4 correlations were examined separately only as appropriate for sub-analyses, but an average  
5 correlation was computed for all global meta-analyses of those relationships to maintain  
6 independence.[41] We excluded articles investigating long-term care since the coordination of  
7 care for chronically ill patients has to consider the unique team task interdependencies in this  
8 setting.[48] Also, teams working together over longer periods of time are more likely to develop  
9 emergent states (e.g. team cohesion) that influence how a specific team works together.[24] All  
10 articles included in this meta-analysis are listed in Table 1 and Table 2.

11  
12  
13  
14  
15  
16  
17  
18  
19  
20  
21  
22 For the criterion level of analysis, we included only effect sizes at the team level and not on  
23 an individual level. Therefore, the performance measure had to be clearly linked to a team. This  
24 approach aligns with research that strongly recommends against mixing levels of analysis in  
25 meta-analytic integrations.[49,50]

26  
27  
28  
29  
30  
31 Two reviewers independently screened titles and abstracts from articles yielded in the search.  
32 Afterwards full texts of all relevant articles were obtained and screened by the same two  
33 reviewers. Agreement was above 90%. Any disagreement in the selection process was resolved  
34 through consensus discussion.

### 35 36 37 38 39 **Data extraction**

40  
41  
42 With the help of a jointly developed coding scheme, studies were independently coded by  
43 one of the authors (JS) and another rater, both with a background in industrial psychology and  
44 human factors. 20% of the studies were rated by both coders. Intercoder agreement was above  
45 90%. Any disagreement was resolved through discussion. The data extracted comprised details  
46 of the authors and publication as well as important study characteristics and statistical  
47 relationships between a teamwork variable and performance (Table 2).  
48  
49  
50  
51  
52  
53  
54  
55  
56  
57  
58  
59  
60



### Coding of team characteristics

The *professional composition* of teams was coded either as “Interprofessional” if a team consisted of members from different professions (e.g. nurses and physicians) or as “Uniprofessional” if the members of the teams were of the same profession. *Team size* was coded as the number of members (average number if team size varied) of the investigated teams. Team familiarity was coded either as “experimental” or “real”. “Real” indicates that the team members also worked together in their everyday clinical practice. “Experimental” means that the teams only worked together during the study.

### Coding of task characteristics

*Task type* was coded either as “Routine task” or “Non-routine task”. We defined “Non-routine tasks” as unexpected events that require flexible behavior often under time-pressure (e.g. emergency situations). “Routine tasks” describe previously planned standard procedures (e.g. standard anesthesia induction, planned surgery).

### Coding of methodological factors

*Patient realism* was either coded as “Real patient” or “Simulated patient”. “Simulated patient” included a patient simulator (manikin) whereas “Real patient” included real patients in clinical settings.

*Clinical performance measures* were coded either as “Outcome performance” or “Process performance”. [38,51] “Outcome performance” includes an outcome that is measured after the treatment process (e.g. infection rate, mortality). We focused only on patient-related outcomes

1  
2  
3 and not on team outcomes (e.g. team satisfaction). “Process performance” describes the  
4  
5 evaluation of the treatment process and describes how well the process was executed (e.g.  
6  
7 adherence to guidelines through expert rating). Process performance measures are often based on  
8  
9 official guidelines and extensive expert knowledge.[52] Thus, we assumed that process  
10  
11 performance closely relates to patient outcomes.  
12  
13

### 14 15 **Statistical Analysis**

16  
17 Different types of effect sizes (e.g. Odds ratio,  $F$  values, and  $r$ ) have been reported in the  
18  
19 original studies. We therefore converted the different effect sizes to a common metric, namely  $r$   
20  
21 using the formulas provided by Borenstein et al.[53] and Walker.[54] Moreover, some samples  
22  
23 contained effect sizes of teamwork with two or more measures of performance. Because  
24  
25 independence of the included effects sizes is required for a meta-analysis,[41,55] we used  
26  
27 Fisher’s  $z$  score to average the multiple correlations from the same sample<sup>1</sup>. The correlations  
28  
29 were weighted for sample size. However, in contrast to many meta-analyses in social sciences,  
30  
31 the correlations were not adjusted for measurement reliability. This is because information about  
32  
33 the measurement reliability could not be compared (Kappa vs. Cronbach Alpha) or were not  
34  
35 available at all for the majority of studies. Therefore, we report uncorrected, sample-size  
36  
37 weighted mean correlation, its 95% confidence interval (CI), and the 80% credibility interval  
38  
39 (CR). The CI reflects the accuracy of a point estimate and can be used to examine the  
40  
41 significance of the effect size estimates, whereas the CR refers to the deviation of these estimates  
42  
43 and informs us about the existence of possible moderators.  
44  
45  
46  
47  
48  
49  
50  
51  
52

---

53  
54 <sup>1</sup> Scholars have suggested to convert  $r$  to Fisher's  $z$  scores, to average the  $z$ 's, and then to backtransform it to  $r$ .  
55 [56] Using simple arithmetic average (i.e., correlations will be summed and divided by the number of coefficients) is  
56 problematic because the distribution of  $r$  becomes negatively skewed as the correlation is larger than zero. As a  
57 result, the average  $r$  tends to underestimate the population correlation.  
58  
59  
60

1  
2  
3 Random-effects models were estimated based on two considerations.[57] First, we expected  
4 study heterogeneity to be high given the different study design characteristics such as *patient*  
5 *realism* (“Real patient” vs. “Simulated patient”), *task type* (“Routine task” vs. “Non-routine  
6 task”), and different forms of performance measures. Second, we aimed to provide an inference  
7 on the average effect in the entire population of studies from which the included studies are  
8 assumed to be a random selection of it. Therefore, random-effects models were estimated.[57]  
9  
10 These models were calculated by the restricted maximum-likelihood estimator, an efficient and  
11 unbiased estimator.[58] Since we included only descriptive studies and no interventions we only  
12 included the sample size of the individual studies as a potential bias into the meta-analysis. To  
13 rule out a potential publication bias, we tested for funnel plot asymmetry using the random-effect  
14 version of the Egger test.[59] The results indicate that there is no asymmetry in the funnel plot ( $z$   
15 = 1.79,  $p = .074$ ), suggesting that there is no publication bias.  
16  
17  
18  
19  
20  
21  
22  
23  
24  
25  
26  
27  
28  
29

30  
31 The estimation of meta-analytical models including the outlier analyses were performed  
32 with the package “metafor” from the programming language and statistical environment R.[58]  
33  
34

### 35 **Patient and public involvement**

36  
37 Patients and public were not involved in this study.  
38  
39  
40  
41  
42  
43

## 44 **RESULTS**

45  
46 The online search resulted in 2002 articles (Figure 1). Two studies were identified via  
47 contacting authors directly and have been presented at conferences in the past.[60,61] After  
48 duplicates were removed 1988 articles were screened using title and abstract. 67 articles were  
49 then selected for a full text review. Full text examination, forward and backward search of  
50  
51  
52  
53  
54  
55  
56  
57  
58  
59  
60

1  
2  
3 selected articles and relevant reviews resulted in 30 studies coming from 28 articles (Two  
4  
5 publications presented two independent studies in one publication[62,63]). This led to a total of  
6  
7 32 studies coming from 30 articles. Following the recommendation by Viechtbauer and Cheung,  
8  
9 [64] we screened for outliers using studentized deleted residuals. One case (Carlson et al.,[9]  $r =$   
10  
11  $.89$ ,  $n = 44$ , studentized deleted residuals = 4.26) was identified as outlier and therefore excluded  
12  
13 from further analyses, resulting in a final sample size of  $k = 31$ .  
14  
15

16  
17 Table 1 provides a qualitative description of the selected articles including study objectives,  
18  
19 the setting in which the studies were carried out and a description of the teamwork processes as  
20  
21 well as the outcome measures that were assessed. If a specific tool for the assessment of a  
22  
23 teamwork process or outcome measure was used this is indicated in the corresponding column.  
24  
25 Observational studies were most prevalent. Teamwork processes were assessed using either  
26  
27 behaviourally anchored rating scales ( $N=8$ ) or structured observation ( $N=19$ ) of specific  
28  
29 teamwork behaviour. Structured observation—as we describe it—is defined as a purely  
30  
31 descriptive assessment of certain behaviour usually using a predefined observation system (e.g.  
32  
33 amount of speaking up behaviour). In contrast, behaviourally anchored rating scales consist of an  
34  
35 evaluation of teamwork process behaviour by an expert. Only three studies used surveys to  
36  
37 assess teamwork behaviours. The majority of the studies ( $N=27$ ) assessed process performance  
38  
39 using either a checklist-based expert rating or assessing a reaction time measure after the  
40  
41 occurrence of a certain event (e.g. time until intervention). Only four studies assessed outcome  
42  
43 performance measures. Measures included accuracy of diagnosis, postoperative complications  
44  
45 and death, surgical morbidity and mortality, ventilator-associated pneumonia, bloodstream  
46  
47 infections, pressure ulcers and acute physiology and chronic health evaluation score. Table 2  
48  
49  
50  
51  
52  
53  
54  
55  
56  
57  
58  
59  
60

1  
2  
3 provides an overview of all variables included in the meta-analysis including the effect sizes and  
4  
5 moderator variables.  
6  
7  
8  
9

### 10 **Effect of teamwork and contextual factors**

11  
12 Table 3 and Figure 2 shows the relationship between teamwork and team performance.  
13  
14 The sample-sized weighted mean correlation was .28 (95% CI: .20 to .35,  $z = 6.55$ ,  $p < .001$ ),  
15  
16 indicating that teamwork is positively related to clinical performance. Results further indicated  
17  
18 heterogeneous effect size distributions across the included samples ( $Q = 53.73$ ,  $p < .05$ ,  $I^2 =$   
19  
20 45.96), signifying that the variability across the sample effect sizes was more than what would be  
21  
22 expected from sampling error alone.  
23  
24  
25

26 To test for moderator effects of the contextual factors, we conducted mixed-effects  
27  
28 models including the mentioned moderators: *professional composition*, *team familiarity*, *team*  
29  
30 *size*, *task type*, *patient realism* and *performance measures*.  
31  
32

33 The omnibus test of moderators was not significant ( $F = 0.18$ ,  $df_1 = 6$ ,  $df_2 = 18$ ,  $p > .20$ ),  
34  
35 suggesting that the examined contextual factors did not influence the average effect of teamwork  
36  
37 on clinical performance. To provide greater detail about the role of the contextual factors, we  
38  
39 conducted separate analyses for the categorical contextual factors and report them in Table 3.  
40  
41  
42  
43  
44  
45  
46  
47  
48  
49  
50  
51  
52  
53  
54  
55  
56  
57  
58  
59  
60

## DISCUSSION

With this study, we aimed to provide evidence for the performance implications of teamwork in healthcare teams. By including various contextual factors, we investigated potential contingencies that these factors might have on the relationship between teamwork and clinical performance. The analysis of 1390 teams from 31 different studies showed that teamwork has a medium sized effect ( $r=.28$ ; [65,66]) on clinical performance across various care settings. Our study is the first to investigate this relationship quantitatively with a meta-analytical procedure. This finding aligns with and advances previous work that explored this relationship in a qualitative way.[8,15,17,43-47]

At first glance a correlation of  $r=.28$  might not seem very high. However, we would like to highlight that  $r=.28$  is considered a medium sized effect[65,66] and should not be underestimated. To better illustrate what this effect means we transformed the correlation into an odds ratio (OR) of 2.8.[53] Of course, this transformation simplifies the correlation because teamwork and often the outcome measures are not simple dichotomous variables that can be divided into an intervention and control group. However, this transformation illustrates that teams who engage in teamwork processes are 2.8 times more likely to achieve high performance than teams who are not. Looking at the performance measures in our study we see that they either describe patient outcomes (e.g. mortality, morbidity) or are closely related to patient outcomes (e.g. adherence to treatment guidelines). Thus, we consider teamwork a performance-relevant process that needs to be promoted through training and implementation into treatment guidelines and policies.

The included studies used a variety of different measures for clinical performance. This variability resulted from the different clinical contexts in which the studies were carried out.

1  
2  
3 There is no universal measure for clinical performance because the outcome is in most cases  
4 context specific. In surgery, common performance measures are surgical complications,  
5  
6 mortality or morbidity.[67] In anaesthesia, studies often use expert ratings based on checklists to  
7  
8 assess the provision of anaesthesia. Expert ratings are also the common form of performance  
9  
10 assessment in simulator settings where patient outcomes like morbidity or mortality cannot be  
11  
12 measured. Future studies need to be aware that clinical performance measures depend on the  
13  
14 clinical context and that the development of valid performance measures requires considerable  
15  
16 effort and scientific rigor. Guidelines on how to develop performance assessment tools for  
17  
18 specific clinical scenarios exist and need to be accounted for.[52,68,69] Furthermore, depending  
19  
20 on the clinical setting researchers need to evaluate what specific clinical performance measures  
21  
22 are suitable and if and how they can be linked to team processes in a meaningful way.  
23  
24  
25  
26  
27

28 The analysis of moderators illustrates that teamwork is related with performance under a  
29  
30 variety of conditions. Our results suggest that teams in different contexts characterised by  
31  
32 different team constellations, team size and levels of acuity of care all benefit from teamwork.  
33  
34 Therefore, clinicians and educators from all fields should strive to maintain or increase effective  
35  
36 teamwork. In recent years, there has been an upsurge in crisis resource management (CRM).[19]  
37  
38 These trainings focus on team management and implement various teamwork principles during  
39  
40 crisis situations (e.g. emergencies).[70] Our results suggest that team trainings should not only  
41  
42 focus on non-routine situations like emergencies but also on routine situations (e.g. routine  
43  
44 anaesthesia induction, routine surgery) because based on our data teamwork is equally important  
45  
46 in such situations.  
47  
48  
49  
50

51 A closer look at methodological factors of the included studies revealed that the observed  
52  
53 relationship between teamwork and performance in simulation settings does not differ from  
54  
55  
56  
57  
58  
59  
60

1  
2  
3 relationships observed in real settings. Therefore, we conclude that teamwork studies conducted  
4  
5 in simulation settings generalize to real life settings in acute care. Further, the analysis of  
6  
7 different performance measures reveals a trend towards process performance measures being  
8  
9 more strongly related with teamwork than outcome performance measures. A possible  
10  
11 explanation of this finding relates to the difficulty of investigating outcome performance  
12  
13 measures in a manner isolated from other variables. Nevertheless, we still found a significant  
14  
15 relationship between teamwork and objective patient outcomes (e.g. postoperative complications,  
16  
17 bloodstream infections) despite the methodological challenges of measuring outcome  
18  
19 performance and the small number of studies using outcome performance ( $k = 4$ ).  
20  
21  
22  
23

24 Our results are in line with previous meta-analyses investigating the effectiveness of team  
25  
26 training in healthcare.[18,19] Similar to our results, Hughes et al. highlighted the effectiveness of  
27  
28 team trainings under a variety of conditions—irrespective of team composition,[18] simulator  
29  
30 fidelity or patient acuity of the trainee's unit as well as other factors.  
31  
32

33 We were unable to find a moderation of task type in our study, potentially explained by task  
34  
35 interdependence, which reflects the degree to which team members depend on one another for  
36  
37 their effort, information, and resources.[71] A meta-analysis including teams from multiple  
38  
39 industries (e.g. project teams, management teams) found that task interdependence moderates the  
40  
41 relationship between teamwork and performance, demonstrating the importance of teamwork for  
42  
43 highly interdependent team tasks.[72] Most studies included in our analysis focused on rather  
44  
45 short and intense patient care episodes (e.g. a surgery, a resuscitation task) with high task  
46  
47 interdependence, which may explain the high relevance of teamwork for all these teams.  
48  
49  
50  
51  
52  
53  
54  
55  
56  
57  
58  
59  
60



### Limitations and future directions

Despite greater attention to healthcare team research and team training over the last decade, we were only able to identify 32 studies (31 included in the meta-analysis). Of note, over two-thirds of the studies in our analysis emerged in the last 10 years, reflecting the increasing interest in the topic. The rather small number of studies might relate to the difficulties in quantifying teamwork, the considerable theoretical and methodological knowledge required, and the challenges of capturing relevant outcome measures. Also, besides the manual searches of selected articles and reviews and contacting authors in the field we did only search the data base PubMed. PubMed is the most common database to access papers that potentially investigate medical teams and includes approximately 30'000 journals from the field of medicine, psychology and management. We are fairly confident that through the additional inclusion of relevant reviews and forward and backwards search, our results represent an accurate representation of what can be found in the literature.

Future research should build on recent theoretical and applied work[24,26,28,73] about teamwork and use this current meta-analysis as a signpost for future investigations. In order to move our field forward, we must use existing conceptual frameworks[22,24,26] and establish standards for investigating teams and teamwork. This can often only be achieved with interdisciplinary research teams including experts from the medical fields but equally important from health professions education, psychology or communication studies.

Another limitation relates to the unbalanced analysis of subgroups. For example, we only identified four studies that used outcome performance variables compared to 27 using process performance measures. Uneven groups may reduce the power to detect significant differences.

1  
2  
3 Therefore, we encourage future studies to include outcome performance measures despite the  
4  
5 effort required.  
6

7  
8 Finally, more factors may influence the relationship between teamwork and performance that  
9  
10 we were unable to extract from the studies. While we tested for the effects of team familiarity by  
11  
12 comparing experimental teams and real teams, this does not fully capture team member  
13  
14 familiarity. The extent to which team members actually worked together during prior clinical  
15  
16 practice might predict of how effectively they perform together. However, even two people  
17  
18 working in the same ward might actually not have interacted much during patient care depending  
19  
20 on the setting. Also team climate on a ward or in a hospital may be an important predictor of how  
21  
22 well teams work together, especially related to sharing information or speaking up within the  
23  
24 team.[74,75]  
25  
26

27  
28 Finally, the clinical context might play a role in how team members collaborate. In different  
29  
30 disciplines, departments or healthcare institutions different norms and routines exist on how to  
31  
32 work together. Therefore, study results and recommendations about teamwork need to be  
33  
34 interpreted in the light of the respective clinical context. There are empirical indications that a  
35  
36 one-size-fits-all approach might not be suitable and team training efforts cannot ignore the  
37  
38 clinical context, especially the routines and norms about collaboration.[76] We acknowledge that  
39  
40 there might be other factors surrounding healthcare teams that might potentially influence  
41  
42 teamwork and clinical performance. However, in this review we could only extract data that was  
43  
44 reported in the primary studies. Since these were limited in the healthcare contexts studied, the  
45  
46 results might not generalise to long-term care settings or mental health, for example. Future work  
47  
48 needs to consider and also document a broader range of potentially influencing factors.  
49  
50  
51  
52  
53  
54  
55  
56  
57  
58  
59  
60

## Conclusion

The current meta-analysis confirms that teamwork across various team compositions represents a powerful process to improve patient care. Good teamwork can be achieved by joint reflection about teamwork during clinical event debriefings[77,78] as well as team trainings[79] and system improvement. All healthcare organisations should recognise these findings and place continuous efforts into maintaining and improving teamwork for the benefit of their patients.

For peer review only

1  
2  
3 **Funding statement:** This work was funded by the European Society of Anaesthesiology (ESA)  
4 and the Swiss National Science Foundation (SNSF, Grant No. P300P1\_177695). The ESA  
5 provided resources for an additional research assistant helping with literature search and  
6 selection. Part of the salary of JS was funded by the SNSF.  
7  
8  
9

10  
11  
12 **Competing interests:** All authors have completed the Unified Competing Interest form  
13 (available on request from the corresponding author) and declare no support from any  
14 organisation for the submitted work; no financial relationships with any organisations that might  
15 have an interest in the submitted work; no other relationships or activities that could appear to  
16 have influenced the submitted work.  
17  
18  
19  
20  
21  
22

23  
24 **Author contributions:** All authors substantially contributed to this study and were involved in  
25 the study design. JS drafted the paper. LM analysed the data and revised the manuscript for  
26 content. TM revised the manuscript for content and language. All authors approved the final  
27 version.  
28  
29  
30  
31  
32

33 **Ethics approval:** Not required  
34

35 **Acknowledgements:** The authors thank Manuel Stühlinger for his help with study selection and  
36 data extraction and Walter J. Eppich, MD, PhD for a critical review and proof reading the  
37 manuscript.  
38  
39  
40  
41

42 **Data sharing:** Dataset is available from the corresponding author.  
43  
44  
45  
46  
47  
48  
49  
50  
51  
52  
53  
54  
55  
56  
57  
58  
59  
60

**REFERENCE**

- 1 Thomas EJ. Improving teamwork in healthcare: current approaches and the path forward. *BMJ Quality & Safety* 2011;20:647–50.
- 2 Salas E, Rosen MA. Building high reliability teams: progress and some reflections on teamwork training. *BMJ Quality & Safety* 2013;22:369–73.
- 3 Schraag JM, Schouten T, Smit M, Haas F, van der Beek D, van de Ven J, et al. A prospective study of paediatric cardiac surgical microsystems: assessing the relationships between non-routine events, teamwork and patient outcomes. *BMJ Quality & Safety* 2011;20:599–603.
- 4 Williams AL, Lasky RE, Dannemiller JL, Andrei AM, Thomas EJ. Teamwork behaviours and errors during neonatal resuscitation. *BMJ Quality & Safety* 2010;19:60–4.
- 5 Guerlain S, Turrentine FE, Bauer DT, Calland JF, Adams R. Crew resource management training for surgeons: Feasibility and impact. *Cognition, Technology & Work* 2008;10:255–64.
- 6 McCulloch P, Mishra A, Handa A, Dale T, Hirst G, Catchpole K. The effects of aviation-style non-technical skills training on technical performance and outcome in the operating theatre. *Qual Saf Health Care* 2009;18:109–15.
- 7 Yule S, Flin R, Maran N, Youngson G, Mitchell A, Rowley D, et al. Debriefing surgeons on non-technical skills (NOTSS). *Cogn Tech Work* 2007;139:131–274.
- 8 Schmutz J, Manser T. Do team processes really have an effect on clinical performance? A systematic literature review. *Br J Anaesth* 2013;110:529–44.
- 9 Carlson J, Min E, Bridges D. The impact of leadership and team behavior on standard of

- 1  
2  
3 care delivered during human patient simulation: A pilot study for undergraduate medical  
4 students. *Teach Learn Med* 2009;21:24–32.
- 5  
6  
7  
8 10 Mishra A, Catchpole K, McCulloch P. The Oxford NOTECHS System: Reliability and  
9 validity of a tool for measuring teamwork behaviour in the operating theatre. *Qual Saf*  
10 *Health Care* 2009;18:104–8.
- 11  
12  
13  
14 11 Manojlovich M, DeCicco B. Healthy Work Environments, Nurse-Physician  
15 Communication, and Patients Outcomes. *Am J Crit Care* 2007;16:536–43.
- 16  
17  
18  
19 12 Schmutz J, Hoffmann F, Heimberg E, Manser T. Effective coordination in medical  
20 emergency teams: The moderating role of task type. *European Journal of Work and*  
21 *Organizational Psychology* 2015;24:761–76.
- 22  
23  
24  
25  
26 13 Tschan F, Semmer NK, Nägele C, Gurtner A. Task adaptive behavior and performance  
27 in groups. *Group Processes & Intergroup Relations* 2000;3:367–86.
- 28  
29  
30  
31 14 Manser T. Teamwork and patient safety in dynamic domains of healthcare: a review of  
32 the literature. *Acta Anaesthesiol Scand* 2009;53:143–51.
- 33  
34  
35  
36 15 Fernandez Castela E, Russo SG, Riethmüller M, Boos M. Effects of team coordination  
37 during cardiopulmonary resuscitation: A systematic review of the literature. *J Crit Care*  
38 2013;28:504–21.
- 39  
40  
41  
42 16 Dietz AS, Pronovost PJ, Benson KN, Mendez-Tellez PA, Dwyer C, Wyskiel R, et al. A  
43 systematic review of behavioural marker systems in healthcare: what do we know about  
44 their attributes, validity and application? *BMJ Quality & Safety* 2014;23:1031–9.
- 45  
46  
47  
48  
49 17 Flowerdew L, Brown R, Vincent C, Woloshynowych M. Identifying nontechnical skills  
50 associated with safety in the emergency department: a scoping review of the literature.  
51 *Ann Emerg Med* 2012;59:386–94.
- 52  
53  
54  
55  
56  
57  
58  
59  
60

- 1  
2  
3 18 Hughes AM, Gregory ME, Joseph DL, Sonesh SC, Marlow SL, Lacerenza CN, et al.  
4  
5 Saving Lives: A Meta-Analysis of Team Training in Healthcare. *J Appl Psychol*  
6  
7 2016;1266–304.  
8  
9  
10 19 O'Dea A, O'Connor P, Keogh I. A meta-analysis of the effectiveness of crew resource  
11  
12 management training in acute care domains. *Postgrad Med J* 2014;90:699–708.  
13  
14 20 Salas E, Rosen MA, King H. Managing teams managing crises: principles of teamwork  
15  
16 to improve patient safety in the Emergency Room and beyond. *Theoretical Issues in*  
17  
18 *Ergonomics Science* 2007;8:381–94.  
19  
20  
21 21 Salas E, Stagl KC, Burke CS, Goodwin GF. Fostering team effectiveness in  
22  
23 organizations: Toward an integrative theoretical framework. vol. 52, 2007, p. 185.  
24  
25  
26 22 Fernandez R, Kozlowski SW, Shapiro MJ, Salas E. Toward a definition of teamwork in  
27  
28 emergency medicine. *Acad Emerg Med* 2008;15:1104–12.  
29  
30  
31 23 Bowers CA, Braun CC, Morgan BB. Team workload: Its meaning and measurement. In:  
32  
33 Brannik MT, Salas E, Prince C, editors. *Team Performance Assessment and*  
34  
35 *Measurement: Theory, methods, and applications*, New York: Team performance  
36  
37 assessment and measurement: Theory, methods, and applications; 1997, pp. 85–108.  
38  
39  
40 24 Marks MA, Mathieu JE, Zaccaro SJ. A temporally based framework and taxonomy of  
41  
42 team processes. *The Academy of Management Review* 2001;26:356–76.  
43  
44  
45 25 Dietz AS, Pronovost PJ, Mendez-Tellez PA, Wyskiel R, Marsteller JA, Thompson DA,  
46  
47 et al. A systematic review of teamwork in the intensive care unit: What do we know  
48  
49 about teamwork, team tasks, and improvement strategies? *J Crit Care* 2014;29:908–14.  
50  
51  
52 26 Reader TW, Flin R, Mearns K, Cuthbertson BH. Developing a team performance  
53  
54 framework for the intensive care unit. *Crit Care Med* 2009;37:1787–93.  
55  
56  
57  
58  
59  
60

- 1  
2  
3 27 Ilgen DR, Hollenbeck JR, Johnson M, Jundt D. Teams in organizations: From input-  
4 process-output models to IMO models. *Annu Rev Psychol* 2005;56:517–43.  
5  
6  
7 28 Burke CS, Stagl KC, Salas E, Pierce L, Kendall D. Understanding team adaptation: a  
8 conceptual analysis and model. *J Appl Psychol* 2006;91:1189–207.  
9  
10  
11 29 Lemieux-Charles L. What Do We Know about Health Care Team Effectiveness? A  
12 Review of the Literature. *Med Care Res Rev* 2006;63:263–300.  
13  
14  
15 30 Kozlowski SWJ. Advancing research on team process dynamics: Theoretical,  
16 methodological, and measurement considerations. *Organizational Psychology Review*  
17 2015;5:270–99.  
18  
19  
20 31 Maloney MM, Bresman H, Zellmer-Bruhn ME, Beaver GR. Contextualization and  
21 Context Theorizing in Teams Research: A Look Back and a Path Forward. *The*  
22 *Academy of Management Annals* 2016;10:891–942.  
23  
24  
25 32 Kozlowski SW, Klein KJ. A multilevel approach to theory and research in  
26 organizations: Contextual, temporal, and emergent processes. 2000.  
27  
28  
29 33 Schofield RF, Amodeo M. Interdisciplinary teams in health care and human services  
30 settings: are they effective? *Health & Social Work* 1999;24:210–9.  
31  
32  
33 34 Hall P. Interprofessional teamwork: Professional cultures as barriers. *Journal of*  
34 *Interprofessional Care* 2005;19:188–96.  
35  
36  
37 35 Lillrank P. The quality of standard, routine and nonroutine processes. *Organization*  
38 *Studies* 2003;24:215–33.  
39  
40  
41 36 Eppich WJ, O'Connor L, Adler M. Providing effective simulation activities. In: Forrest  
42 K, McKimm J, Edgar S, editors. *Essential Simulation in Clinical Education*, Oxford,  
43 UK: John Wiley & Sons, Ltd; 2013, pp. 213–34.  
44  
45  
46  
47  
48  
49  
50  
51  
52  
53  
54  
55  
56  
57  
58  
59  
60



- 1  
2  
3 37 Anderson N, Ones DS, Sinangil HK, Viswesvaran C. Handbook of industrial, work and  
4 organizational psychology: Personnel psychology. vol. 1. London: Sage Publications  
5 Ltd; 2001.  
6  
7  
8  
9  
10 38 Sonnentag S, Frese M. Performance concepts and performance theory. Psychological  
11 Management of Individual Performance 2002;23:3–25.  
12  
13  
14 39 Cooper S, Cade J. Predicting survival, in-hospital cardiac arrests: resuscitation survival  
15 variables and training effectiveness. Resuscitation 1997;35:17–22.  
16  
17  
18  
19 40 Liberati A, Altman DG, Tetzlaff J, Mulrow C, Gøtzsche PC, Ioannidis JPA, et al. The  
20 PRISMA Statement for Reporting Systematic Reviews and Meta-Analyses of Studies  
21 That Evaluate Health Care Interventions: Explanation and Elaboration. PLoS Med  
22 2009;6:e1000100.  
23  
24  
25  
26  
27  
28 41 Hunter JE, Schmidt FL. Methods of meta-analysis: Correcting error and bias in research  
29 findings. Thousand Oaks, CA: Sage Publications; 2004.  
30  
31  
32  
33 42 Card N. Applied Meta-Analysis for Social Science Research. New York: Guilford  
34 Publications; 2015.  
35  
36  
37  
38 43 Fletcher GCL, McGeorge P, Flin RH, Glavin RJ, Maran NJ. The role of non-technical  
39 skills in anaesthesia: a review of current literature. Br J Anaesth 2002;88:418–29.  
40  
41  
42 44 Ghaferi AA, Dimick JB. Importance of teamwork, communication and culture on  
43 failure-to-rescue in the elderly. British Journal of Surgery 2016;103.  
44  
45  
46  
47 45 Mitchell L, Flin R. Non-technical skills of the operating theatre scrub nurse: literature  
48 review. J Adv Nurs 2008;63:15–24.  
49  
50  
51 46 Santos R, Bakero L, Franco P, Alves C, Fragata I, Fragata J. Characterization of non-  
52 technical skills in paediatric cardiac surgery: communication patterns. Eur J  
53  
54  
55  
56  
57  
58  
59  
60

- 1  
2  
3 Cardiothorac Surg 2012;41:1005–12.  
4  
5  
6 47 Youngson GG. Nontechnical skills in pediatric surgery: Factors influencing operative  
7  
8 performance. *Journal of Pediatric Surgery* 2016;51:226–30.  
9  
10 48 Kianfar S, Carayon P, Hundt AS, Hoonakker P. Care coordination for chronically ill  
11  
12 patients: Identifying coordination activities and interdependencies. *Applied Ergonomics*.  
13  
14 2019;80:9-16.  
15  
16  
17 49 Gully SM, Devine DJ, Whitney DJ. A meta-analysis of cohesion and performance  
18  
19 effects of level of analysis and task interdependence. *Small Group Research*  
20  
21 1995;26:497–520.  
22  
23  
24 50 Hunter JE, Schmidt FL. Dichotomization of continuous variables: The implications for  
25  
26 meta-analysis. *Journal of Applied Psychology* 1990;75:334.  
27  
28  
29 51 Campbell JP. Modeling the performance prediction problem in industrial and  
30  
31 organizational psychology. In: Dunnette MD, Hough LM, editors. *Handbook of*  
32  
33 *industrial and organizational psychology*, Palo Alto, CA: Consulting Psychologists  
34  
35 Press; 1990, pp. 687–732.  
36  
37  
38 52 Schmutz J, Eppich WJ, Hoffmann F, Heimberg E, Manser T. Five steps to develop  
39  
40 checklists for evaluating clinical performance: An integrative approach. *Acad Med*  
41  
42 2014;89:996–1005.  
43  
44  
45 53 Borenstein M, Hedges LV, Higgins JPT, Rothstein HR. *Introduction to Meta-Analysis*.  
46  
47 Hoboken, NJ: John Wiley & Sons, Ltd; 2009.  
48  
49  
50 54 Walker DA. JMASM9: converting Kendall's tau for correlational or meta-analytic  
51  
52 analyses. *J Mod Appl Stat Meth* 2003;2:525–30.  
53  
54  
55 55 Lipsey MW, Wilson D. *Practical meta-analysis*. New York: Sage Publications, Inc;

- 2001.
- 56 Rambo WW, Chomiak AM, Price JM. Consistency of performance under stable conditions of work. *J App Psy*. 1983;68:78.
- 57 Viechtbauer W. Conducting meta-analyses in R with the metafor package. *J Stat Softw* 2010;36:1–48.
- 58 Viechtbauer W. Bias and efficiency of meta-analytic variance estimators in the random-effects model. *Journal of Educational and Behavioral Statistics* 2005;30:261–93.
- 59 Sterne JA, Egger M. Regression methods to detect publication and other bias in meta-analysis. *Publication bias in meta-analysis: Prevention, assessment and adjustments*, Chichester: John Wiley & Sons; 2006, pp. 99–110.
- 60 Brogaard L, Kierkegaard O, Hvidmand L, Jensen KR, Uldbjerg N, Musaeus P, et al. Is non-technical performance the key to high clinical performance in obstetric teams? th Annual conference of the British Maternal Fetal Medicine Society, 2018.
- 61 Manser T, Bogdanovic J, Clack L., Arora S, Sevdalis N., Schmutz, J. Surgeon’s team management skills predict clinical performance. Paper presented at the Annual Meeting of the Society in Europe for Simulation Applied to Medecine (SESAM), Lisbon, Portugal, 2015.
- 62 Catchpole KR, Giddings AE, Wilkinson M, Hirst G, Dale T, de Leval MR. Improving patient safety by identifying latent failures in successful operations. *Surgery* 2007;142:102–10.
- 63 Catchpole K, Mishra A, Handa A, McCulloch P. Teamwork and Error in the Operating Room. *Ann Surg* 2008;247:699–706.
- 64 Viechtbauer W, Cheung, MWL. Outlier and influence diagnostics for meta-analysis.

- 1  
2  
3 Research Synthesis Methods 2010;1:112–125.  
4  
5  
6 65 Cohen J. Statistical power analysis for the behavioral sciences. Hillsdale, NJ: Erlbaum;  
7  
8 1988.  
9  
10 66 Bosco FA, Aguinis H, Singh K, Field JG, Pierce CA. Correlational effect size  
11  
12 benchmarks. Journal of Applied Psychology 2015;100:431.  
13  
14  
15 67 Haynes AB, Weiser TG, Berry WR, Lipsitz SR, Breizat A-HS, Dellinger EP, et al. A  
16  
17 surgical safety checklist to reduce morbidity and mortality in a global population. N  
18  
19 Engl J Med 2009;360:491–9.  
20  
21 68 Gaba DM, Howard SK, Flanagan B, Smith BE, Fish KJ, Botney R. Assessment of  
22  
23 Clinical Performance during Simulated Crises Using Both Technical and Behavioral  
24  
25 Ratings. Anesthesiology 1998;89:8–18.  
26  
27  
28 69 Rosen MA, Pronovost PJ. Advancing the use of checklists for evaluating performance  
29  
30 in health care. Acad Med 2014;89.  
31  
32  
33 70 Gaba DM, Howard SK, Fish KJ, Smith BE, Sowb YA. Simulation-based training in  
34  
35 anesthesia crisis resource management (ACRM): a decade of experience. Simulation &  
36  
37 Gaming 2001;32:175–93.  
38  
39  
40 71 Wageman R, Baker G. Incentives and cooperation: The joint effects of task and reward  
41  
42 interdependence on group performance. J Organiz Behav 1997:139–58.  
43  
44  
45 72 LePine JA, Piccolo RF, Jackson CL, Mathieu JE, Saul JR. A meta-analysis of teamwork  
46  
47 processes: tests of a multidimensional model and relationships with team effectiveness  
48  
49 criteria. Pers Psychol 2008;61:273–307.  
50  
51  
52 73 Maynard MT, Kennedy DM, Sommer SA. Team adaptation: A fifteen-year synthesis  
53  
54 (1998–2013) and framework for how this literature needs to “adapt” going forward.  
55  
56  
57  
58  
59  
60

- 1  
2  
3 European Journal of Work and Organizational Psychology 2015;24:1–26.  
4  
5 74 Edmondson AC. Teaming: How organizations learn, innovate, and compete in the  
6  
7 knowledge economy. San Francisco, CA: Jossey-Bass; 2012.  
8  
9  
10 75 Edmondson AC, Lei Z. Psychological safety: The history, renaissance, and future of an  
11  
12 interpersonal construct. *Annu Rev Organ Psychol Organ Behav* 2014;1:23–43.  
13  
14 76 Henrickson Parker, S., Schmutz, J. B., & Manser, T. Training needs for adaptive  
15  
16 coordination: Utilizing task analysis to identify coordination requirements in three  
17  
18 different clinical settings. *Gr & Org Manag* 2018;43:504-527.  
19  
20  
21 77 Eppich WJ, Mullan PC, Brett-Fleegler M, Cheng A. “Let's Talk About It”: Translating  
22  
23 Lessons From Health Care Simulation to Clinical Event Debriefings and Coaching  
24  
25 Conversations. *Clinical Pediatric Emergency Medicine* 2016;17:200–11.  
26  
27  
28 78 Schmutz JB, Eppich WJ. Promoting learning and patient care through shared reflection:  
29  
30 A conceptual framework for team reflexivity in healthcare. *Acad Med* 2017;92:1555–  
31  
32 63.  
33  
34  
35 79 Salas E, DiazGranados D, Weaver SJ, King H. Does Team Training Work? Principles  
36  
37 for Health Care. *Acad Emerg Med* 2008;15:1002–9.  
38  
39  
40 80 Amacher SA, Schumacher C, Legeret C, et al. Influence of Gender on the Performance  
41  
42 of Cardiopulmonary Rescue Teams: A Randomized, Prospective Simulator Study. *Crit*  
43  
44 *Care Med* 2017.  
45  
46  
47 81 Burtscher MJ, Kolbe M, Wacker J, et al. Interactions of team mental models and  
48  
49 monitoring behaviors predict team performance in simulated anesthesia inductions. *J*  
50  
51 *Exp Psychol Appl* 2011;17:257–69.  
52  
53  
54 82 Burtscher MJ, Manser T, Kolbe M, et al. Adaptation in anaesthesia team coordination in  
55  
56  
57  
58  
59  
60

- 1  
2  
3 response to a simulated critical event and its relationship to clinical performance. *Br J*  
4  
5 *Anaesth* 2011;106:801–6.  
6  
7  
8 83 Burtscher MJ, Wacker J, Grote G, et al. Managing nonroutine events in anesthesia: the  
9  
10 role of adaptive coordination. *Hum Factors* 2010;52:282–94.  
11  
12 84 Cooper S, Wakelam A. Leadership of resuscitation teams: “Lighthouse Leadership.”  
13  
14 *Resuscitation* 1999;42:27–45.  
15  
16  
17 85 Davenport DL, Henderson WG, Mosca CL, et al. Risk-adjusted morbidity in teaching  
18  
19 hospitals correlates with reported levels of communication and collaboration on surgical  
20  
21 teams but not with scale measures of teamwork climate, safety climate, or working  
22  
23 conditions. *J Am Coll Surg* 2007;205:778–84.  
24  
25  
26 86 El Bardissi AW, Wiegmann DA, Henrickson S, et al. Identifying methods to improve  
27  
28 heart surgery: an operative approach and strategy for implementation on an  
29  
30 organizational level. *Eur J Cardiothorac Surg* 2008;34:1027–33.  
31  
32  
33 87 Gillespie BM, Chaboyer W, Fairweather N. Factors that influence the expected length  
34  
35 of operation: results of a prospective study. *BMJ Qual Saf* 2012;21:3–12.  
36  
37  
38 88 Kolbe M, Burtscher MJ, Wacker J, et al. Speaking Up Is Related to Better Team  
39  
40 Performance in Simulated Anesthesia Inductions: An Observational Study. *Anesth*  
41  
42 *Analg* 2012.  
43  
44  
45 89 Künzle B, Zala-Mezo E, Wacker J. Leadership in anaesthesia teams: the most effective  
46  
47 leadership is shared. *Qual Saf Health Care* 2010;19:1–6.  
48  
49  
50 90 Manojlovich M, DeCicco B. Healthy Work Environments, Nurse-Physician  
51  
52 Communication, and Patients Outcomes. *Am J Crit Care* 2007;16:536–43.  
53  
54  
55 91 Marsch SCU, Müller C, Marquardt K, et al. Human factors affect the quality of  
56  
57  
58  
59  
60

- 1  
2  
3 cardiopulmonary resuscitation in simulated cardiac arrests. *Resuscitation* 2004;60:51–6.  
4  
5  
6 92 Mazzocco K, Petitti DB, Fong KT, et al. Surgical team behaviors and patient outcomes.  
7  
8 *Am J Surg* 2009;197:678–85.  
9  
10  
11 93 Mishra A, Catchpole K, Dale T, et al. The influence of non-technical performance on  
12  
13 technical outcome in laparoscopic cholecystectomy. *Surg Endosc* 2007;22:68–73.  
14  
15 94 Schmutz J, Hoffmann F, Heimberg E, et al. Effective coordination in medical  
16  
17 emergency teams: The moderating role of task type. *Europ J Work Org Psych*  
18  
19 2015;24:761–76.  
20  
21  
22 95 Siassakos D, Bristowe K, Draycott TJ, et al. Clinical Efficiency in a Simulated  
23  
24 Emergency and Relationship to Team Behaviors: A Multisite Cross-sectional Study.  
25  
26 *Obstet Anesth Digest* 2012;32:41.  
27  
28  
29 96 Siassakos D, Fox R, Crofts JF, et al. The management of a simulated emergency: Better  
30  
31 teamwork, better performance. *Resuscitation*  
32  
33  
34 97 Thomas EJ, Sexton JB, Lasky RE, et al. Teamwork and quality during neonatal care in  
35  
36 the delivery room. *J Perinatol* 2006;26:163–9.  
37  
38  
39 98 Tschan F, Semmer NK, Gautschi, et al. Leading to Recovery: Group Performance and  
40  
41 Coordinative Activities in Medical Emergency Driven Groups. *Hum Perf* 2006;19:277–  
42  
43 304.  
44  
45  
46 99 Tschan F, Semmer NK, Gurtner A, et al. Explicit reasoning, confirmation bias, and  
47  
48 illusory transactive memory: A simulation study of group medical decision making.  
49  
50 *Small Group Res* 2009;40:271–300.  
51  
52 100 Westli H, Johnsen B, Eid J, et al. Teamwork skills, shared mental models, and  
53  
54 performance in simulated trauma teams: an independent group design. *Scand J Trauma*  
55  
56  
57  
58  
59

- 1  
2  
3 *Resusc Emerg Med* 2010;18:47.  
4  
5  
6 101 Wiegmann DA, ElBardissi AW, Dearani JA. Disruptions in surgical flow and their  
7  
8 relationship to surgical errors: an exploratory investigation. *Surgery* 2007;142:658–65.  
9  
10  
11 102 Williams AL, Lasky RE, Dannemiller JL, et al. Teamwork behaviours and errors during  
12  
13 neonatal resuscitation. *Qual Saf Health Care* 2010;19:60–4.  
14  
15 103 Wright MC, Phillips-Bute BG, Petrusa ER et al. Assessing teamwork in medical  
16  
17 education and practice: relating behavioural teamwork ratings and clinical performance.  
18  
19 *Med Teach* 2009;31:30–8.  
20  
21 104 Yamada NK, Fuerch JH, Halamek LP. Impact of standardized communication  
22  
23 techniques on errors during simulated neonatal resuscitation. *AM J Perinatol*  
24  
25 2016;33:385–92.  
26  
27  
28  
29  
30  
31  
32  
33  
34  
35  
36  
37  
38  
39  
40  
41  
42  
43  
44  
45  
46  
47  
48  
49  
50  
51  
52  
53  
54  
55  
56  
57  
58  
59  
60



Table 1. Descriptions of study objectives, settings and description of teamwork process and outcome measures

| Authors                                     | Year | Main study objectives                                                                                                            | Participants and setting                                                                                                                                                | Teamwork process measure                                                                                                        | Outcome measure                                                              |
|---------------------------------------------|------|----------------------------------------------------------------------------------------------------------------------------------|-------------------------------------------------------------------------------------------------------------------------------------------------------------------------|---------------------------------------------------------------------------------------------------------------------------------|------------------------------------------------------------------------------|
| Amacher, Schumacher, Legeret, et al.[80]    | 2017 | To compare female and male rescuers in regard to cardiopulmonary resuscitation and leadership performance                        | Video observation of medical students managing cardiopulmonary resuscitation in a high-fidelity patient simulator                                                       | Structured observation of secure leadership statements within teams                                                             | Time until start chest compression<br>Hands-on time within first 180 seconds |
| Brogaard, Kierkegaard, Hvidmand, et al.[60] | 2018 | To investigate the relationship between non-technical skills and clinical performance in obstetric teams                         | Video observation of obstetric teams (Obstetricians, obstetric nurse, anaesthesiologists) managing real-life emergencies (postpartum haemorrhage)                       | Assessment of non-technical skills using a behaviourally anchored rating scale (ATOP; Assessment of Obstetric Team Performance) | Checklist tool for clinical performance (TeamOBS-PPH)                        |
| Burtscher, Kolbe, Wacker, et al.[81]        | 2011 | To investigate how team mental models and team monitoring behaviour interact to predict team performance in anaesthesia          | Video observation of anaesthesia teams (residents, nurses) conducting a standard anaesthesia induction using a high-fidelity patient simulator                          | Structured observation of team monitoring behaviour                                                                             | Checklist based expert rating                                                |
| Burtscher, Manser, Kolbe, et al.[82]        | 2011 | To investigate the relationship between adaptation of team coordination and clinical performance in response to a critical event | Video observation of anaesthesia teams (resident, nurse) conducting a standard anaesthesia induction including a critical event using a high-fidelity patient simulator | Structured observation of team coordination                                                                                     | Reaction time related to the critical event                                  |
| Burtscher, Wacker, Grote, et al.[83]        | 2010 | To examine the role of anaesthesia teams' adaptive coordination in managing changing situational demands                         | Video observation of anaesthesia teams (residents, nurses, students) conducting standard anaesthesia inductions with non-routine events                                 | Structured observation of team coordination                                                                                     | Checklist based expert rating                                                |

|    |                      |      |                                |                                  |                          |                     |
|----|----------------------|------|--------------------------------|----------------------------------|--------------------------|---------------------|
| 1  |                      |      |                                |                                  |                          |                     |
| 2  |                      |      |                                |                                  |                          |                     |
| 3  | Carlson, Min,        | 2009 | To explore the relationship    | Video observation of trainees    | Assessment of team       | Checklist based     |
| 4  | Bridges[9]           |      | between team behaviour and     | participating in a simulated     | behaviour using a        | expert rating       |
| 5  |                      |      | the delivery of an appropriate | event involving the presentation | behaviourally            |                     |
| 6  |                      |      | standard of care specific to   | of acute dyspnoea                | anchored rating scale    |                     |
| 7  |                      |      | the simulated case             |                                  | (leadership and team     |                     |
| 8  |                      |      |                                |                                  | behaviour                |                     |
| 9  |                      |      |                                |                                  | measurement tool)        |                     |
| 10 | Catchpole, Giddings, | 2007 | To investigate if effective    | Live observation of surgical     | Observation of non-      | Assessment of minor |
| 11 | Wilkinson, et        |      | teamwork can prevent the       | teams conducting paediatric      | technical skills using a | problems,           |
| 12 | al.[62]              |      | development of serious         | cardiac and orthopaedic          | behaviourally            | intraoperative      |
| 13 |                      |      | situations and provide         | surgeries                        | anchored rating scale    | performance and     |
| 14 |                      |      | evidence for improvements in   |                                  | (NOTECHS scoring         | duration of surgery |
| 15 |                      |      | training and systems           |                                  | system)                  |                     |
| 16 | Catchpole, Mishra,   | 2008 | To analyse the effects of      | Observation of surgical teams    | Observation of non-      | Operating time and  |
| 17 | Handa, et al.[63]    |      | surgical, aesthetic, and       | conducting laparoscopic          | technical skills using a | errors in surgical  |
| 18 |                      |      | nursing teamwork skills on     | cholecystectomies and carotid    | behaviourally            | technique           |
| 19 |                      |      | technical outcomes             | endarterectomies                 | anchored rating scale    |                     |
| 20 |                      |      |                                |                                  | (NOTECHS scoring         |                     |
| 21 |                      |      |                                |                                  | system)                  |                     |
| 22 | Cooper,              | 1999 | To examine the relationship    | Video observation of emergency   | Survey about leadership  | Checklist based     |
| 23 | Wakelam[84]          |      | between leadership behaviour,  | teams managing full              | behaviour using the      | expert rating       |
| 24 |                      |      | team dynamics and task         | cardiopulmonary arrests with a   | Leadership Behaviour     |                     |
| 25 |                      |      | performance                    | resuscitation attempt lasting    | Description              |                     |
| 26 |                      |      |                                | longer than 3 minutes            | Questionnaire            |                     |
| 27 |                      |      |                                |                                  |                          |                     |
| 28 | Davenport,           | 2007 | To measure the impact of       | Survey of staff on general and   | Survey about teamwork    | Surgical morbidity  |
| 29 | Henderson,           |      | organizational climate safety  | vascular surgery services        | climate, level of        | Surgical mortality  |
| 30 | Mosca, et al.[85]    |      | factors on risk-adjusted       |                                  | communication and        |                     |
| 31 |                      |      | surgical morbidity and         |                                  | collaboration with       |                     |
| 32 |                      |      | mortality                      |                                  | surgeon                  |                     |
| 33 | El Bardissi,         | 2008 | To identify patterns of        | Live observation of surgical     | Structured observation   | Surgical technical  |
| 34 | Wiegmann,            |      | teamwork failures that would   | teams conducting cardiac         | of teamwork failures     | errors              |
| 35 | Henrickson, et       |      | benefit from intervention in   | surgery                          | that disrupted the flow  |                     |
| 36 | al.[86]              |      | the cardiac surgical setting   |                                  | of the operation         |                     |
| 37 |                      |      |                                |                                  |                          |                     |
| 38 | Gillespie, Chaboyer, | 2012 | To investigate how various     | Live observation of surgical     | Structured observation   | Deviation from      |
| 39 | Fairweather[87]      |      | human factors variables,       | teams across 10 specialties      | of numbers of            | expected length of  |
| 40 |                      |      | extend the expected length of  |                                  | communication            | operation           |
| 41 |                      |      | an operation                   |                                  | failures                 |                     |
| 42 |                      |      |                                |                                  |                          |                     |
| 43 |                      |      |                                |                                  |                          |                     |
| 44 |                      |      |                                |                                  |                          |                     |
| 45 |                      |      |                                |                                  |                          |                     |
| 46 |                      |      |                                |                                  |                          |                     |
| 47 |                      |      |                                |                                  |                          |                     |

|    |                     |      |                                  |                                    |                         |                       |
|----|---------------------|------|----------------------------------|------------------------------------|-------------------------|-----------------------|
| 1  |                     |      |                                  |                                    |                         |                       |
| 2  |                     |      |                                  |                                    |                         |                       |
| 3  | Kolbe, Burtscher,   | 2012 | To test the relationship between | Observation of 2-person (nurse,    | Structured observation  | Checklist based       |
| 4  | Wacker, et al.[88]  |      | speaking up and technical        | resident) ad hoc anaesthesia       | of speaking up          | expert rating         |
| 5  |                     |      | team performance in              | teams performing simulated         | behaviour               |                       |
| 6  |                     |      | anaesthesia.                     | inductions of general              |                         |                       |
| 7  |                     |      |                                  | anaesthesia with minor             |                         |                       |
| 8  |                     |      |                                  | nonroutine events                  |                         |                       |
| 9  | Kuenzle, Zala-Mezo, | 2009 | To investigate shared leadership | Observation of 2-person (nurse,    | Structured observation  | Reaction time to      |
| 10 | Wacker, et al.[89]  |      | patterns during anaesthesia      | resident) ad hoc anaesthesia       | of leadership           | nonroutine event      |
| 11 |                     |      | induction and to show how        | teams performing simulated         | behaviour               |                       |
| 12 |                     |      | they are linked to team          | inductions of general              |                         |                       |
| 13 |                     |      | performance                      | anaesthesia with a nonroutine      |                         |                       |
| 14 |                     |      |                                  | event (asystole)                   |                         |                       |
| 15 | Manojilovich,       | 2009 | To determine the relationships   | A survey was conducted with        | Survey about perception | Ventilator-associated |
| 16 | Antonakos, David,   |      | between patients' outcomes       | nurses on various ICU wards        | of nurse-physician      | pneumonia             |
| 17 | et al.[90]          |      | and nurses' perceptions of       |                                    | communication using     | Bloodstream           |
| 18 |                     |      | communication and                |                                    | the ICU-nurse           | infections            |
| 19 |                     |      | characteristics of the practice  |                                    | physician               | Pressure ulcers       |
| 20 |                     |      | environment.                     |                                    | questionnaire           | Acute physiology and  |
| 21 |                     |      |                                  |                                    |                         | chronic health        |
| 22 |                     |      |                                  |                                    |                         | evaluation score      |
| 23 | Manser, Bogdanovic, | 2015 | To investigate surgeons team     | Live observation of surgical       | Structured observation  | Checklist based       |
| 24 | Clack, et al. [61]  |      | management skills and its        | teams managing a simulated         | of team management      | expert rating         |
| 25 |                     |      | influence on performance         | laparoscopic cholecystectomy       | using the ComEd-E       |                       |
| 26 |                     |      |                                  |                                    | observation system      |                       |
| 27 | Marsch, Müller,     | 2004 | To determine whether and how     | Observation of healthcare worker   | Structured observation  | Checklist based       |
| 28 | Marquardt, et       |      | human factors affect the         | (nurse, physician) managing a      | of task distribution,   | expert rating         |
| 29 | al.[91]             |      | quality of cardiopulmonary       | cardiac arrest due to ventricular  | information transfer    |                       |
| 30 |                     |      | resuscitation                    | fibrillation using a high-fidelity | and leadership          |                       |
| 31 |                     |      |                                  | patient simulator                  | behaviour within the    |                       |
| 32 |                     |      |                                  |                                    | team                    |                       |
| 33 | Mazzocco, Petitti,  | 2009 | To determine if patients of      | Live observation of surgical       | Structured observation  | Postoperative         |
| 34 | Fong, et al.[92]    |      | teams with good teamwork         | teams managing a variety of        | of information sharing, | complications and     |
| 35 |                     |      | had better outcomes than         | surgical procedures                | inquiry for relevant    | death                 |
| 36 |                     |      | those with poor teamwork         |                                    | information and         |                       |
| 37 |                     |      |                                  |                                    | vigilance and           |                       |
| 38 |                     |      |                                  |                                    | awareness using a       |                       |
| 39 |                     |      |                                  |                                    | behaviourally           |                       |
| 40 |                     |      |                                  |                                    | anchored rating scale   |                       |
| 41 |                     |      |                                  |                                    |                         |                       |
| 42 |                     |      |                                  |                                    |                         |                       |
| 43 |                     |      |                                  |                                    |                         |                       |
| 44 |                     |      |                                  |                                    |                         |                       |
| 45 |                     |      |                                  |                                    |                         |                       |
| 46 |                     |      |                                  |                                    |                         |                       |
| 47 |                     |      |                                  |                                    |                         |                       |

|    |                      |      |                                 |                                   |                          |                      |
|----|----------------------|------|---------------------------------|-----------------------------------|--------------------------|----------------------|
| 1  |                      |      |                                 |                                   |                          |                      |
| 2  |                      |      |                                 |                                   |                          |                      |
| 3  | Mishra, Catchpole,   | 2008 | To report on the development    | Live observation of surgical      | Assessment of non-       | Surgical technical   |
| 4  | Dale, et al.[93]     |      | and evaluation of a method      | teams conducting laparoscopic     | technical skills using a | errors assessed      |
| 5  |                      |      | for measuring operating-        | cholecystectomy                   | behaviourally            | with the OCHRA-      |
| 6  |                      |      | theatre teamwork quality        |                                   | anchored rating scale    | tool                 |
| 7  |                      |      |                                 |                                   | (NOTECHS scoring         |                      |
| 8  |                      |      |                                 |                                   | system)                  |                      |
| 9  | Schmutz, Hoffmann,   | 2015 | To investigate the moderating   | Video observation of paediatric   | Structured observation   | Checklist based      |
| 10 | Heimberg, et         |      | effect of task characteristics  | teams managing various            | of closed loop           | expert rating        |
| 11 | al.[94]              |      | on the relationship between     | paediatric emergencies using a    | communication, task      |                      |
| 12 |                      |      | coordination and performance    | high-fidelity patient simulator   | distribution and         |                      |
| 13 |                      |      |                                 |                                   | provide information      |                      |
| 14 |                      |      |                                 |                                   | without request using    |                      |
| 15 |                      |      |                                 |                                   | the CoMeT-E              |                      |
| 16 |                      |      |                                 |                                   | observation system       |                      |
| 17 | Siassakos, Bristowe, | 2012 | To investigate the relationship | Video observation of teams        | Structured observation   | Timely               |
| 18 | Draycott, et al.[95] |      | between patient satisfaction    | (physicians, midwives)            | of closed loop           | administration of    |
| 19 |                      |      | and communication               | managing obstetric emergencies    | communication            | magnesium            |
| 20 |                      |      |                                 | in secondary and tertiary         |                          | sulphate             |
| 21 |                      |      |                                 | maternity units                   |                          |                      |
| 22 | Siassakos, Fox,      | 2011 | To determine whether team       | Video observation of healthcare   | Assessment of generic    | Clinical efficiency  |
| 23 | Crofts, et al.[96]   |      | performance in a simulated      | professionals (physician,         | teamwork using a         | score                |
| 24 |                      |      | emergency is related to         | midwives) managing various        | behaviourally            |                      |
| 25 |                      |      | generic teamwork skills and     | emergencies using a high-         | anchored rating scale    |                      |
| 26 |                      |      | behaviors                       | fidelity patient simulator        | (teamwork analytical     |                      |
| 27 |                      |      |                                 |                                   | tool)                    |                      |
| 28 | Thomas, Sexton,      | 2006 | To investigate the relationship | Video observation of neonatal     | Structured observation   | Compliance with      |
| 29 | Lasky, et al.[97]    |      | of team behaviours during       | care teams managing a             | of communication,        | Neonatal             |
| 30 |                      |      | delivery room care and          | resuscitation during a caesarean  | team management and      | Resuscitation        |
| 31 |                      |      | behaviours relate to the        | section                           | leadership               | Program guidelines   |
| 32 |                      |      | quality of care                 |                                   |                          |                      |
| 33 | Tschan, Semmer,      | 2006 | To investigate the influence of | Video observation of medical      | Structured observation   | Clinical performance |
| 34 | Gautschi, et al.[98] |      | human factors on team           | emergency teams (senior doctor,   | of directive leadership  | assessed based on a  |
| 35 |                      |      | performance in medical          | resident, nurse) managing a       | and structuring inquiry  | time-based coding    |
| 36 |                      |      | emergency driven groups         | cardiac arrest in a high-fidelity |                          | of observable        |
| 37 |                      |      |                                 | patient simulator                 |                          | technical acts       |
| 38 |                      |      |                                 |                                   |                          |                      |
| 39 |                      |      |                                 |                                   |                          |                      |
| 40 |                      |      |                                 |                                   |                          |                      |
| 41 |                      |      |                                 |                                   |                          |                      |
| 42 |                      |      |                                 |                                   |                          |                      |
| 43 |                      |      |                                 |                                   |                          |                      |
| 44 |                      |      |                                 |                                   |                          |                      |
| 45 |                      |      |                                 |                                   |                          |                      |
| 46 |                      |      |                                 |                                   |                          |                      |
| 47 |                      |      |                                 |                                   |                          |                      |

|    |                       |      |                                 |                                   |                          |                   |
|----|-----------------------|------|---------------------------------|-----------------------------------|--------------------------|-------------------|
| 1  |                       |      |                                 |                                   |                          |                   |
| 2  |                       |      |                                 |                                   |                          |                   |
| 3  | Tschan, Semmer,       | 2009 | To investigate the influence of | Video observation of groups of    | Structured observation   | Accuracy of       |
| 4  | Gurtner, et al.[99]   |      | communication on diagnostic     | physicians diagnosing a difficult | of the diagnostic        | diagnosis         |
| 5  |                       |      | accuracy in ambiguous           | patient with an anaphylactic      | information that have    |                   |
| 6  |                       |      | situations                      | shock in a high-fidelity patient  | been considered,         |                   |
| 7  |                       |      |                                 | simulator                         | explicit reasoning and   |                   |
| 8  |                       |      |                                 |                                   | talking to the room      |                   |
| 9  |                       |      |                                 |                                   |                          |                   |
| 10 | Westli, Johnsen, Eid, | 2010 | To investigate whether          | Video observation of trauma       | Assessment of non-       | Checklist based   |
| 11 | et al.[100]           |      | demonstrated teamwork skills    | teams (surgeons,                  | technical skills using a | expert rating     |
| 12 |                       |      | and behaviour indicating        | anaesthesiologists, nurses,       | behaviourally            |                   |
| 13 |                       |      | shared mental models would      | radiographers) in a high-fidelity | anchored rating scale    |                   |
| 14 |                       |      | be associated with improved     | patient simulator                 | (ANTS and ATOM           |                   |
| 15 |                       |      | medical management              |                                   | scoring system)          |                   |
| 16 | Wiegmann, El          | 2007 | To investigate surgical errors  | Live observation of surgical      | Structured observation   | Structured        |
| 17 | Bardissi, Dearani,    |      | and their relationship to       | teams conducting cardiac          | of teamwork and          | observation of    |
| 18 | et al.[101]           |      | surgical flow disruptions to    | surgery operations                | communication            | surgical errors   |
| 19 |                       |      | understand better the effect of |                                   | failures                 | during the        |
| 20 |                       |      | these disruptions on surgical   |                                   |                          | operation         |
| 21 |                       |      | errors and patient safety       |                                   |                          |                   |
| 22 | Williams, Lasky,      | 2010 | To describe relationships       | Video observation of intensive    | Structured observation   | Structured        |
| 23 | Dannemiller, et       |      | between teamwork                | care teams managing neonatal      | of teamwork behaviour    | observation of    |
| 24 | al.[102]              |      | behaviours and errors during    | resuscitations                    | (vigilance, workload     | errors (non-      |
| 25 |                       |      | neonatal resuscitation          |                                   | management,              | compliance with   |
| 26 |                       |      |                                 |                                   | information sharing,     | guidelines)       |
| 27 |                       |      |                                 |                                   | inquiry, assertion)      |                   |
| 28 | Wright, Phillips-     | 2009 | To test if observer ratings of  | Video observation of teams        | Observation using a      | Checklist based   |
| 29 | Bute, Petrusa, et     |      | team skills will correlate with | consisting of medical students    | behaviourally            | expert rating     |
| 30 | al.[103]              |      | objective measures of clinical  | performing low-fidelity           | anchored rating scale    |                   |
| 31 |                       |      | performance                     | classroom based patient           | for teamwork skills      |                   |
| 32 |                       |      |                                 | assessment and high-fidelity      | (assertiveness,          |                   |
| 33 |                       |      |                                 | simulation emergent care.         | decision-making,         |                   |
| 34 |                       |      |                                 |                                   | situation assessment,    |                   |
| 35 |                       |      |                                 |                                   | leadership,              |                   |
| 36 | Yamada, Fuerch,       | 2016 | To investigate the effect of    | Video observation of teams        | Structured observation   | Error rate        |
| 37 | Halamek[104]          |      | standardized communication      | (Neonatologists, neonatal nurse   | of standardised          | Time to initiate  |
| 38 |                       |      | techniques on errors during     | practitioners, neonatology        | communication            | positive pressure |
| 39 |                       |      | resuscitation                   | fellows) managing neonatal        |                          | ventilation       |
| 40 |                       |      |                                 | resuscitation                     |                          | Time to chest     |
| 41 |                       |      |                                 |                                   |                          | compression       |
| 42 |                       |      |                                 |                                   |                          |                   |
| 43 |                       |      |                                 |                                   |                          |                   |
| 44 |                       |      |                                 |                                   |                          |                   |
| 45 |                       |      |                                 |                                   |                          |                   |
| 46 |                       |      |                                 |                                   |                          |                   |
| 47 |                       |      |                                 |                                   |                          |                   |

Table 2. Studies, effect sizes and moderator variables included in the meta-analytic database

| Authors                                       | Year | Study goal       | Setting            | No. of teams | Professional composition | Team familiarity | Average team size | Task type             | Patient realism | Performance measure |
|-----------------------------------------------|------|------------------|--------------------|--------------|--------------------------|------------------|-------------------|-----------------------|-----------------|---------------------|
| Amacher, Schumacher, Legeret, et al.[80]      | 2017 | .11              | Emergency medicine | 72           | Uniprofessional          | Experimental     | 3                 | Non-routine           | Simulated       | Process             |
| Brogaard, Kierkegaard, Hvidmand, et al.[60]   | 2018 | .43              | Obstetrics         | 99           | Interprofessional        | Real             | 5                 | Non-routine           | Real            | Process             |
| Burtscher, Kolbe, Wacker, et al.[81]          | 2011 | -.27             | Anaesthesia        | 31           | Interprofessional        | Experimental     | 2                 | Routine               | Simulated       | Process             |
| Burtscher, Manser, Kolbe, et al.[82]          | 2011 | .19              | Anaesthesia        | 15           | Interprofessional        | Experimental     | 2                 | Routine & non-routine | Simulated       | Process             |
| Burtscher, Wacker, Grote, et al.[83]          | 2010 | .07              | Anaesthesia        | 22           | Interprofessional        | Real             | 3                 | Non-routine           | Real            | Process             |
| Carlson, Min, Bridges[9] <sup>b</sup>         | 2009 | .83              | Emergency medicine | 44           | Uniprofessional          | Experimental     | 2.6               | Non-routine           | Simulated       | Process             |
| Catchpole, Giddings, Wilkinson, et al.[62]    | 2007 | .45 <sup>†</sup> | Surgery            | 24           | Interprofessional        | Real             | 9                 | Non-routine           | Real            | Process             |
|                                               | 2007 | .29 <sup>†</sup> | Surgery            | 18           | Interprofessional        | Real             | 5                 | Routine               | Real            | Process             |
| Catchpole, Mishra, Handa, et al.[63]          | 2008 | .36 <sup>†</sup> | Surgery            | 26           | Interprofessional        | Real             |                   | Routine               | Real            | Process             |
|                                               | 2008 | .09 <sup>†</sup> | Surgery            | 22           | Interprofessional        | Real             |                   | Routine               | Real            | Process             |
| Cooper, Wakelam[84]                           | 1999 | .50              | General care       | 20           | Interprofessional        | Real             | 4                 | Routine               | Real            | Process             |
| Davenport, Henderson, Mosca, et al.[85]       | 2007 | .17              | Surgery            | 52           | Interprofessional        | Real             |                   | Routine               | Real            | Outcome             |
| El Bardissi, Wiegmann, Henrickson, et al.[86] | 2008 | .67              | Surgery            | 31           | Interprofessional        | Real             | 7                 | Routine               | Real            | Process             |
| Gillespie, Chaboyer, Fairweather[87]          | 2012 | .23              | Surgery            | 160          | Interprofessional        | Real             | 6                 | Routine               | Real            | Process             |
| Kolbe, Burtscher, Wacker, et al.[88]          | 2012 | .33              | Anaesthesia        | 31           | Interprofessional        | Real             | 2                 | Non-routine           | Simulated       | Process             |
| Kuenzle, Zala-Mezo, Wacker, et al.[89]        | 2009 | .56              | Anaesthesia        | 12           | Interprofessional        | Real             | 2                 | Routine               | Simulated       | Process             |
| Manojilovich, Antonakos, David, et al.[90]    | 2009 | .11              | Intensive care     | 25           | Uniprofessional          | Real             | 36                | Routine               | Real            | Outcome             |

|    |                                     |      |     |                         |     |                   |              |      |             |           |         |
|----|-------------------------------------|------|-----|-------------------------|-----|-------------------|--------------|------|-------------|-----------|---------|
| 1  |                                     |      |     |                         |     |                   |              |      |             |           |         |
| 2  |                                     |      |     |                         |     |                   |              |      |             |           |         |
| 3  | Manser, Bogdanovic, Clack, et       | 2015 | .39 | Surgery                 | 19  | Interprofessional | Experimental | 5    | Routine     | Simulated | Process |
| 4  | al.[61]                             |      |     |                         |     |                   |              |      |             |           |         |
| 5  | Marsch, Müller, Marquardt, et       | 2004 | .23 | Intensive               | 16  | Interprofessional | Experimental | 3    | Non-routine | Simulated | Process |
| 6  | al.[91]                             |      |     | care                    |     |                   |              |      |             |           |         |
| 7  | Mazzocco, Petitti, Fong, et al.[92] | 2009 | .11 | Surgery                 | 293 | Interprofessional | Real         | 6    | Routine     | Real      | Outcome |
| 8  |                                     |      |     |                         |     |                   |              |      |             |           |         |
| 9  | Mishra, Catchpole, Dale, et         | 2008 | .05 | Surgery                 | 26  | Interprofessional | Real         | 6    | Routine     | Real      | Process |
| 10 | al.[93]                             |      |     |                         |     |                   |              |      |             |           |         |
| 11 | Schmutz, Hoffmann, Heimberg,        | 2015 | .12 | Emergency               | 68  | Interprofessional | Real         | 6    | Non-routine | Simulated | Process |
| 12 | et al.[94]                          |      |     | medicine                |     |                   |              |      |             |           |         |
| 13 | Siassakos, Bristowe, Draycott, et   | 2012 | .66 | Obstetrics              | 19  | Interprofessional | Real         | 6    | Non-routine | Simulated | Process |
| 14 | al.[95]                             |      |     |                         |     |                   |              |      |             |           |         |
| 15 | Siassakos, Fox, Crofts, et al.[96]  | 2011 | .55 | Emergency               | 24  | Interprofessional | Experimental | 6    | Non-routine | Simulated | Process |
| 16 |                                     |      |     | medicine/<br>obstetrics |     |                   |              |      |             |           |         |
| 17 | Thomas, Sexton, Lasky, et al.[97]   | 2006 | .23 | Neonatal                | 132 | Interprofessional | Real         | 5    | Non-routine | Real      | Process |
| 18 |                                     |      |     | care                    |     |                   |              |      |             |           |         |
| 19 | Tschan, Semmer, Gautschi, et        | 2006 | .23 | Emergency               | 21  | Interprofessional | Experimental | 5    | Non-routine | Simulated | Process |
| 20 | al.[98]                             |      |     | medicine                |     |                   |              |      |             |           |         |
| 21 | Tschan, Semmer, Gurtner, et         | 2009 | .37 | Emergency               | 20  | Uniprofessional   | Experimental | 2.65 | Non-routine | Simulated | Outcome |
| 22 | al.[99]                             |      |     | medicine                |     |                   |              |      |             |           |         |
| 23 | Westli, Johnsen, Eid, et al.[100]   | 2010 | .18 | Emergency               | 27  | Interprofessional | Real         | 5.1  | Non-routine | Simulated | Process |
| 24 |                                     |      |     | medicine                |     |                   |              |      |             |           |         |
| 25 | Wiegmann, El Bardissi, Dearani,     | 2007 | .56 | Surgery                 | 31  | Interprofessional | Real         |      | Routine     | Real      | Process |
| 26 | et al.[101]                         |      |     |                         |     |                   |              |      |             |           |         |
| 27 | Williams, Lasky, Dannemiller, et    | 2010 | .18 | Neonatal                | 12  | Interprofessional | Real         | 5    | Non-routine | Real      | Process |
| 28 | al.[102]                            |      |     | care                    |     |                   |              |      |             |           |         |
| 29 | Wright, Phillips-Bute, Petrusa, et  | 2009 | .81 | General care            | 9   | Uniprofessional   | Experimental | 4    | Non-routine | Simulated | Process |
| 30 | al.[103]                            |      |     |                         |     |                   |              |      |             |           |         |
| 31 | Yamada, Fuerch, Halamek[104]        | 2016 | .11 | Emergency               | 13  | Interprofessional | Experimental | 3    | Non-routine | Simulated | Process |
| 32 |                                     |      |     | medicine                |     |                   |              |      |             |           |         |
| 33 |                                     |      |     |                         |     |                   |              |      |             |           |         |

<sup>a</sup> Effect sizes ( $r$ ) with an † represent an average for a single sample and a single outcome and have been combined for this meta-analysis.

<sup>b</sup> Carlson, Min & Bridges has been identified as an outlier and therefore excluded from the analysis

Table 3. Meta-Analytic relationships between teamwork and clinical performance

|                                 | N     | k  | r    | 95% CI       | 80% CR       | Q     | I <sup>2</sup> |
|---------------------------------|-------|----|------|--------------|--------------|-------|----------------|
| Overall relationship            | 1,390 | 31 | .28* | [.20 ; .35]  | [.09 ; .45]  | 53.7* | 46.0           |
| <i>Team characteristics</i>     |       |    |      |              |              |       |                |
| <i>Professional composition</i> |       |    |      |              |              |       |                |
| Interprofessional               | 1,264 | 27 | .28* | [.20 ; .36]  | [.09 ; .46]  | 47.1* | 48.2           |
| Uniprofessional                 | 126   | 4  | .28  | [-.01 ; .52] | [-.04 ; .54] | 6.5   | 47.1           |
| <i>Team familiarity</i>         |       |    |      |              |              |       |                |
| Experimental team               | 240   | 10 | .25* | [.05 ; .43]  | [-.05 ; .51] | 17.2* | 47.2           |
| Real team                       | 1,150 | 21 | .29* | [.20 ; .37]  | [.12 ; .45]  | 36.2* | 45.7           |
| Team size <sup>a</sup>          |       |    |      |              |              |       |                |
| <i>Task characteristics</i>     |       |    |      |              |              |       |                |
| <i>Task type</i>                |       |    |      |              |              |       |                |
| Routine task                    | 766   | 14 | .27* | [.12 ; .40]  | [-.01 ; .50] | 30.9* | 65.0           |
| Non-routine task                | 609   | 16 | .29* | [.20 ; .39]  | [.16 ; .42]  | 20.5  | 24.6           |
| <i>Methodological factors</i>   |       |    |      |              |              |       |                |
| <i>Patient realism</i>          |       |    |      |              |              |       |                |
| Real patient                    | 993   | 16 | .28* | [.18 ; .38]  | [.10 ; .45]  | 28.7* | 49.3           |
| Simulated patient               | 397   | 15 | .28* | [.13 ; .41]  | [.02 ; .50]  | 25.0* | 44.6           |
| <i>Performance measures</i>     |       |    |      |              |              |       |                |
| Outcome performance             | 390   | 4  | .13* | [.03 ; .23]  | [.06 ; .19]  | 1.3   | 0.0            |
| Process performance             | 1,000 | 27 | .30* | [.21 ; .39]  | [.10 ; .49]  | 45.6* | 45.6           |

Note. *k* = number of studies; *N* = cumulative sample size (number of teams); *r* = sample-size weighted correlation; CI = confidence interval; CR = credibility interval; *Q* = test statistic for residual heterogeneity of the models; *I*<sup>2</sup> = % of total variability in the effect size estimates due to heterogeneity among true effects (vs. sampling error)

<sup>a</sup> Team size was entered as a continuous variable, therefore, no subgroup analyses exist

\* *p* < .05.



1  
2  
3  
4  
5  
6  
7  
8  
9  
10  
11  
12  
13  
14  
15  
16  
17  
18  
19  
20  
21  
22  
23  
24  
25  
26  
27  
28  
29  
30  
31  
32  
33  
34  
35  
36  
37  
38  
39  
40  
41  
42  
43  
44  
45  
46  
47  
48  
49  
50  
51  
52  
53  
54  
55  
56  
57  
58  
59  
60

**LEGENDS TO FIGURES**

**Figure 1**      Systematic literature search

**Figure 2**      Relationship between teamwork processes and performance

For peer review only





Figure 2. Relationship between teamwork processes and performance.

## SUPPLEMENTARY FILE

Article: **How effective is teamwork really? The relationship between teamwork and performance in healthcare teams: A systematic review and meta-analysis**

Jan B. Schmutz, PhD; Laurenz L. Meier, PhD; Tanja Manser, PhD

### Search terms used for PubMed search

(Teamwork[All Fields]) OR (team[All Fields] AND coordination[All Fields]) OR (team[All Fields] AND "decision making"[All Fields]) OR ((team[All Fields]) AND (communication[MeSH Terms]) OR (communication[All Fields])) OR (team[All Fields] AND leadership[All Fields]) AND (patient safety[MeSH Terms])



# PRISMA 2009 Checklist

| Section/topic                      | #  | Checklist item                                                                                                                                                                                                                                                                                              | Reported on page #          |
|------------------------------------|----|-------------------------------------------------------------------------------------------------------------------------------------------------------------------------------------------------------------------------------------------------------------------------------------------------------------|-----------------------------|
| <b>TITLE</b>                       |    |                                                                                                                                                                                                                                                                                                             |                             |
| Title                              | 1  | Identify the report as a systematic review, meta-analysis, or both.                                                                                                                                                                                                                                         | 1                           |
| <b>ABSTRACT</b>                    |    |                                                                                                                                                                                                                                                                                                             |                             |
| Structured summary                 | 2  | Provide a structured summary including, as applicable: background; objectives; data sources; study eligibility criteria, participants, and interventions; study appraisal and synthesis methods; results; limitations; conclusions and implications of key findings; systematic review registration number. | 2                           |
| <b>INTRODUCTION</b>                |    |                                                                                                                                                                                                                                                                                                             |                             |
| Rationale                          | 3  | Describe the rationale for the review in the context of what is already known.                                                                                                                                                                                                                              | 4-8                         |
| Objectives                         | 4  | Provide an explicit statement of questions being addressed with reference to participants, interventions, comparisons, outcomes, and study design (PICOS).                                                                                                                                                  | 4-5                         |
| <b>METHODS</b>                     |    |                                                                                                                                                                                                                                                                                                             |                             |
| Protocol and registration          | 5  | Indicate if a review protocol exists, if and where it can be accessed (e.g., Web address), and, if available, provide registration information including registration number.                                                                                                                               | n/a                         |
| Eligibility criteria               | 6  | Specify study characteristics (e.g., PICOS, length of follow-up) and report characteristics (e.g., years considered, language, publication status) used as criteria for eligibility, giving rationale.                                                                                                      | 9-10                        |
| Information sources                | 7  | Describe all information sources (e.g., databases with dates of coverage, contact with study authors to identify additional studies) in the search and date last searched.                                                                                                                                  | 9                           |
| Search                             | 8  | Present full electronic search strategy for at least one database, including any limits used, such that it could be repeated.                                                                                                                                                                               | 9 and supplemental material |
| Study selection                    | 9  | State the process for selecting studies (i.e., screening, eligibility, included in systematic review, and, if applicable, included in the meta-analysis).                                                                                                                                                   | 9-10                        |
| Data collection process            | 10 | Describe method of data extraction from reports (e.g., piloted forms, independently, in duplicate) and any processes for obtaining and confirming data from investigators.                                                                                                                                  | 10                          |
| Data items                         | 11 | List and define all variables for which data were sought (e.g., PICOS, funding sources) and any assumptions and simplifications made.                                                                                                                                                                       | 9-12                        |
| Risk of bias in individual studies | 12 | Describe methods used for assessing risk of bias of individual studies (including specification of whether this was done at the study or outcome level), and how this information is to be used in any data synthesis.                                                                                      | 20                          |
| Summary measures                   | 13 | State the principal summary measures (e.g., risk ratio, difference in means).                                                                                                                                                                                                                               | 13-19 / 23                  |



# PRISMA 2009 Checklist

|                      |    |                                                                                                                                                           |       |
|----------------------|----|-----------------------------------------------------------------------------------------------------------------------------------------------------------|-------|
| Synthesis of results | 14 | Describe the methods of handling data and combining results of studies, if done, including measures of consistency (e.g., $I^2$ ) for each meta-analysis. | 20-23 |
|----------------------|----|-----------------------------------------------------------------------------------------------------------------------------------------------------------|-------|

Page 1 of 2

| Section/topic                 | #  | Checklist item                                                                                                                                                                                           | Reported on page # |
|-------------------------------|----|----------------------------------------------------------------------------------------------------------------------------------------------------------------------------------------------------------|--------------------|
| Risk of bias across studies   | 15 | Specify any assessment of risk of bias that may affect the cumulative evidence (e.g., publication bias, selective reporting within studies).                                                             | 20,26              |
| Additional analyses           | 16 | Describe methods of additional analyses (e.g., sensitivity or subgroup analyses, meta-regression), if done, indicating which were pre-specified.                                                         | 22-23              |
| <b>RESULTS</b>                |    |                                                                                                                                                                                                          |                    |
| Study selection               | 17 | Give numbers of studies screened, assessed for eligibility, and included in the review, with reasons for exclusions at each stage, ideally with a flow diagram.                                          | 21                 |
| Study characteristics         | 18 | For each study, present characteristics for which data were extracted (e.g., study size, PICOS, follow-up period) and provide the citations.                                                             | 18-19              |
| Risk of bias within studies   | 19 | Present data on risk of bias of each study and, if available, any outcome level assessment (see item 12).                                                                                                | 18-19, 20          |
| Results of individual studies | 20 | For all outcomes considered (benefits or harms), present, for each study: (a) simple summary data for each intervention group (b) effect estimates and confidence intervals, ideally with a forest plot. | 13-19              |
| Synthesis of results          | 21 | Present results of each meta-analysis done, including confidence intervals and measures of consistency.                                                                                                  | 23                 |
| Risk of bias across studies   | 22 | Present results of any assessment of risk of bias across studies (see Item 15).                                                                                                                          | 23                 |
| Additional analysis           | 23 | Give results of additional analyses, if done (e.g., sensitivity or subgroup analyses, meta-regression [see Item 16]).                                                                                    | N/A                |
| <b>DISCUSSION</b>             |    |                                                                                                                                                                                                          |                    |
| Summary of evidence           | 24 | Summarize the main findings including the strength of evidence for each main outcome; consider their relevance to key groups (e.g., healthcare providers, users, and policy makers).                     | 24-27              |
| Limitations                   | 25 | Discuss limitations at study and outcome level (e.g., risk of bias), and at review-level (e.g., incomplete retrieval of identified research, reporting bias).                                            | 26-27              |
| Conclusions                   | 26 | Provide a general interpretation of the results in the context of other evidence, and implications for future research.                                                                                  | 27                 |
| <b>FUNDING</b>                |    |                                                                                                                                                                                                          |                    |
| Funding                       | 27 | Describe sources of funding for the systematic review and other support (e.g., supply of data); role of funders for the systematic review.                                                               | 28                 |



# PRISMA 2009 Checklist

1  
2  
3  
4  
5  
6  
7  
8  
9  
10  
11  
12  
13  
14  
15  
16  
17  
18  
19  
20  
21  
22  
23  
24  
25  
26  
27  
28  
29  
30  
31  
32  
33  
34  
35  
36  
37  
38  
39  
40  
41  
42  
43  
44  
45  
46  
47

*From:* Moher D, Liberati A, Tetzlaff J, Altman DG, The PRISMA Group (2009). Preferred Reporting Items for Systematic Reviews and Meta-Analyses: The PRISMA Statement. PLoS Med 6(6): e1000097. doi:10.1371/journal.pmed1000097

For more information, visit: [www.prisma-statement.org](http://www.prisma-statement.org).

Page 2 of 2

For peer review only
